1

2

3

4 **Premature termination codons signaled targeted gene repair**  
5 **by nonsense mRNA-mediated gene editing in *E. coli***

6 Xiaolong Wang<sup>\*1</sup>, Haibo Peng<sup>1</sup>, Chunyan Li<sup>1</sup>, Xuxiang Wang<sup>1</sup>, Gang Chen<sup>1</sup>, Jianye Zhang<sup>1</sup>

7 College of Life Sciences, Ocean University of China, Qingdao, 266003, P. R. China

8

9

---

<sup>1</sup> To whom correspondence should be addressed: Xiaolong Wang, Ph.D., Department of Biotechnology, Ocean University of China, No. 5 Yushan Road, Qingdao, 266003, Shandong, P. R. China, Tel: 0086-139-6969-3150, E-mail: [Xiaolong@ouc.edu.cn](mailto:Xiaolong@ouc.edu.cn).

**Abbreviations used in this article:** *E. coli*: *Escherichia coli*; BLA:  $\beta$ -lactamase; *bla*: BLA gene; HSC: hidden stop codon; PTC: premature termination codon; OE-PCR: overlapping extension polymerase chain reaction; SDS-PAGE: sodium dodecyl sulfate polyacrylamide gel electrophoresis; TCB: tetracycline-containing broth; TCP: tetracycline-containing plate; ACP: ampicillin-containing plate; ACB: ampicillin-containing broth; KCP: kanamycin-containing plate; KCB: kanamycin-containing broth; 2nd NGS: the second-generation high-throughput sequencing; DEG: differentially expressed gene; GO: Gene Ontology; KEGG: Kyoto Encyclopedia of Genes and Genomes; KOBAS: KEGG Orthology Based Annotation System; FPKM: expected number of Fragments PerKilobase of transcript sequence per Millions base pairs sequenced; SNP: Single Nucleotide Polymorphism; InDel: Insertions/Deletion; SV: Structure Variation. DSB: double strand break;

## Abstract

1  
2       Frameshift mutations yield truncated proteins, leading to loss-of-function, genetic  
3 disorders or even death. Reverse mutations, which restore the wild-type phenotype of  
4 a mutant, was assumed to be far rarer than forward mutations. However, in this study,  
5 screening tests showed that the revertants of a frameshift mutation were detected more  
6 frequently than expected in *E. coli*. Sanger sequencing revealed that reverse mutations  
7 were caused not by random mutagenesis but by active targeted gene repair. Molecular  
8 studies suggested that it was the premature termination codons (PTCs) in nonsense  
9 mRNAs that signaled the repair of the frameshift mutation. Genome survey indicated  
10 that the genome sequence of a revertant is not more variable than that of a wild-type  
11 strain. Transcriptome profiling identified differentially expressed genes and pathways  
12 that were upregulated in frameshift or revertant which possibly involved in frameshift  
13 repair, include DNA replication, RNA surveillance, RNA editing, mismatch repair and  
14 homologous recombination. Introducing synthetic DNA or RNA oligonucleotides into  
15 the mutant increased the recovery rates as they promoted the frameshift repair. Based  
16 on these data, we hypothesized a molecular model for frameshift repair referred to as  
17 *nonsense mRNA-mediated gene editing* (NMGE): nonsense mRNAs were recognized  
18 by mRNA surveillance by PTCs signaling, edited by RNA editing and used to direct  
19 the repair of their defective coding gene through mismatch repair and homologous  
20 recombination. In addition, this mechanism also serve as a driving force for molecular  
21 evolution and the widespread presence of frameshift homologs within and across  
22 species is considered as evolutionary evidences preserved in nature.

## 1. Introduction

DNA replication and DNA repair happens daily in cell division and multiplication. DNA damages, point mutations and InDels can be induced by chemical and physical mutagens, such as radiation, pollutants or toxins. In addition, because of the imperfect nature of DNA replication, mutations and InDels also occur spontaneously by replication errors or slipped strand mispairing.

If the length of an InDel is not a multiple-of-three, it causes a frameshift mutation in a protein-coding gene, results in a substantial change of its encoded amino acids in the downstream; in addition, it also often produces a number of nonsense codons and yields truncated and non-functional proteins [1], which may lead to a genetic disorder or even death [2-5]. The transcripts from a frameshifted coding gene are recognized as nonsense mRNAs by mRNA surveillance [6-12], and the nonsense codons emerged in a frameshifted gene or mRNA are called HSCs [1], also known as PTCs [13, 14].

The molecular mechanisms/pathways involved in the repair of DNA damages and point mutations have been intensively studied and well-understood [15], including Mismatch Repair, Base Excision Repair, Nucleotide Excision Repair, Homologous Recombination and Non-Homologous End Joining. The maintenance of the reading frames of coding genes is fundamentally important for cells. However, the molecular mechanism for the repair of frameshift mutation (*frameshift repair*) remains unknown. The reverse mutation phenomenon was discovered as early in the 1960s [16]. Forward and reverse mutation have been both explained by random mutagenesis, and it has been assumed that reverse mutations occur at a far lesser rate than forward mutations. However, here we report that reverse mutations occur more frequently than expected in *E. coli*, and it is not a random mutagenesis but an active targeted gene repair.

## 2. Materials and Methods

### 2.1 Frameshift mutagenesis and back mutation screening

A plasmid containing a frameshifted  $\beta$ -lactamase gene (*bla*), pBR322-(*bla*-), was constructed by site-directed mutagenesis (Fig 1): in plasmid pBR322, a G:C base pair located in the upstream (+136) of the wild-type *bla* gene (*bla*+) was deleted by

1 OE-PCR. Competent cells of *Escherichia coli* strain DH5 $\alpha$  was transformed with  
2 pBR322-(*bla*-), propagated in TCB, and the transformed bacteria were plated on a  
3 TCP to count the total number of bacteria and plated on ACPs to screen for revertants.  
4 The screened revertants were picked and propagated in ACB at 37°C with 200 rpm  
5 shaking and with 1 mL of overnight seed culture in 10 mL ACB, their plasmids DNA  
6 were extracted and their *bla* genes were Sanger sequenced. The recovery rate was  
7 calculated by the number of revertants divided by the total number of bacteria. The  
8 growth rates were evaluated by the duration to reach the later log phase.

## 9 **2.2 Construction and expression of a PTC-free frameshifted *bla***

10 A PTC-free frame-shifted *bla* (denoted as *bla*#) was constructed by an *in vitro*  
11 *readthrough* technique: (1) the *bla*# sequence was derived from *bla*- by replacing each  
12 nonsense codon with a sense codon according to the *in vivo readthrough rules* (Table  
13 1), and adding a stop codon (TAA) in the 3'-end; (2) the *bla*# gene was chemically  
14 synthesized by Sangon Biotech, Co. Ltd (Shanghai), inserted into an expression vector,  
15 pET28a, and transformed into competent cells of *E. coli* strain BL21. The transformed  
16 bacteria were plated on a KCP, the grown transformants were picked and propagated  
17 in KCB, plated on ACPs to screen for revertants. The revertants were subcultured in  
18 ACB to test their growth rates and their *bla* sequences were Sanger sequenced; (3)  
19 The expression of the frameshifted BLA was induced by IPTG. Total protein samples  
20 were extracted, frameshifted BLA was purified by nickel column chromatography and  
21 analyzed by SDS-PAGE. The activity of BLA was measured by iodometry.

## 22 **2.3 Introduction of DNA or RNA oligonucleotides into the frameshift mutant**

23 Competent cells of the frameshift mutant, which contains the defective plasmid  
24 pBR322-(*bla*-), were transformed with a synthetic DNA or RNA oligonucleotides  
25 with a 39-nt wild-type sequence restoring the base pair which was deleted in OE-PCR.  
26 The transformed cells were cultured in TCB at 37°C for 6 hours with 200 rpm shaking,  
27 and then plated on TCPs to count the total number of bacteria, and on ACPs to screen  
28 for the induced revertants, whose *bla* gene were repaired. The induced revertants were  
29 subcultured in ACB to test their growth rates, and their *bla* were Sanger sequenced.  
30 The recovery rate was calculated by the number of revertants divided by the total

1 number of bacteria. The growth rates were evaluated by the duration to reach the later  
2 log phase by culturing at 37°C with 200 rpm shaking and with 1 mL of overnight seed  
3 culture in 10 mL ACB.

#### 4 **2.4 Genomes resequencing and variation analysis of the *E. coli* strains**

5 Genomic DNA samples were extracted from wild-type (*bla*<sup>+</sup>) and revertant (*bla*<sup>\*</sup>)  
6 strains. Library preparation and genome sequencing were conducted by a commercial  
7 service provided by *Novogene Co. Ltd.* The library was sequenced on an Illumina  
8 HiSeq 250PE platform and paired-end reads were obtained. Raw reads in fastq format  
9 were processed by removing the adapter sequence and low quality reads. The clean  
10 reads with high quality were mapped onto the reference genome of *E. coli* K12  
11 MG1655 (NC\_000913.3) to identify SNPs, InDels and SVs of each sample. GATK2  
12 software was used to perform SNP calling. Samtools v0.1.18 was used to sort the  
13 reads and reorder the bam alignments. Circos was used to display the coverage of the  
14 reads and the distribution of SNPs and InDels on the ring diagram. BreakDancer was  
15 used to detect structure variations.

#### 16 **2.5 Transcriptome analysis of the *E. coli* strains**

17 Total RNA samples were extracted from the wild type (*bla*<sup>+</sup>), the frameshift (*bla*<sup>-</sup>)  
18 and the revertants (*bla*<sup>\*</sup>) *E. coli* strains. Library preparation and RNA sequencing  
19 were conducted by a commercial service provided by *Novogene Co. Ltd.* After library  
20 preparation and cluster generation, the library was sequenced on an Illumina HiSeq  
21 platform. The paired-end raw reads were processed by removing the adapter sequence  
22 and low quality reads. The clean reads with high quality were mapped onto the  
23 annotated reference genome, *E. coli* K12 MG1655 (NC\_000913.3), and the  
24 expression levels of each gene were calculated for each sample and compared to each  
25 other to identify DEGs, enriched GO terms and KEGG pathways.

##### 26 (1) *Quantification of gene expression level*

27 Bowtie (v2-2.2.3) was used for index building and aligning the clean reads to the  
28 reference genome. HTSeq (v0.6.1) was used to count the numbers of reads mapped to  
29 each gene. And then FPKM of each gene was calculated based on their lengths and  
30 reads counts.

1 (2) *Differential expression analysis*

2 Prior to differential expression gene analysis, for each strain the read counts were  
3 adjusted by the edgeR program through one scaling normalized factor. Differential  
4 expression analysis of two conditions was performed using the DESeq R package  
5 (1.20.0). The P values were adjusted by the Benjamini & Hochberg method. Corrected  
6 P-value of 0.005 and log<sub>2</sub> (Fold change) of 1 were set as the threshold for  
7 significantly differential expression.

8 (3) *GO and KEGG enrichment analysis of differentially expressed genes*

9 GO enrichment analysis was implemented by the Goseq R package, in which  
10 gene length bias was corrected. GO terms with corrected P-value less than 0.05 were  
11 considered significantly enriched by DEGs. KOBAS 2.0 was used to test the  
12 statistical enrichment of DEGs in KEGG pathways (<http://www.genome.jp/kegg/>).

13 **3. Results and Analysis**

14 **3.1 The growth of the frameshift mutant and the revertants**

15 When a plasmid pBR322 containing a wild-type *bla* gene was transformed into *E.*  
16 *coli*, including strain DH5 $\alpha$  and BL21. The resulting wild-type (*bla*<sup>+</sup>) bacterial cells  
17 grew well on both ACPs and TCPs (Fig 2A, left). One single G:C base pair in the  
18 upstream of *bla* was deleted by OE-PCR. In the frameshifted *bla* (*bla*<sup>-</sup>), seventeen  
19 nonsense codons appeared; the active sites of BLA, including its substrate binding site,  
20 locate all in the downstream of the deletion. Therefore, *bla*<sup>-</sup> was expected to be a  
21 loss-of-function and the transformed bacteria could not grow in ampicillin-containing  
22 media. However, repeatedly a few ampicillin-resistant colonies (Fig 2A, middle) were  
23 observed. The possibility of carryover or cross-contamination was ruled out by means  
24 of a negative or blank control (Fig 2A, right). So, they were revertants (*bla*<sup>\*</sup>) whose  
25 *bla*<sup>-</sup> was repaired by a reverse mutation.

26 In addition, although most of the revertants can grow in ACB, the growth rates of  
27 different revertants varied greatly and are often much slower when compared to the  
28 wild-type strain: by culturing at 37°C with 200 rpm shaking, it took the wild type 12

1 to 24 hrs. to reach the late log phase, while it took the revertants up to 36 to 48 hrs. to  
2 grow, and many of the revertants failed to grow in ACB.

3 Hitherto, it seems that there is nothing unusual, since reverse mutations are very  
4 common phenomenon. Both forward and reverse mutation have been explained by  
5 random mutagenesis (Fig 3A): in DNA replication, natural or induced mutations occur  
6 randomly, forward mutations cause defective mutants or a loss-of-function, and  
7 reverse mutations restore the wild-type phenotype. In the above tests, the revertants  
8 survived only because they were 'lucky': their *bla*- gene coincidentally restored by a  
9 reverse mutation, while most of the other bacteria died without a back mutation.

### 10 **3.2 A reverse mutation is not a random mutagenesis but a targeted gene repair**

11 The model for reverse mutation based on random mutagenesis sounds faultless.  
12 However, in a 'thought experiment', we noticed that the model is indeed inconsistent:  
13 (1) in the model, a bacterium survived if its defective *bla* gene was restored through  
14 random mutagenesis. However, a reverse mutation must occur in a process of DNA  
15 replication or repair in a living cell. Since the frameshift mutant itself could not live in  
16 ampicillin, a reverse mutation must have already occurred in a cell before the adding  
17 of ampicillin. (2) In *E. coli*, forward mutations occur at a very low rate ( $\sim 10^{-6}$ ~ $10^{-8}$  per  
18 locus per generation). It was assumed that reverse mutations occur at a far lesser rate  
19 than forward mutations. The reverse mutation rate for a certain frameshift mutation  
20 should be orders of magnitudes lower than the forward mutation rate if it depends on  
21 random mutagenesis. (3) The bacterial genome consists of millions of base pairs, and  
22 thousands of genes. If the cells did not 'know' which gene was defective, there would  
23 be little chance to repair it through random mutagenesis. Therefore, reverse mutation  
24 should be far lesser than a forward mutation. However, in fact the revertants can  
25 always be detected by a routine screening test, so reversions occur much more  
26 frequently than expected. The average recovery rate measured in DH5 $\alpha$  is  $2.61 \times 10^{-8}$ ,  
27 which is comparable to the baseline forward mutation rate; in BL21, however, it  
28 reaches up to  $1.19 \times 10^{-7}$ , which is ~10-fold higher than the baseline.

29 Therefore, it is rather suspectable that biology relies on random mutagenesis, a  
30 simple but uncertain strategy, to address this important issue. It is more likely that a

1 specific mechanism has been developed for frameshift repair in the history of life. In  
2 summary, the reversion of a frameshift mutation is not like a random mutagenesis but  
3 more like an active, and targeted, gene repair. However, how is a frameshifted gene  
4 identified and repaired at the molecular level? So far, it is still unknown.

### 5 **3.3 Sanger sequencing of the *bla* genes of the revertants**

6 To further investigate how a frameshift gene was repaired, the revertants were  
7 picked and propagated in ACB. Their plasmids DNA were extracted and sequenced  
8 by the Sanger method. Unexpectedly, in the initial revertants, the *bla* sequence read  
9 automatically from their Sanger sequencing diagrams are often neither a wild type nor  
10 a reverse mutation, but a frameshift (Fig 4A, top). These revertants were subcultured  
11 in ACB, some survived and some not. The initial revertants usually grow very slowly,  
12 but the survived subcultures grow faster and faster.

13 In the later subcultures, the *bla* sequences read automatically from their Sanger  
14 sequencing diagrams are often still a frameshift, but their sequencing diagrams often  
15 contain two (or three, or more) sets of superposed peaks (Fig 4A, middle), indicating  
16 that they consist of two (or three or more) types of *bla* sequences, one is the original  
17 frameshifted and the other ones are the repaired. Finally, in some of the fast-growing  
18 subcultures, most of their *bla* copies were repaired (Fig 4A, bottom).

19 The repaired *bla* sequences of the revertants (*bla*\*) were read from the secondary  
20 peaks in the Sanger diagrams artificially. By aligning the *bla*\* sequences against the  
21 *bla*<sup>+</sup> and *bla*<sup>-</sup> sequence, it was indicated that they contain a variety of InDels and  
22 substitutions, especially G:C→A:T transitions (Fig 4B, top), and their encoded amino  
23 acid sequences are different from the sequence of the wild-type BLA (Fig 4B, bottom).  
24 Moreover, they often still contain a certain number of stop codons. In other words, the  
25 frameshifted gene (*bla*<sup>-</sup>) was not restored completely, but partially and progressively,  
26 resulting in a variety of frameshifted variants called *frameshift homologs*.

27 The tetracycline-resistant gene (*tcr*) in the same plasmid was also sequenced by  
28 Sanger method, while no obvious overlapping peak was observed in their sequencing  
29 diagrams. Therefore, the high-level variants observed in *bla* is not a result of random  
30 mutagenesis, but more like a gene repair targeting specifically to the *bla* gene.



### 1 **3.4 The genome of the revertant is not more variable than the wild-type**

2 A mutator strain, such as *E. coli* strain mutD5, has an extraordinary high rate of  
3 spontaneous mutagenesis over their whole genome due to its defective proofreading  
4 and mismatch repair during DNA replication [17]. To clarify further whether the *bla*  
5 variants are the results of whole-genome random mutagenesis, the genome sequences  
6 of a wild type (*bla*<sup>+</sup>) and a revertant (*bla*<sup>\*</sup>) were sequenced by 2<sup>nd</sup> NGS sequencing.  
7 As shown in Fig 4C-4D, Table 2-3, the SNP/InDel levels of the tested revertant is not  
8 higher but even lower than that of the wild-type, suggesting that the genome of the  
9 revertant was not more variable than that of the wild-type strain, suggesting that the  
10 proofreading/mismatch repair system of the revertant was not defective and it adopted  
11 a stringent strategy in DNA replication. Therefore, the high level of variants observed  
12 in the *bla* genes of the revertants is not a result of whole-genome random mutagenesis,  
13 but an active gene repair targeting specifically to the *bla* gene.

14 In addition, genome structures analysis shows that there are quite some structure  
15 variations (SVs) in both two genomes tested (Fig 4E). However, most of the SVs size  
16 in 100~200 bp, which equals approximately to the length of the reads, therefore, they  
17 were considered as falsely-mapped reads rather than true structure variations. As well  
18 known, the 2<sup>nd</sup> NGS platforms can have several limitations, such as short read-length  
19 and amplification bias, posing serious problems in genome assembly, mapping and  
20 structures analysis [18]. However, thanks to the extremely high depth of sequencing  
21 of the 2<sup>nd</sup> NGS, the SNP/InDel data is considered valid and reliable.

### 22 **3.5 PTCs signaled the repair of the frameshift mutation**

23 We speculated that it was the PTCs presented in nonsense mRNAs that signaled  
24 the repair of the frameshift mutation. To validate this idea, a *PTC-free bla*<sup>-</sup> (denoted  
25 as *bla*<sup>#</sup>) was derived from *bla*<sup>-</sup> by replacing each nonsense codon with an appropriate  
26 sense codon in accordance with the *readthrough rules* (Table 1). The *bla*<sup>#</sup> gene was  
27 synthesized chemically, cloned in the plasmid vector pET-28a and expressed in *E. coli*  
28 strain BL21. A ~34-kDa band was detected by SDS-PAGE (Fig 5A), representing the  
29 product expressed from the frameshifted *bla*<sup>#</sup>. No lactamase activity was detected by  
30 iodimetry test of the product (Fig 5B).

1       The *bla#* gene of the transformants were Sanger sequenced, while few variations  
2 were detected. The *bla#* transformants were plated on ACPs, but no revertant was  
3 observed. In summary, the *bla#* gene was kept unchanged and a dysfunctional product  
4 was expressed in its wrong reading frame. The only difference between *bla-* and *bla#*  
5 is: the former gene consists of a certain number of nonsense codons, but the latter one  
6 does not; therefore, it must be the PTCs appeared in the transcripts (nonsense mRNAs)  
7 that signaled the repair of the frameshift mutation in *bla-*.

### 8 **3.6 Identifying genes/proteins involved in frameshift repair**

9       We speculated that frameshift repair requires the upregulation of relevant genes,  
10 proteins and pathways. By transcriptomes sequencing and profiling, 292 or 247 genes  
11 displayed upregulated transcriptions ([Supplementary dataset 1-2](#)), 65 or 58 pathways  
12 were identified as upregulated in the pathway enrichment analysis ([Supplementary](#)  
13 [dataset 3-4](#)), respectively in the frameshift (*FS*) or revertant (*RE*) when compared to  
14 the wild-type (*W*). As shown in [Fig 6B-6C](#) and [Table 4-5](#), we manually selected  
15 upregulated pathways that are probably involved in frameshift repair, including *DNA*  
16 *replication* ([Fig 6D](#)), *RNA surveillance/processing* ([Fig 6E](#)), *mismatch repair* and  
17 *homologous recombination* ([Fig 6F](#)).

18       In addition, by carefully inspecting the list of upregulated genes, we noticed that  
19 the cytosine or isoguanine deaminase gene (*codA*) was significantly upregulated in the  
20 frameshift. CodA catalyzes the hydrolytic deamination of cytosine to uracil. CodA  
21 also catalyzes deamination of isoguanine, a mutagenic oxidation product of adenine in  
22 DNA, and of isocytosine. As mentioned above, Sanger sequencing suggested that the  
23 repaired *bla* contains many G:C→A:T substitutions, suggested that they were derived  
24 from deamination of DNA bases. It has been reported that deamination of DNA bases  
25 generates deoxyinosine from deoxyadenosine and links mismatch repair and RNA  
26 editing [19]. Here we found that the deaminase and the mismatch repair pathway were  
27 both upregulated in the frameshift, suggesting that RNA editing and mismatch repair  
28 were probably both involved in the frameshift repair. However, further experimental

1 investigations are needed to validate the regulation and the function of these genes in  
2 the repair of frameshift mutations.

### 3 **3.7 A new model for frameshift repair: nonsense mRNA-mediated gene editing**

4 At present, the mechanism for the recognition and repair of frameshift mutation is  
5 unknown at the molecular level. However, we postulated that the transcribed nonsense  
6 mRNAs must be involved, because PTCs cannot function in a double helix DNA but  
7 can only in a translating nonsense mRNA.

8 We conducted an in-depth survey of previous studies that covered a wide range of  
9 prokaryotic and eukaryotic organisms. We put these fragmentary evidences together  
10 by presuming that the underlying mechanism of frameshift repair is highly conserved  
11 among prokaryotic and eukaryotic species. Based on our and others studies, here we  
12 hypothesized a molecular model for frameshift repair, *nonsense mRNA-mediated gene*  
13 *editing* (NMGE), consisting four main steps (Fig 3B):

14 (1). ***Nonsense mRNA recognition/processing***: When a nonsense mRNA is translated,  
15 the ribosome is blocked when it encounters a PTC [20]. In both prokaryotes and  
16 eukaryotes, *nonsense-mediated mRNA decay* (NMD) is the best-studied nonsense  
17 mRNA processing pathways [21-23]. NMD targeting mRNAs harboring PTCs for  
18 degradation enhances their decay rate and reduces the abundance of the mRNA  
19 transcribed from that gene. It has been reported that, in eukaryotes, NMD uses the  
20 presence of the exon junction complex (EJC) in the downstream of a nonsense  
21 codon as a second signal to distinguish a PTC from a true termination codon [24].  
22 In bacterial cells, mRNA quality is also tightly controlled but it is not yet clear  
23 how the nonsense mRNAs are processed [25]. Factors that regulate NMD include  
24 three interacting proteins, UPF1, UPF2 (also known as NMD2) and UPF3, which  
25 were encoded by highly conserved genes originally identified in yeast [26, 27]. In  
26 addition to NMD, nonsense mRNAs are also subject to other mRNA processing  
27 pathways, including *nonsense-mediated alternative splicing*, *nonsense-mediated*  
28 *translational repression* or *nonsense-mediated transcriptional silencing*.

29 (2). ***RNA editing***: as described in the above, nonsense mRNAs must be involved in  
30 the recognition and repair of the frameshift mutation. Since a nonsense mRNA by

1 itself is defective and it cannot template the gene repair directly, we assumed that  
2 the nonsense mRNAs were functionalized by editing prior to templating the gene  
3 repair. RNA editing has been studied extensively and intensively [28-32], and the  
4 mechanisms of RNA editing, such as insertion/deletion of uridine [33], has been  
5 reported in kinetoplastid, trypanosome [34] and human [35], suggesting that the  
6 molecular mechanisms for RNA editing are widely exists and highly conserved.  
7 In particular, the *apoB* mRNA editing complex suppresses NMD [36], suggesting  
8 that sometimes nonsense mRNAs are subjected to RNA editing instead of NMD.  
9 As described above, in the revertants, different types of bases were substituted,  
10 inserted or deleted in the *bla* gene. These editing events are located mostly near to,  
11 or in the downstream, but not in the distant upstream of the base pair deleted in  
12 the mutagenesis (Fig 4A-4B). This phenomenon can be explained by the PTCs in  
13 the nonsense mRNAs: the PTCs presented in the downstream of the deletion not  
14 only signal the recognition of nonsense mRNA but serve as flags for RNA editing.  
15 Therefore, the frameshifted gene might be repaired through editing the nonsense  
16 mRNAs rather than repair the coding sequence directly. A cell can recognize the  
17 nonsense mRNAs by PTC signaling, but it might be impossible to locate the site  
18 of the frameshift-causing InDel exactly, so it is not always possible to restore the  
19 original coding sequence. Therefore, the cell must insert, delete and/or substitute  
20 nucleotides randomly within or nearby the PTCs, resulting in a variety of variants  
21 (frameshift homologs). In a word, by PTC-signaling, mRNA editing is restricted  
22 near to or in the downstream of the InDel in the nonsense mRNAs, so that DNA  
23 editing will also be restricted in the right regions in the target coding sequence.

24 (3). ***Nonsense mRNA translation:*** After RNA editing, the translation of the nonsense  
25 mRNA restarted. If existed, the remaining PTCs were readthrough by translating  
26 each of them into an appropriate amino acid [37-41]. If the target gene is essential,  
27 a cell survives if and only if it obtained an mRNA encodes a functional protein.  
28 By transcription, each copy of the target gene produces many copies of nonsense  
29 mRNAs, and thus, the probability of producing a functional protein by mRNA  
30 editing is significantly better than that of random mutagenesis in its coding DNA.

1 It was reported that frameshifted or nonsense protein-coding genes are sometimes  
2 still functional by expressing through certain mechanisms, such as *translational*  
3 *readthrough* [42-45] and *ribosomal frameshifting* [46-54]. Mutations in *upf* genes  
4 caused nonsense suppression and subsequent translational readthrough in yeast  
5 and 5~20 fold decreases in the rates of NMD [55], simultaneously, suggested a  
6 direct link between NMD and nonsense suppression. The three Upf proteins all  
7 interact with Sup35, and Upf1 interact with Sup45 (eRF1), a second release factor,  
8 and binding of a SMG-1-Upf1-eRF1-eRF3 (SURF) complex to EJC triggers Upf1  
9 phosphorylation and NMD [56]. In addition, the nonsense suppression caused by  
10 *upf* mutations is additive to those by *sup35* and *sup45* mutations [57], suggesting  
11 that nonsense suppression is a nonsense mRNA processing pathway alternative to  
12 NMD. Therefore, when NMD is inhibited, nonsense mRNAs can be translated by  
13 nonsense suppression and translational readthrough.

14 (4). ***RNA-directed gene editing***: A cell survived when it obtained a functional protein  
15 by editing and translation of the nonsense mRNAs. The edited mRNAs were then  
16 transported back into the nucleus (or plasmid) to localize and direct the repair of  
17 its own coding gene. Although this molecular process is unknown in details, the  
18 mismatch repair and the homologous recombination pathways must be involved,  
19 as they were both upregulated in the frameshift and the revertants (Fig 6F).

### 20 3.8 ***The NMGE model better explains the growth of the revertants***

21 As mentioned above, the frameshift repair is not a sudden event but a progressive  
22 process, the growth rate of a revertant changes and those of different revertants vary.  
23 Interestingly, the sizes of the wild-type colonies are uniform (Fig 2), showing that  
24 their growth rates are uniform; while the sizes of the revertant colonies varied greatly  
25 (Fig 7A), indicating that their growth rates differed due to the activities of their BLA  
26 were diversified. Comparing with the random mutagenesis model, NMGE can better  
27 interpret the diversified growth rates of the revertants and the high-level variations  
28 observed in their *bla* genes, but not in the other genes in their genome or the plasmid:

29 (1). In the initial revertants, their *bla* genes were still frameshifted, they survive  
30 can be explained in three possible ways: (a) the frameshifted *bla* is translated

- 1 by ribosomal frameshifting, produced a wild-type BLA; (b) the frameshifted  
2 *bla* is translated by translational readthrough, produced a frameshifted but  
3 functional BLA; or (c) the initial slowly-growing revertants may also contain a  
4 few copies of repaired *bla*, but the proportion of the repaired *bla* was too low  
5 to be detected by Sanger sequencing. As pBR322 is a multi-copy plasmid, it  
6 might be sufficient to support the survival of the host cell in ACM even when  
7 only a small proportion of its copies were repaired. Because these mechanisms  
8 are very time- and resource-consuming, so that the host bacteria grow very  
9 slowly, and many of them died if their *bla* was not repaired soon.
- 10 (2). By NMGE, their *bla* were repaired progressively, not only before but also after  
11 the adding of ampicillin. Ampicillin is the substrate of BLA, it is neither the  
12 cause nor the terminator of the gene repair, but a selection pressure to screen  
13 and display the revertants (the result of repair).
- 14 (3). NMGE is signaled by the PTCs presented in the *bla* nonsense mRNAs, and the  
15 aim of NMGE is to eliminate the PTCs. In the frameshifts, there were many  
16 PTCs in the *bla* mRNAs, the probability of producing a functional product by  
17 mRNA editing is very low, so that their growth rate is very slow and their  
18 survival rate is very low, as most of them died before their *bla* were repaired.
- 19 (4). In the latter revertants, their *bla* were repaired by NMGE, with more and more  
20 nonsense codons were replaced by sense codons, fewer and fewer stop codons  
21 remained, and thus, gene repairing become easier and easier and their growth  
22 rates become faster and faster.
- 23 (5). Finally, gene repair completed when all nonsense codons were eliminated. The  
24 *bla* coding sequence was recovered, not necessarily the same as the wild-type,  
25 but consist of a variety of variants.

26 Previously, we reported that frameshift homologs are widespread within and  
27 across species, as the genetic code was optimized to tolerate frameshifting [58]. This  
28 study further demonstrated that it is the PTCs that signaled the frameshift repair.  
29 Frameshift mutations occurred in a coding gene are repaired through NMGE,  
30 resulting in a variety of frameshift homologs. Therefore, the widespread presence of

1 frameshift homologs is considered as evolutionary evidences for this model preserved  
2 in nature. In short, NMGE is not only a mechanism for frameshift repair but also a  
3 driving force for molecular evolution.

### 4 **3.9 Both DNA and RNA efficiently direct the repair of frameshift mutation**

5 Synthetic DNA oligonucleotides or DNA/RNA complexes have been widely used  
6 for targeted gene repair [59-61]. And it has also been reported that synthetic RNA or  
7 endogenous transcripts can direct the repair of double-strand breaks of DNA [62-67].  
8 We postulated that a synthetic wild-type RNA could also direct the frameshift repair if  
9 the above NMGE model is correct. To validate this, competent cells of the frameshift  
10 mutants (*E. coli* strain DH5 $\alpha$  or BL21) were transformed by heat-shock at 42 °C with  
11 a 39-nt synthetic sense (ss-), antisense (as-) or double-stranded (ds-), DNA or RNA  
12 oligonucleotides with a wild-type (WT) or mutated (MT) sequence to recover the base  
13 which was deleted in the OE-PCR. The recovery rate ( $f_r$ ) was very low and unstable in  
14 DH5 $\alpha$ , but much higher and more stable in BL21. We performed statistics analysis on  
15 the data of BL21. As shown in Fig 7A-7B, in the control or heat-shock groups,  $f_r$  was  
16  $1.19\sim 1.30\times 10^{-7}$ . When an ss-, as- or ds-DNA oligo was added,  $f_r$  increased compared  
17 with the control groups.  $f_r$  increased 1~2 fold in ss-DNA group, 3~6 fold in as-DNA  
18 group and 2~4 fold in ds-DNA group. These data are consistent with previous studies  
19 reported that both as- and ss-DNA can induce DNA-directed targeted gene repair [68].  
20 Wild-type (WT) ss-RNA caused 0.5-fold decrease of  $f_r$ . Surprisingly, however, the  
21 mutated (MT) ss-RNA promoted the gene repair and caused 2~5-fold increase of  $f_r$  in  
22 BL21, which is consistent with our expectation. No or few revertants were observed  
23 in asRNA group, probably due to asRNA can silence the transcripts and result in the  
24 death of the host;

25 For each group, more than one hundred repaired *bla* genes were sequenced. The  
26 Sanger diagram showed that a designed base was inserted into the repaired *bla* gene in  
27 both the ssDNA (Fig 7C) and the ssRNA group (Fig 7D). In the ssDNA or ssRNA  
28 group, the type of the insertion base is mostly consistent with the designed type, and  
29 the insertion was located exactly at the site of deletion; in the control group, however,

1 the type and location of the inserted base are both unpredictable, suggesting that, like  
2 DNA, RNA by itself can also direct targeted gene repair.

3 Homologous recombination must play an important role in frameshift repair, as  
4 the average recovery rate measured in BL21 (*recA*<sup>+</sup>) is significantly higher than that  
5 of DH5 $\alpha$  (*recA*<sup>-</sup>). However, the DNA- or RNA-induced recovery rates were increased  
6 both in BL21 and DH5 $\alpha$ , suggesting that homologous recombination is not the only  
7 pathway responsible for frameshift repair. In all DNA, RNA and control groups,  
8 G:C→A:T substitutions were often observed in the repaired *bla* (Fig 7B); in addition,  
9 in the ssRNA group, not only G:C→A:T substitutions were often observed, but also a  
10 ssRNA designed with an G→A substitution efficiently introduced the substitution into  
11 the repaired *bla* (Fig 7C), resulted in an increased recovery rate, which is even higher  
12 than that of the wild-type ssRNA (Fig 7B), suggesting that mismatch repair and/or  
13 RNA editing might be involved in the repair.

#### 14 **4. Discussion**

##### 15 ***4.1 A mechanism for the repair of frameshift mutations***

16 The molecular mechanisms for the repair of DNA damage and point mutations  
17 have been well studied [15], however, so far no mechanism specifically designed for  
18 the repair of frameshift mutations has been discovered. This NMGE mechanism not  
19 only well explains our observations but is supported by many previous studies.

20 When a frameshift mutation occurs in a protein-coding gene in a cell, by NMGE,  
21 the cell does not edit the defective gene directly, but edit the transcripts first and then  
22 use an edited mRNA to direct the gene repair. This is very surprising, but in fact it is  
23 more reasonable than direct gene editing: to repair a frameshifted coding gene, it must  
24 be transcribed and recognized by RNA surveillance, because in principle a frameshift  
25 mutation cannot be recognized at the genomic-DNA level; therefore, the transcripts  
26 (nonsense mRNAs) must be functionalized through RNA editing prior to directing the  
27 repair of their own coding gene.

28 To repair a frameshifted gene by NMGE, as shown in, there exist two possible  
29 strategies (Fig 3B): (1) *direct NMGE*: use an original nonsense mRNA to identify the



1 frameshifted coding gene, and then edit the defective gene by DNA-level mutagenesis;  
2 however, the edited coding gene must be transcribed and translated for a second round  
3 to check whether it is repaired or not; (2) *indirect NMGE*: the nonsense mRNAs are  
4 first edited, an edited mRNA is translated by translational readthrough, transported to  
5 identify the coding gene, and then used to template gene repair. Obviously, compared  
6 to the direct strategy, the indirect NMGE is more reasonable and more efficient, as the  
7 gene repair happens only when a functional mRNA has been obtained.

#### 8 **4.2 Evidences for the connection of DNA repair and RNA editing**

9 All types of RNAs are subject to either degradation or processing and a variety of  
10 molecular/cellular mechanisms are involved in RNA processing [69]. In the last few  
11 decades, studies have established a link between DNA repair, RNA surveillance and  
12 processing. For example, several proteins that respond to DNA damage, such as base  
13 excision repair enzymes, SMUG1, APE1 and PARP1, have been shown to participate  
14 in RNA surveillance and processing [70].

15 Deamination is the removal of an amine group from a molecule. Enzymes that  
16 catalyze this reaction are called deaminases. Deamination of DNA bases generates  
17 deoxyinosine from deoxyadenosine, create missense mutations predisposing humans  
18 to cancer and interfere with other basic molecular genetic processes. Cytidine  
19 deamination was discovered as a mechanism of editing mRNA transcripts first in  
20 eukaryotes [71, 72]. The recent identification of tRNA-specific adenosine deaminases  
21 (ADATs) has led to the suggestion that these enzymes, as well as the cytidine and  
22 adenosine deaminases acting on pre-mRNAs (CDARs and ADARs), belong to a  
23 superfamily of RNA-dependent deaminases [73]. The original and best-characterized  
24 example of C→U editing is the apolipoprotein B (apoB) mRNA, in which a single,  
25 site-specific cytidine deamination introduces a stop codon (UAA) into the reading  
26 frame of the edited transcript, leading to production of the shortened isoform, apoB48.  
27 This occurs exclusively in the human small intestine, where apoB48 is required for  
28 the absorption of dietary lipid [74]. At present, it has been well known that RNA

1 editing by base deamination plays many important roles and aberrant or dysregulated  
2 RNA editing might contribute to genomic instability in cancer [75].

3 In addition, several studies have provided evidences that deamination is related to  
4 both DNA repair and RNA editing. For example, endonuclease V, which is highly  
5 conserved from *E. coli* to human [19], is also involved in excision repair that removes  
6 deoxyinosine from DNA. It is reported that human endonuclease V, localized to the  
7 cytoplasm, is also a ribonuclease specific for inosine-containing RNA, hydrolyses the  
8 second phosphodiester bond located in the 3' to the inosine in unpaired regions in the  
9 double-stranded RNA, and controls the fate of inosine-containing RNA in humans  
10 [19]. In addition, editing of the pre-mRNA for DNA repair enzyme NEIL1 causes a  
11 lysine to arginine change in the lesion recognition loop of the NEIL1 protein, and the  
12 recoding site is a preferred site for the RNA editing adenosine deaminase ADAR1  
13 [76]. Moreover, it has been reported that engineered fusions of CRISPR/Cas9 and a  
14 cytidine deaminase enzyme mediated the conversion of cytidine to uridine, effecting a  
15 C→T or G→A substitution [77]. These studies all suggested a direct link between the  
16 regulation of mismatch repair and RNA editing. In the above, we demonstrated that  
17 the repaired *bla* in the revertants often contains many C→T (or G→A) substitutions,  
18 and the cytidine deaminase and the mismatch repair genes were both upregulated in  
19 the frameshift mutant and revertant tested. We therefore speculate that both mismatch  
20 repair and RNA editing are involved in frameshift repair.

#### 21 ***4.3 NMGE is not equivalent to RNA-directed DNA Repair***

22 As is well known, RNA is transcribed in the nucleus and then transported to the  
23 cytoplasm [78]. Recently, there are growing evidences suggesting that RNAs can be  
24 transported back to the nucleus to repair DNA double strand breaks (DSBs), a process  
25 known as *RNA-directed DNA Repair*. Not only a synthetic DNA/RNA hybrid, but also  
26 a RNA-only oligonucleotide can serve as a template for DNA synthesis for the repair  
27 of a DSB in a homologous DNA. It was reported that short RNA patches can direct  
28 modifying DNA in *E. coli* [79, 80], yeast [66, 67] and human embryonic kidney  
29 (HEK-293) cells [80]. To our knowledge, however, this is the first report that, RNA by

1 itself can direct precise and targeted repair of a frameshift mutation. At present, we  
2 are further investigating on how RNA guides the targeted gene repair.

3 NMGE depends on, but is not equivalent to, RNA-directed DNA Repair, since it  
4 is signaled by PTCs and the nonsense mRNAs are edited prior to directing the repair  
5 of the target coding DNA sequence. As mentioned in the above, there are many  
6 evidences suggest a direct or close link between RNA editing and DNA repair, which  
7 can support this NMGE model. However, further systematic investigations are needed  
8 to elucidate this process in details and validate it in other species.

#### 9 ***4.4 The possibility of RNA-only gene or genome editing***

10 CRISPR/Cas9 for RNA-guided genome editing [81-83] has been widely used for  
11 the introduction or correction of specific mutations [84, 85], which can potentially be  
12 used in gene therapy to repair a disease-causing frameshift/point mutation. However,  
13 RNA-guided genome editing requires the transfection of foreign genes in the host cell.  
14 On the other hand, deoxyoligonucleotides-based targeted gene repair (ODN-TGR) [59,  
15 60] could be more favorable in human and animal due to its non-transgenic properties.  
16 Unfortunately, however, it suffered from inefficiency and uncertainty because it relies  
17 on the induction of the endogenous DNA repair system while it is suppressed by the  
18 mismatch repair mechanisms [61].

19 In addition, synthetic DNA oligonucleotides or DNA/RNA complexes have been  
20 widely used for targeted gene repair [59-61]. And it has also been reported that  
21 synthetic RNA or endogenous transcripts can direct the repair of double-strand breaks  
22 of DNA [62-67], but it has never been reported that endogenous mRNAs can be  
23 edited and used to direct targeted gene repair, either spontaneously or induced by a  
24 synthetic RNA. Since the essential components of this NMGE model, the endogenous  
25 pathways, including mismatch repair, homologous recombination and RNA editing,  
26 are probably highly conserved from bacteria to human, so it is potentially useful for  
27 targeted gene and genome editing using RNA-only molecules without introducing any  
28 exogenous gene or protein.

## 1 **Author Contributions**

2 Xiaolong Wang conceived the study, designed the experiments, analyzed the data and  
3 wrote the paper; Chunyan Li, Haibo Peng, Xuxiang Wang and Yalei Wang performed the  
4 experiments; Quanjiang Dong, Gang Chen and Jianye Zhang provided materials, equipment,  
5 give suggestions and discussed on the paper.

## 6 **Acknowledgements:**

7 This study was supported by The *National Natural Science Foundation of China* (Grant  
8 No. 81072567).

## 9 **Figure legends**

10 **Fig 1. The introduction of a frameshift mutation in the upstream of *bla* in the plasmid**  
11 **pBR322.** Sanger sequencing diagram of: (A) the wild type (*bla*<sup>+</sup>); (B) the frameshift mutant (*bla*<sup>-</sup>).  
12 (C) Alignment of the nucleotide sequence of t *bla*<sup>+</sup> and *bla*<sup>-</sup>.

13 **Fig 2. Growth of *E. coli* on ACPs and TCPs:** *bla*<sup>+</sup>: Wild-type; *bla*<sup>-</sup>: Frameshift; *bla*<sup>\*</sup>: revertants;  
14 *blank*: Blank control

15 **Fig 3. Two different models for the repair of frameshift mutations:**

16 (A) The traditional “*random mutagenesis*” model: **Left:** when a frameshift mutation occurred in  
17 a coding gene, a certain number of HSCs/PTCs (*red bars*) emerged in the CDS, as well as in the  
18 nonsense mRNAs, caused *translational termination*, resulting in truncated products; **Right:** when  
19 the coding sequence is repaired by a *reverse mutation* due to random mutagenesis, the reading  
20 frame is restored, the stop codons are hiding (*green bars*), and the translation proceed;

21 (B) This nonsense-mediated gene editing (NMGE) model: **Left:** Signaled by the PTCs (*yellow*  
22 *bars*), nonsense mRNAs were identified by *mRNA surveillance*, and processed by *translational*  
23 *termination* and *mRNA decaying*; **Middle:** Some nonsense mRNAs can also be repaired by *RNA*  
24 *editing*; **Top:** original/edited mRNAs were transported to identify and repair the defective coding  
25 gene, stop codons (*green bars*) are hiding, the reading frame restored partially, and the translation  
26 proceed, the remaining stop codons are readthrough; **Right:** the coding gene is repaired partially,  
27 producing functional mRNAs and proteins, and so the host recovered gradually.

28 **Fig 4. Sanger Sequencing and sequence analysis of the *bla* gene of the revertants:**

29 (A) The Sanger diagram of *bla*: **Top:** in the initial revertants, most *bla* was still frameshifted;  
30 **Middle:** in the later subcultures, sequencing diagram contains two sets of overlapped peaks, one  
31 is frameshifted *bla*, the other is repaired; **Bottom:** in the final subcultures, most of their *bla* were  
32 repaired;

1 (B) Alignment of the wild-type, the frameshifted and the repaired *bla* coding sequence (top) and  
2 their translated proteins sequence (bottom): *bla* coding sequence were read artificially from the  
3 secondary peaks of the Sanger diagram of the revertants and their subcultures. *bla*: wild-type;  
4 *bla*-: frameshift; A-E: different revertants; *red box*: the base deleted in the OE-PCR; *blue boxes*:  
5 bases inserted or deleted in the revertants;

6 (C) Circos view of the genome sequences of the revertant and the frameshift;

7 (D) The distribution of SNPs/InDels on the genome of wild-type and revertants;

8 (E) The reported “structure variations (SVs)” in the genome of wild-type and revertants;

9 **Fig 5. Expression of the PTC-free frameshifted *bla* (*bla*%) in pET28a-*bla* in *E. coli* BL21:**

10 (A) SDS-PAGE detection of the frameshifted BLA; Lane 1: uninduced; lane 2: induced by 1M  
11 IPTG; lane 3: uninduced superficial ultrasound crushing; lane 4: induced by ultrasonic breakdown  
12 of the supernatant; lane 5: the ultrasonic crushing of the uninduced precipitate; lane 6: the  
13 ultrasonic crushing of the precipitate induced;

14 (B) Detection of  $\beta$ -lactamase activity by iodimetry: (1) *E. coli* BL21/pET28a-*bla*- caused fading,  
15 suggesting that their *bla*- was repaired, produced active  $\beta$ -lactamase, transformed ampicillin into  
16 penicillium thiazole acid, which compete with starch for iodine; (2) *E. coli* BL21/pET28a-*bla*##  
17 expressed a frameshifted product (BLA#), but did not cause fading, suggesting that the product is  
18 not active, and that *bla*## was not repaired; (3) The negative control (*E. coli* BL21), no  $\beta$ -lactamase,  
19 no fading.

20 **Fig 6. The transcriptome analysis of different *E. coli* strains:** *W\_1*: wildtype; *FS\_2*: frameshift;  
21 *R\_3*: initial revertant; *RE\_4*: subculture of a revertant; (A) The number of differential expression  
22 genes (DEGs) and the cluster analysis of DEGs; (B) the most enriched GO terms by comparing  
23 the frameshift (*FS\_2*) with the wild type (*W\_1*); (C) the most enriched GO terms by comparing  
24 the revertant (*R\_3*) with the frameshift (*FS\_2*); (D) Genes upregulated in the RNA  
25 degradation/processing pathway; (E) Genes upregulated in the mismatch repair and homologous  
26 recombination pathway.

27 **Fig 7. Targeted repair of the frameshift mutation induced by DNA or RNA oligonucleotides.**

28 (A) Both ssDNA and ssRNA oligonucleotides can induce the repair of the frameshift mutation; (B)  
29 The numbers of revertants increase with the concentration of ssDNA and ssRNA oligonucleotides;  
30 (C) Sanger sequencing diagram of the DNA-induced revertants; (D) Sanger sequencing diagram  
31 of the RNA-induced revertants;

32

Premature termination codons signaled frameshift repair

1

2

Table 1. The natural suppressor tRNA for nonsense mutations (the *readthrough rules*).

| Site        | tRNA<br>(AA) | Wild type |           | Correction |           |
|-------------|--------------|-----------|-----------|------------|-----------|
|             |              | Code      | Anti-code | Code       | Anti-code |
| <i>supD</i> | Ser (S)      | → UCG     | CGA←      | → UAG      | CUA←      |
| <i>supE</i> | Gln (Q)      | → CAG     | CUG←      | → UAG      | CUA←      |
| <i>supF</i> | Tyr (Y)      | → UAC     | GUA←      | → UAG      | CUA←      |
| <i>supG</i> | Lys (K)      | → AAA     | UUU←      | → UAA      | UUA←      |
| <i>supU</i> | Trp (W)      | → UGG     | CCA←      | → UGA      | UCA←      |

3

4

Table 2. The summary of InDel in the *bla+/-* genome

| Sample      | Insertion | Deletion | Het | Hom | HetRate(%) | Total |
|-------------|-----------|----------|-----|-----|------------|-------|
| <i>bla+</i> | 2         | 4        | 0   | 6   | 0          | 6     |
| <i>bla-</i> | 2         | 3        | 0   | 5   | 0          | 5     |

6

7

8

Table 3. The summary of SNP in the *bla+/-* genome

| Sample      | ts | tv | ts/tv | Het | Hom | HetRate(%) | Total | Density(SNP/Kb) |
|-------------|----|----|-------|-----|-----|------------|-------|-----------------|
| <i>bla+</i> | 43 | 27 | 1.59  | 4   | 66  | 0          | 70    | 0.02            |
| <i>bla-</i> | 42 | 27 | 1.56  | 2   | 67  | 0          | 69    | 0.01            |

9

10

Premature termination codons signaled frameshift repair

1 Table 4. Possible NMGE-relevant genes and pathways that were upregulated in the frameshift

| Pathway Term                    | Database | ID       | Input number | Background number | P-Value | Corrected P-Value |
|---------------------------------|----------|----------|--------------|-------------------|---------|-------------------|
| <i>ABC transporters</i>         | KEGG     | eco02010 | 32           | 171               | 0.0001  | 0.0090            |
| <i>RNA degradation</i>          | KEGG     | eco03018 | 1            | 15                | 0.7419  | 0.9762            |
| <i>DNA replication</i>          | KEGG     | eco03030 | 1            | 17                | 0.7822  | 0.9762            |
| <i>Mismatch repair</i>          | KEGG     | eco03430 | 1            | 22                | 0.8575  | 0.9796            |
| <i>Homologous recombination</i> | KEGG     | eco03440 | 1            | 27                | 0.9069  | 0.9796            |

2

3

4 Table 5. Possible NMGE-relevant genes and pathways that were upregulated in the revertant

| Pathway Term                    | Database | ID       | Input number | Background number | P-Value  | Corrected P-Value |
|---------------------------------|----------|----------|--------------|-------------------|----------|-------------------|
| <i>ABC transporters</i>         | KEGG     | eco02010 | 32           | 171               | 3.53E-05 | 0.0018            |
| <i>Homologous recombination</i> | KEGG     | eco03440 | 2            | 27                | 0.6539   | 0.9519            |
| <i>RNA degradation</i>          | KEGG     | eco03018 | 3            | 15                | 0.1017   | 0.5470            |
| <i>DNA replication</i>          | KEGG     | eco03030 | 1            | 17                | 0.7564   | 0.9519            |
| <i>Mismatch repair</i>          | KEGG     | eco03430 | 1            | 22                | 0.8357   | 0.9519            |

5

## 6 References

7 1. Seligmann, H. and D.D. Pollock, *The ambush hypothesis: hidden stop codons prevent*  
8 *off-frame gene reading*. DNA Cell Biol, 2004. **23**(10): p. 701-5.

9 2. Owens, M., et al., *SOS1 frameshift mutations cause pure mucosal neuroma syndrome,*  
10 *a clinical phenotype distinct from multiple endocrine neoplasia type 2B*. Clin Endocrinol (Oxf),  
11 2016. **84**(5): p. 715-9.

12 3. Yan, S.E., et al., *In-depth analysis of hyaline fibromatosis syndrome frameshift*  
13 *mutations at the same site reveal the necessity of personalized therapy*. Hum Mutat, 2013.  
14 **34**(7): p. 1005-17.

15 4. Amiel, J., et al., *Polyalanine expansion and frameshift mutations of the paired-like*  
16 *homeobox gene PHOX2B in congenital central hypoventilation syndrome*. Nat Genet, 2003.  
17 **33**(4): p. 459-61.

18 5. Kang, S., et al., *GLI3 frameshift mutations cause autosomal dominant Pallister-Hall*  
19 *syndrome*. Nat Genet, 1997. **15**(3): p. 266-8.

20 6. Ge, Z., et al., *Polypyrimidine tract binding protein 1 protects mRNAs from recognition*  
21 *by the nonsense-mediated mRNA decay pathway*. Elife, 2016. **5**.

- 1           7. Schweingruber, C., et al., *Nonsense-mediated mRNA decay - mechanisms of substrate*
- 2           *mRNA recognition and degradation in mammalian cells*. *Biochim Biophys Acta*, 2013.
- 3           **1829**(6-7): p. 612-23.
- 4           8. Niu, D.K. and J.L. Cao, *Nucleosome deposition and DNA methylation may participate in*
- 5           *the recognition of premature termination codon in nonsense-mediated mRNA decay*. *FEBS*
- 6           *Lett*, 2010. **584**(16): p. 3509-12.
- 7           9. Muhlemann, O., et al., *Recognition and elimination of nonsense mRNA*. *Biochim*
- 8           *Biophys Acta*, 2008. **1779**(9): p. 538-49.
- 9           10. Muhlemann, O., *Recognition of nonsense mRNA: towards a unified model*.
- 10           *Biochem Soc Trans*, 2008. **36**(Pt 3): p. 497-501.
- 11           11. Muhlrad, D. and R. Parker, *Recognition of yeast mRNAs as "nonsense containing"*
- 12           *leads to both inhibition of mRNA translation and mRNA degradation: implications for the*
- 13           *control of mRNA decapping*. *Mol Biol Cell*, 1999. **10**(11): p. 3971-8.
- 14           12. Zhang, J. and L.E. Maquat, *Evidence that the decay of nucleus-associated*
- 15           *nonsense mRNA for human triosephosphate isomerase involves nonsense codon recognition*
- 16           *after splicing*. *RNA*, 1996. **2**(3): p. 235-43.
- 17           13. Fujikura, K., *Premature termination codons in modern human genomes*. *Sci Rep*,
- 18           2016. **6**: p. 22468.
- 19           14. Wong, T.Y., et al., *Role of premature stop codons in bacterial evolution*. *J Bacteriol*,
- 20           2008. **190**(20): p. 6718-25.
- 21           15. Jensen, N.M., et al., *An update on targeted gene repair in mammalian cells:*
- 22           *methods and mechanisms*. *J Biomed Sci*, 2011. **18**: p. 10.
- 23           16. Streisinger, G., et al., *Frameshift mutations and the genetic code. This paper is*
- 24           *dedicated to Professor Theodosius Dobzhansky on the occasion of his 66th birthday*. *Cold*
- 25           *Spring Harb Symp Quant Biol*, 1966. **31**: p. 77-84.
- 26           17. Schaaper, R.M., *Mechanisms of mutagenesis in the Escherichia coli mutator*
- 27           *mutD5: role of DNA mismatch repair*. *Proc Natl Acad Sci U S A*, 1988. **85**(21): p. 8126-30.
- 28           18. Roberts, R.J., M.O. Carneiro, and M.C. Schatz, *The advantages of SMRT*
- 29           *sequencing*. *Genome Biol*, 2013. **14**(7): p. 405.
- 30           19. Kuraoka, I., *Diversity of Endonuclease V: From DNA Repair to RNA Editing*.
- 31           *Biomolecules*, 2015. **5**(4): p. 2194-206.
- 32           20. Hwang, J. and Y.K. Kim, *When a ribosome encounters a premature termination*
- 33           *codon*. *BMB Rep*, 2013. **46**(1): p. 9-16.
- 34           21. Le Hir, H., et al., *The exon-exon junction complex provides a binding platform for*
- 35           *factors involved in mRNA export and nonsense-mediated mRNA decay*. *EMBO J*, 2001. **20**(17):
- 36           p. 4987-97.
- 37           22. Gonzalez, C.I., W. Wang, and S.W. Peltz, *Nonsense-mediated mRNA decay in*
- 38           *Saccharomyces cerevisiae: a quality control mechanism that degrades transcripts harboring*
- 39           *premature termination codons*. *Cold Spring Harb Symp Quant Biol*, 2001. **66**: p. 321-8.
- 40           23. Zhang, J. and L.E. Maquat, *Evidence that translation reinitiation abrogates*
- 41           *nonsense-mediated mRNA decay in mammalian cells*. *EMBO J*, 1997. **16**(4): p. 826-33.
- 42           24. Scofield, D.G., X. Hong, and M. Lynch, *Position of the final intron in full-length*
- 43           *transcripts: determined by NMD?* *Mol Biol Evol*, 2007. **24**(4): p. 896-9.



- 1           25. Richards, J., et al., *Quality control of bacterial mRNA decoding and decay*. Biochim  
2 Biophys Acta, 2008. **1779**(9): p. 574-82.
- 3           26. He, F., A.H. Brown, and A. Jacobson, *Upf1p, Nmd2p, and Upf3p are interacting*  
4 *components of the yeast nonsense-mediated mRNA decay pathway*. Mol Cell Biol, 1997. **17**(3):  
5 p. 1580-94.
- 6           27. Leeds, P., et al., *The product of the yeast UPF1 gene is required for rapid turnover*  
7 *of mRNAs containing a premature translational termination codon*. Genes Dev, 1991. **5**(12A):  
8 p. 2303-14.
- 9           28. Kugita, M., et al., *RNA editing in hornwort chloroplasts makes more than half the*  
10 *genes functional*. Nucleic Acids Res, 2003. **31**(9): p. 2417-23.
- 11          29. Bock, R., *Sense from nonsense: how the genetic information of chloroplasts is*  
12 *altered by RNA editing*. Biochimie, 2000. **82**(6-7): p. 549-57.
- 13          30. Horvath, A., E.A. Berry, and D.A. Maslov, *Translation of the edited mRNA for*  
14 *cytochrome b in trypanosome mitochondria*. Science, 2000. **287**(5458): p. 1639-40.
- 15          31. Yoshinaga, K., et al., *Extensive RNA editing and possible double-stranded*  
16 *structures determining editing sites in the atpB transcripts of hornwort chloroplasts*. Nucleic  
17 Acids Res, 1997. **25**(23): p. 4830-4.
- 18          32. Sloof, P., et al., *RNA editing in mitochondria of cultured trypanosomatids:*  
19 *translatable mRNAs for NADH-dehydrogenase subunits are missing*. J Bioenerg Biomembr,  
20 1994. **26**(2): p. 193-203.
- 21          33. Simpson, L., S. Sbicigo, and R. Aphasizhev, *Uridine insertion/deletion RNA editing*  
22 *in trypanosome mitochondria: a complex business*. Rna, 2003. **9**(3): p. 265-76.
- 23          34. Alfonzo, J.D., O. Thiemann, and L. Simpson, *The mechanism of U*  
24 *insertion/deletion RNA editing in kinetoplastid mitochondria*. Nucleic Acids Res, 1997. **25**(19):  
25 p. 3751-9.
- 26          35. Zougman, A., et al., *Evidence for insertional RNA editing in humans*. Curr Biol,  
27 2008. **18**(22): p. 1760-5.
- 28          36. Chester, A., et al., *The apolipoprotein B mRNA editing complex performs a*  
29 *multifunctional cycle and suppresses nonsense-mediated decay*. EMBO J, 2003. **22**(15): p.  
30 3971-82.
- 31          37. Kopelowitz, J., et al., *Influence of codon context on UGA suppression and*  
32 *readthrough*. J Mol Biol, 1992. **225**(2): p. 261-9.
- 33          38. Weiss, R.B., *Ribosomal frameshifting, jumping and readthrough*. Curr Opin Cell  
34 Biol, 1991. **3**(6): p. 1051-5.
- 35          39. Engelberg-Kulka, H., L. Dekel, and M. Israeli-Reches, *Regulation of the escherichia*  
36 *coli tryptophan operon by readthrough of UGA termination codons*. Biochem Biophys Res  
37 Commun, 1981. **98**(4): p. 1008-15.
- 38          40. Seidman, J.S., B.D. Janssen, and C.S. Hayes, *Alternative fates of paused ribosomes*  
39 *during translation termination*. J Biol Chem, 2011. **286**(36): p. 31105-12.
- 40          41. Su, D., Y. Li, and V.N. Gladyshev, *Selenocysteine insertion directed by the 3'-UTR*  
41 *SECIS element in Escherichia coli*. Nucleic Acids Res, 2005. **33**(8): p. 2486-92.
- 42          42. Claisse, M.L., M. Boguta, and W. Zagorski, *Translational readthrough of a*  
43 *termination codon in the yeast mitochondrial mRNA VAR1 as a result of mutation in the*  
44 *release factor mRF1*. Acta Biochim Pol, 2005. **52**(1): p. 129-37.

- 1           43. Halvey, P.J., D.C. Liebler, and R.J. Slebos, *A Reporter System for Translational*
- 2           *Readthrough of Stop Codons in Human Cells*. FEBS Open Bio, 2012. **2**: p. 56-59.
- 3           44. Eswarappa, S.M., et al., *Programmed translational readthrough generates*
- 4           *antiangiogenic VEGF-Ax*. Cell, 2014. **157**(7): p. 1605-18.
- 5           45. Staff, P.G., *Correction: Functional Translational Readthrough: A Systems Biology*
- 6           *Perspective*. PLoS Genet, 2016. **12**(11): p. e1006434.
- 7           46. Fox, T.D., *Five TGA "stop" codons occur within the translated sequence of the*
- 8           *yeast mitochondrial gene for cytochrome c oxidase subunit II*. Proc Natl Acad Sci U S A, 1979.
- 9           **76**(12): p. 6534-8.
- 10          47. Pai, H.V., et al., *A frameshift mutation and alternate splicing in human brain*
- 11          *generate a functional form of the pseudogene cytochrome P4502D7 that demethylates*
- 12          *codeine to morphine*. Journal of Biological Chemistry, 2004. **279**(26): p. 27383-27389.
- 13          48. Xu, J., R.W. Hendrix, and R.L. Duda, *Conserved translational frameshift in dsDNA*
- 14          *bacteriophage tail assembly genes*. Molecular Cell, 2004. **16**(1): p. 11-21.
- 15          49. Baykal, U., A.L. Moyne, and S. Tuzun, *A frameshift in the coding region of a novel*
- 16          *tomato class I basic chitinase gene makes it a pseudogene with a functional*
- 17          *wound-responsive promoter*. Gene, 2006. **376**(1): p. 37-46.
- 18          50. Chen, J., et al., *Dynamic pathways of -1 translational frameshifting*. Nature, 2014.
- 19          **512**(7514): p. 328-32.
- 20          51. Gaudin, C., et al., *Structure of the RNA signal essential for translational*
- 21          *frameshifting in HIV-1*. J Mol Biol, 2005. **349**(5): p. 1024-35.
- 22          52. Bekaert, M., et al., *Identification of programmed translational -1 frameshifting*
- 23          *sites in the genome of Saccharomyces cerevisiae*. Genome Res, 2005. **15**(10): p. 1411-20.
- 24          53. Licznar, P., et al., *Programmed translational -1 frameshifting on hexanucleotide*
- 25          *motifs and the wobble properties of tRNAs*. EMBO J, 2003. **22**(18): p. 4770-8.
- 26          54. Klobutcher, L.A. and P.J. Farabaugh, *Shifty ciliates: frequent programmed*
- 27          *translational frameshifting in euplotids*. Cell, 2002. **111**(6): p. 763-6.
- 28          55. Leeds, P., et al., *Gene products that promote mRNA turnover in Saccharomyces*
- 29          *cerevisiae*. Mol Cell Biol, 1992. **12**(5): p. 2165-77.
- 30          56. Kashima, I., et al., *Binding of a novel SMG-1-Upf1-eRF1-eRF3 complex (SURF) to*
- 31          *the exon junction complex triggers Upf1 phosphorylation and nonsense-mediated mRNA*
- 32          *decay*. Genes Dev, 2006. **20**(3): p. 355-67.
- 33          57. Keeling, K.M., et al., *Leaky termination at premature stop codons antagonizes*
- 34          *nonsense-mediated mRNA decay in S. cerevisiae*. RNA, 2004. **10**(4): p. 691-703.
- 35          58. Wang, X.W., X.; Chen, G.; Zhang, J.; Liu, Y.; Yang C. , *The shiftability of protein*
- 36          *coding genes: the genetic code was optimized for frameshift tolerating*. PeerJ PrePrints 2015.
- 37          **3** p. e806v1.
- 38          59. de Semir, D. and J.M. Aran, *Targeted gene repair: the ups and downs of a*
- 39          *promising gene therapy approach*. Curr Gene Ther, 2006. **6**(4): p. 481-504.
- 40          60. Parekh-Olmedo, H., et al., *Gene therapy progress and prospects: targeted gene*
- 41          *repair*. Gene Ther, 2005. **12**(8): p. 639-46.
- 42          61. Dekker, M., C. Brouwers, and H. te Riele, *Targeted gene modification in*
- 43          *mismatch-repair-deficient embryonic stem cells by single-stranded DNA oligonucleotides*.
- 44          Nucleic Acids Res, 2003. **31**(6): p. e27.

- 1           62. Trott, D.A. and A.C. Porter, *Hypothesis: transcript-templated repair of DNA*  
2           *double-strand breaks*. Bioessays, 2006. **28**(1): p. 78-83.
- 3           63. Keskin, H., C. Meers, and F. Storici, *Transcript RNA supports precise repair of its*  
4           *own DNA gene*. RNA Biol, 2016. **13**(2): p. 157-65.
- 5           64. Keskin, H., et al., *Transcript-RNA-templated DNA recombination and repair*.  
6           Nature, 2014. **515**(7527): p. 436-9.
- 7           65. Wei, L., et al., *DNA damage during the G0/G1 phase triggers RNA-templated,*  
8           *Cockayne syndrome B-dependent homologous recombination*. Proc Natl Acad Sci U S A, 2015.  
9           **112**(27): p. E3495-504.
- 10          66. Storici, F., *RNA-mediated DNA modifications and RNA-templated DNA repair*. Curr  
11          Opin Mol Ther, 2008. **10**(3): p. 224-30.
- 12          67. Storici, F., et al., *RNA-templated DNA repair*. Nature, 2007. **447**(7142): p. 338-41.
- 13          68. Liu, L., et al., *Strand bias in targeted gene repair is influenced by transcriptional*  
14          *activity*. Mol Cell Biol, 2002. **22**(11): p. 3852-63.
- 15          69. Isken, O. and L.E. Maquat, *Quality control of eukaryotic mRNA: safeguarding cells*  
16          *from abnormal mRNA function*. Genes Dev, 2007. **21**(15): p. 1833-56.
- 17          70. Vohhodina, J., D.P. Harkin, and K.I. Savage, *Dual roles of DNA repair enzymes in*  
18          *RNA biology/post-transcriptional control*. Wiley Interdiscip Rev RNA, 2016.
- 19          71. Yu, W. and W. Schuster, *Evidence for a site-specific cytidine deamination reaction*  
20          *involved in C to U RNA editing of plant mitochondria*. J Biol Chem, 1995. **270**(31): p. 18227-33.
- 21          72. Blanc, V., S. Litvak, and A. Araya, *RNA editing in wheat mitochondria proceeds by*  
22          *a deamination mechanism*. FEBS Lett, 1995. **373**(1): p. 56-60.
- 23          73. Gerber, A.P. and W. Keller, *RNA editing by base deamination: more enzymes, more*  
24          *targets, new mysteries*. Trends Biochem Sci, 2001. **26**(6): p. 376-84.
- 25          74. Young, S.G., *Recent progress in understanding apolipoprotein B*. Circulation, 1990.  
26          **82**(5): p. 1574-94.
- 27          75. Anant, S. and N.O. Davidson, *Hydrolytic nucleoside and nucleotide deamination,*  
28          *and genetic instability: a possible link between RNA-editing enzymes and cancer?* Trends Mol  
29          Med, 2003. **9**(4): p. 147-52.
- 30          76. Yeo, J., et al., *RNA editing changes the lesion specificity for the DNA repair enzyme*  
31          *NEIL1*. Proc Natl Acad Sci U S A, 2010. **107**(48): p. 20715-9.
- 32          77. Komor, A.C., et al., *Programmable editing of a target base in genomic DNA*  
33          *without double-stranded DNA cleavage*. Nature, 2016. **533**(7603): p. 420-4.
- 34          78. Nakielny, S. and G. Dreyfuss, *Transport of proteins and RNAs in and out of the*  
35          *nucleus*. Cell, 1999. **99**(7): p. 677-90.
- 36          79. Thaler, D.S., G. Tomblin, and K. Zahn, *Short-patch reverse transcription in*  
37          *Escherichia coli*. Genetics, 1995. **140**(3): p. 909-15.
- 38          80. Shen, Y., et al., *RNA-driven genetic changes in bacteria and in human cells*. Mutat  
39          Res, 2011. **717**(1-2): p. 91-8.
- 40          81. Shalem, O., et al., *Genome-scale CRISPR-Cas9 knockout screening in human cells*.  
41          Science, 2014. **343**(6166): p. 84-7.
- 42          82. Ran, F.A., et al., *Genome engineering using the CRISPR-Cas9 system*. Nat Protoc,  
43          2013. **8**(11): p. 2281-308.

---

Premature termination codons signaled frameshift repair

---

- 1           83.    Ran, F.A., et al., *Double nicking by RNA-guided CRISPR Cas9 for enhanced genome*
- 2           *editing specificity*. Cell, 2013. **154**(6): p. 1380-9.
- 3           84.    Paquet, D., et al., *Efficient introduction of specific homozygous and heterozygous*
- 4           *mutations using CRISPR/Cas9*. Nature, 2016. **533**(7601): p. 125-9.
- 5           85.    Zimmer, C.T., et al., *A CRISPR/Cas9 mediated point mutation in the alpha 6*
- 6           *subunit of the nicotinic acetylcholine receptor confers resistance to spinosad in Drosophila*
- 7           *melanogaster*. Insect Biochem Mol Biol, 2016. **73**: p. 62-9.
- 8

**Fig 1.** The frameshift mutagenesis of the *bla* gene in the plasmid pBR322

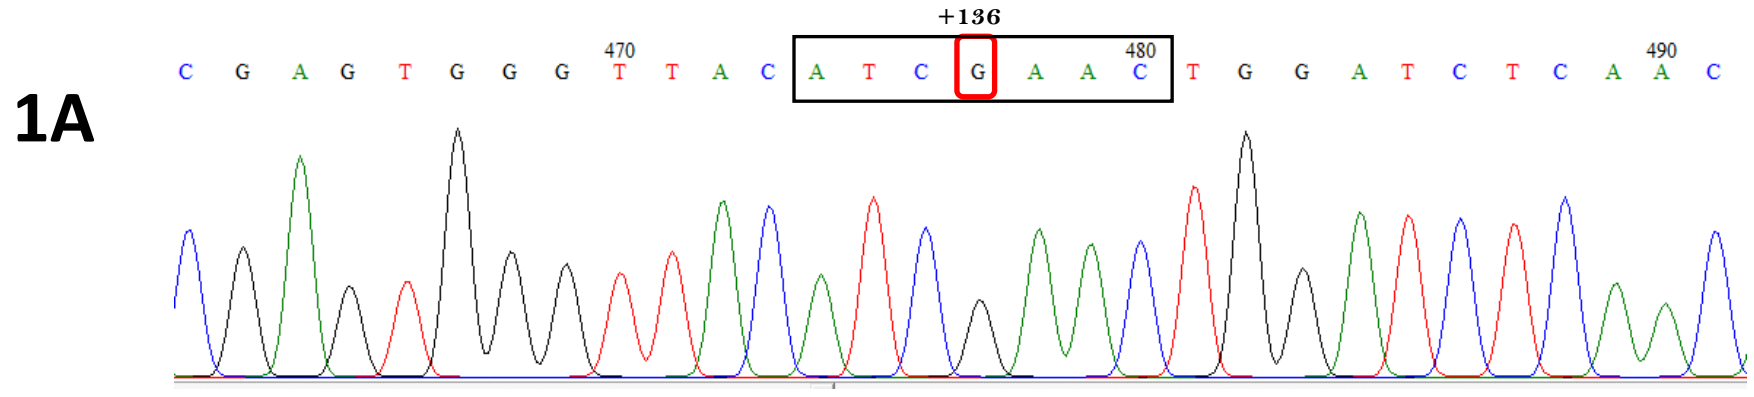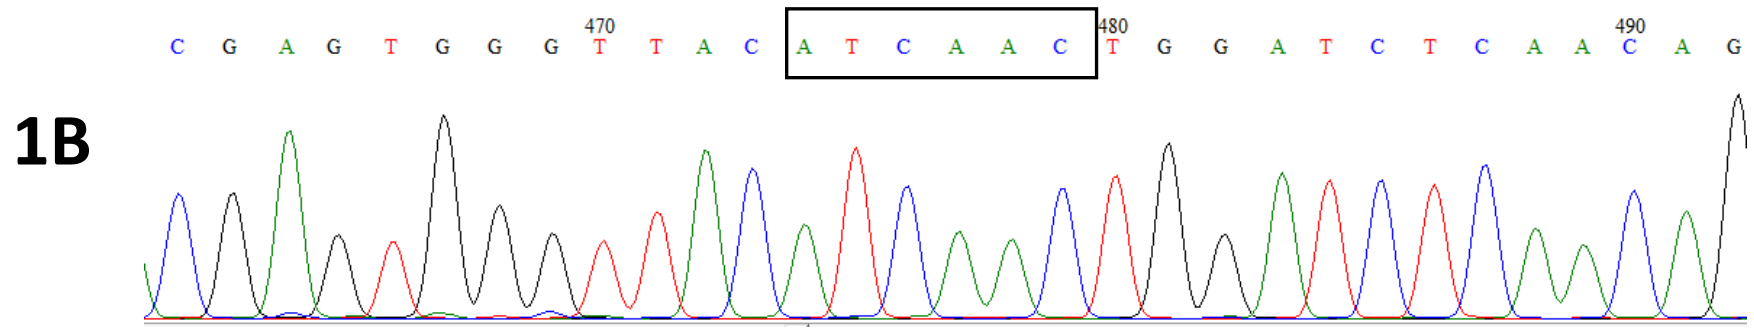

**1C**

|                                   |      |   |   |                         |   |   |      |
|-----------------------------------|------|---|---|-------------------------|---|---|------|
| <b>Wild-type (<i>bla</i> +):</b>  | ...A | T | C | <sup>136</sup> <b>G</b> | A | A | C... |
|                                   |      |   |   |                         |   |   |      |
| <b>Frameshift (<i>bla</i> -):</b> | ...A | T | C | -                       | A | A | C... |

**Fig 2.** Growth of different *E.coli* strains on ACPs and TCPs

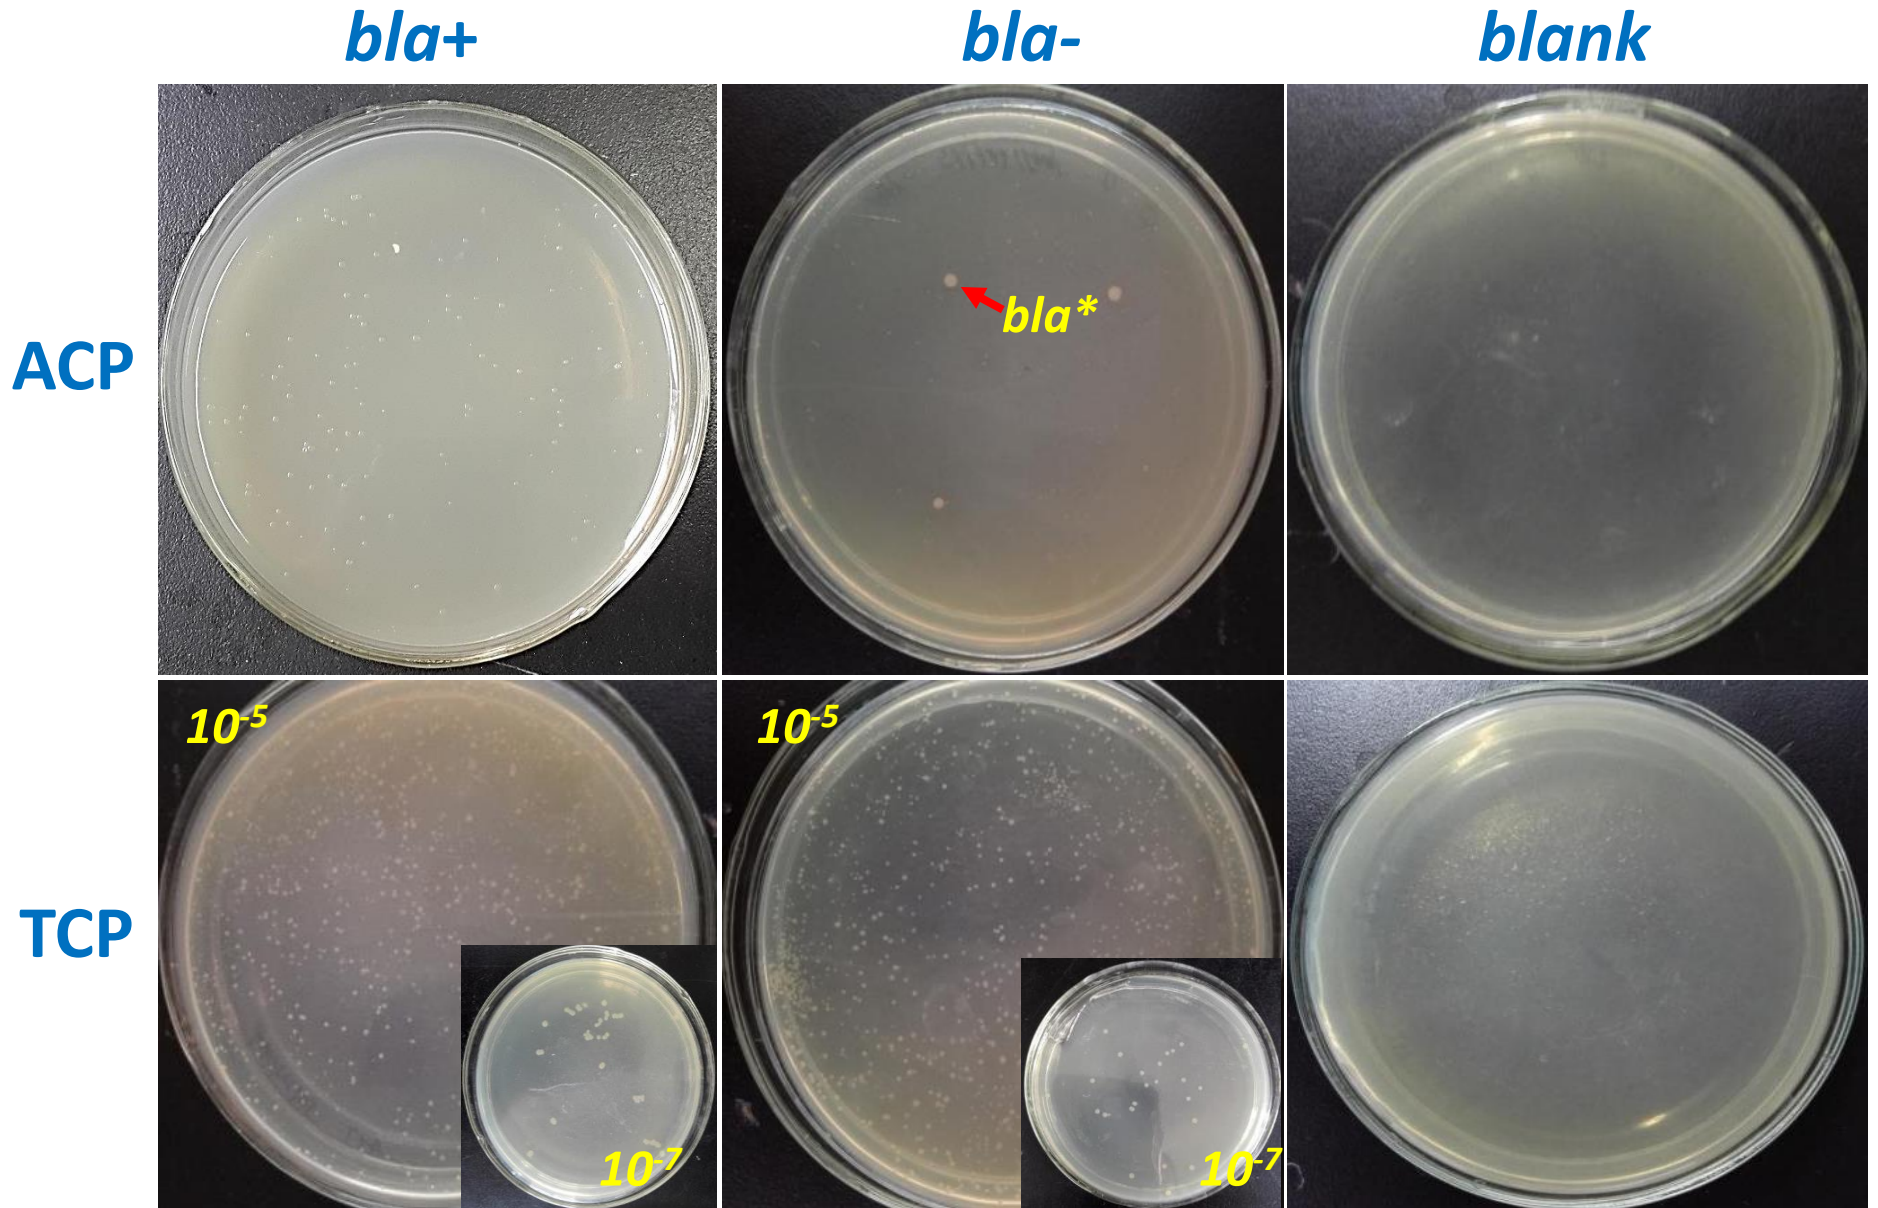

# Fig 3A *Random mutagenesis*

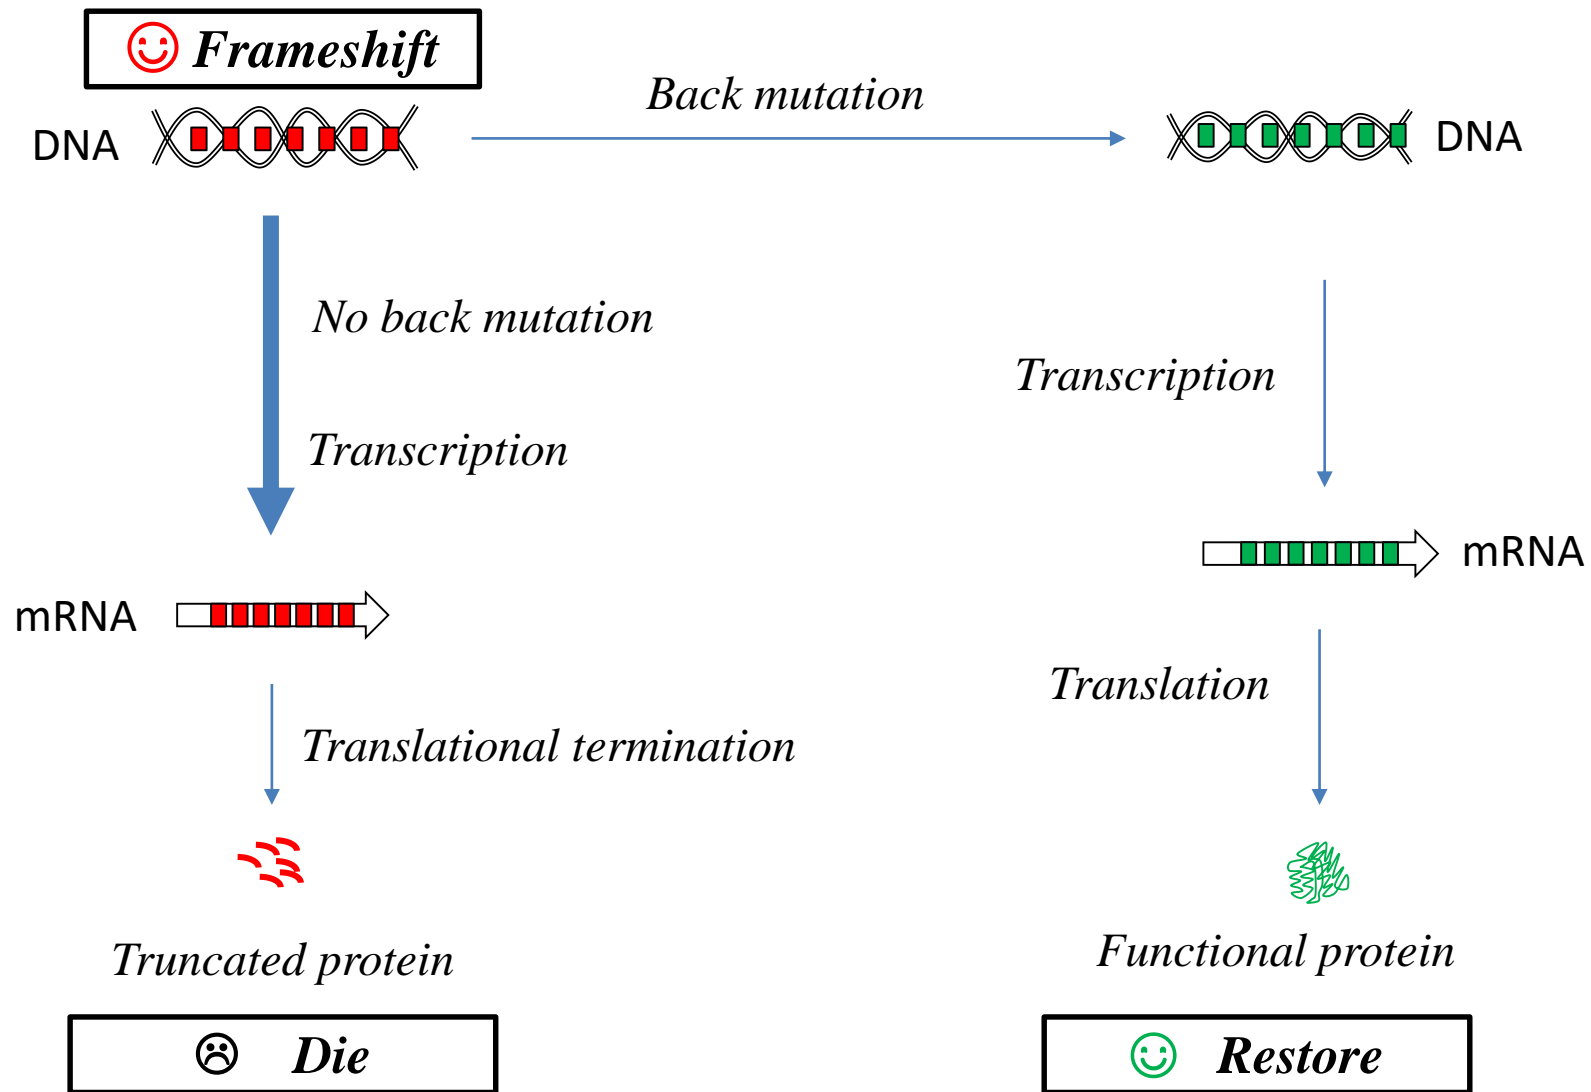

**Fig 3B** *Active repair (NMGE)*

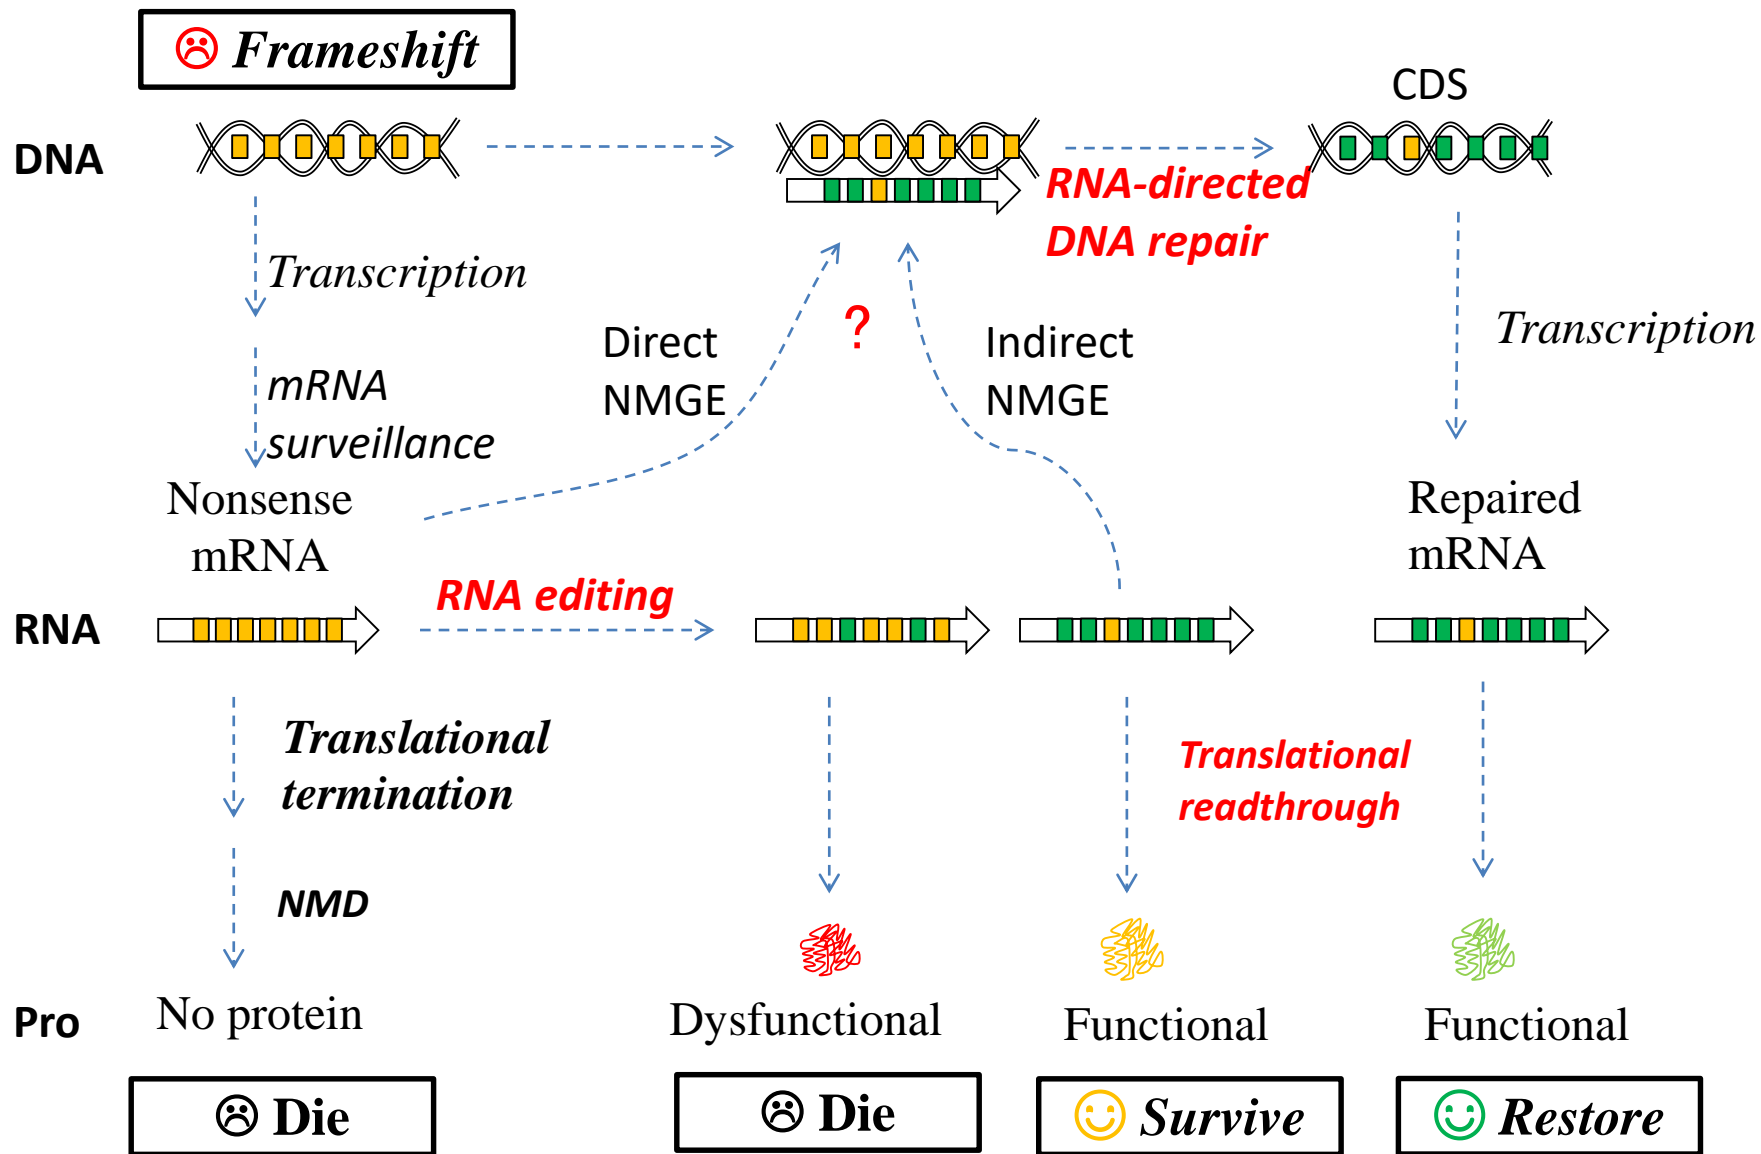



**Fig 4A.** Sanger diagram of the spontaneous revertants and subcultures

**Initial revertants  
(grow Slowly)**

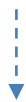

**Later subculture  
(grow faster)**

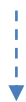

**Final subculture  
(grow fast)**

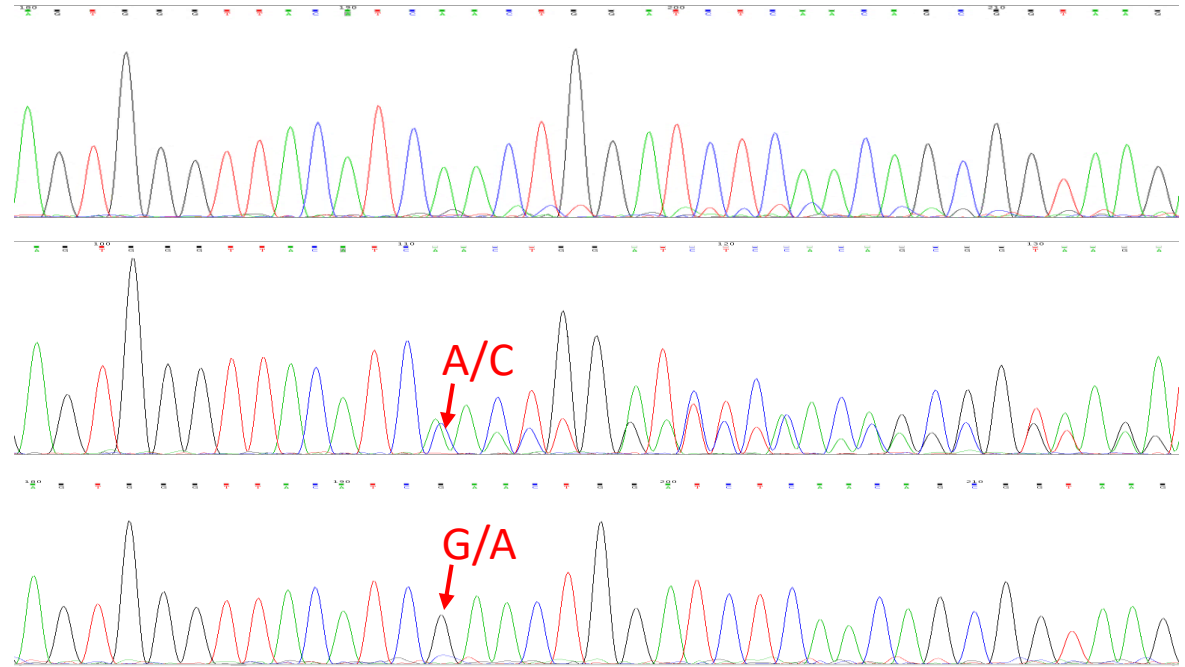

|             |   |   |   |   |   |   |   |   |   |   |   |   |   |   |   |   |   |   |   |   |   |   |   |   |   |   |   |   |   |   |   |   |   |   |   |   |   |  |
|-------------|---|---|---|---|---|---|---|---|---|---|---|---|---|---|---|---|---|---|---|---|---|---|---|---|---|---|---|---|---|---|---|---|---|---|---|---|---|--|
| Wild-type:  | A | G | T | G | G | G | T | T | A | C | A | T | C | G | A | A | C | T | G | G | A | T | C | T | C | A | A | C | A | G | C | G | G | T | A | A | G |  |
|             |   |   |   |   |   |   |   |   |   |   |   |   |   | - |   |   |   |   |   |   |   |   |   |   |   |   |   |   |   |   |   |   |   |   |   |   |   |  |
| Frameshift: | A | G | T | G | G | G | T | T | A | C | A | T | C | - | A | A | C | T | G | G | A | T | C | T | C | A | A | C | A | G | C | G | G | T | A | A | G |  |
|             |   |   |   |   |   |   |   |   |   |   |   |   |   | - |   |   |   |   |   |   |   |   |   |   |   |   |   |   |   |   |   |   |   |   |   |   |   |  |
| Revertants: | A | G | T | G | G | G | T | T | A | C | A | T | C | N | A | A | C | T | G | G | A | T | C | T | C | A | A | A | A | G | C | G | G | T | A | A | G |  |

**Fig 4B.** The *bla* sequences of the wild-type and revertants

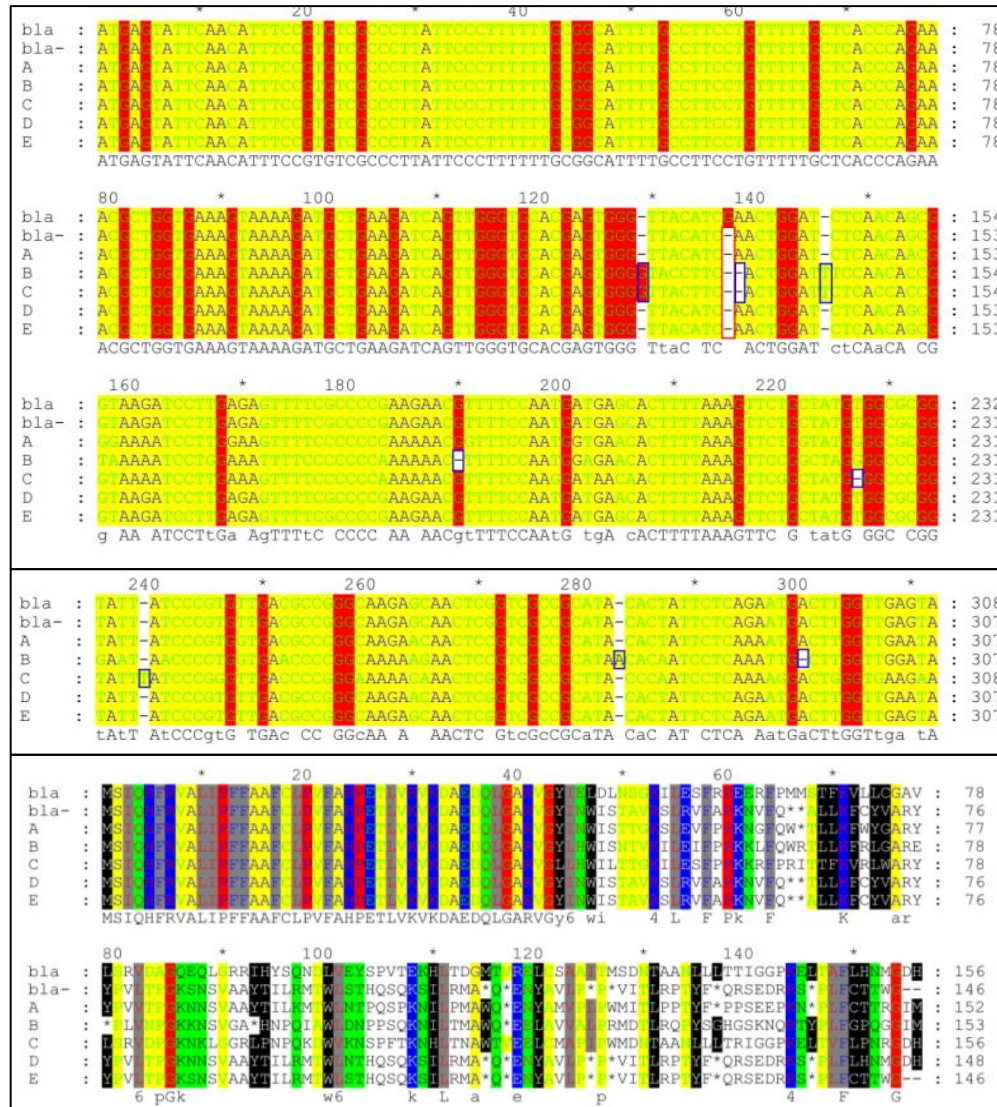

**Fig 4C.** The SNP/InDel in the genome of the wild-type and revertants

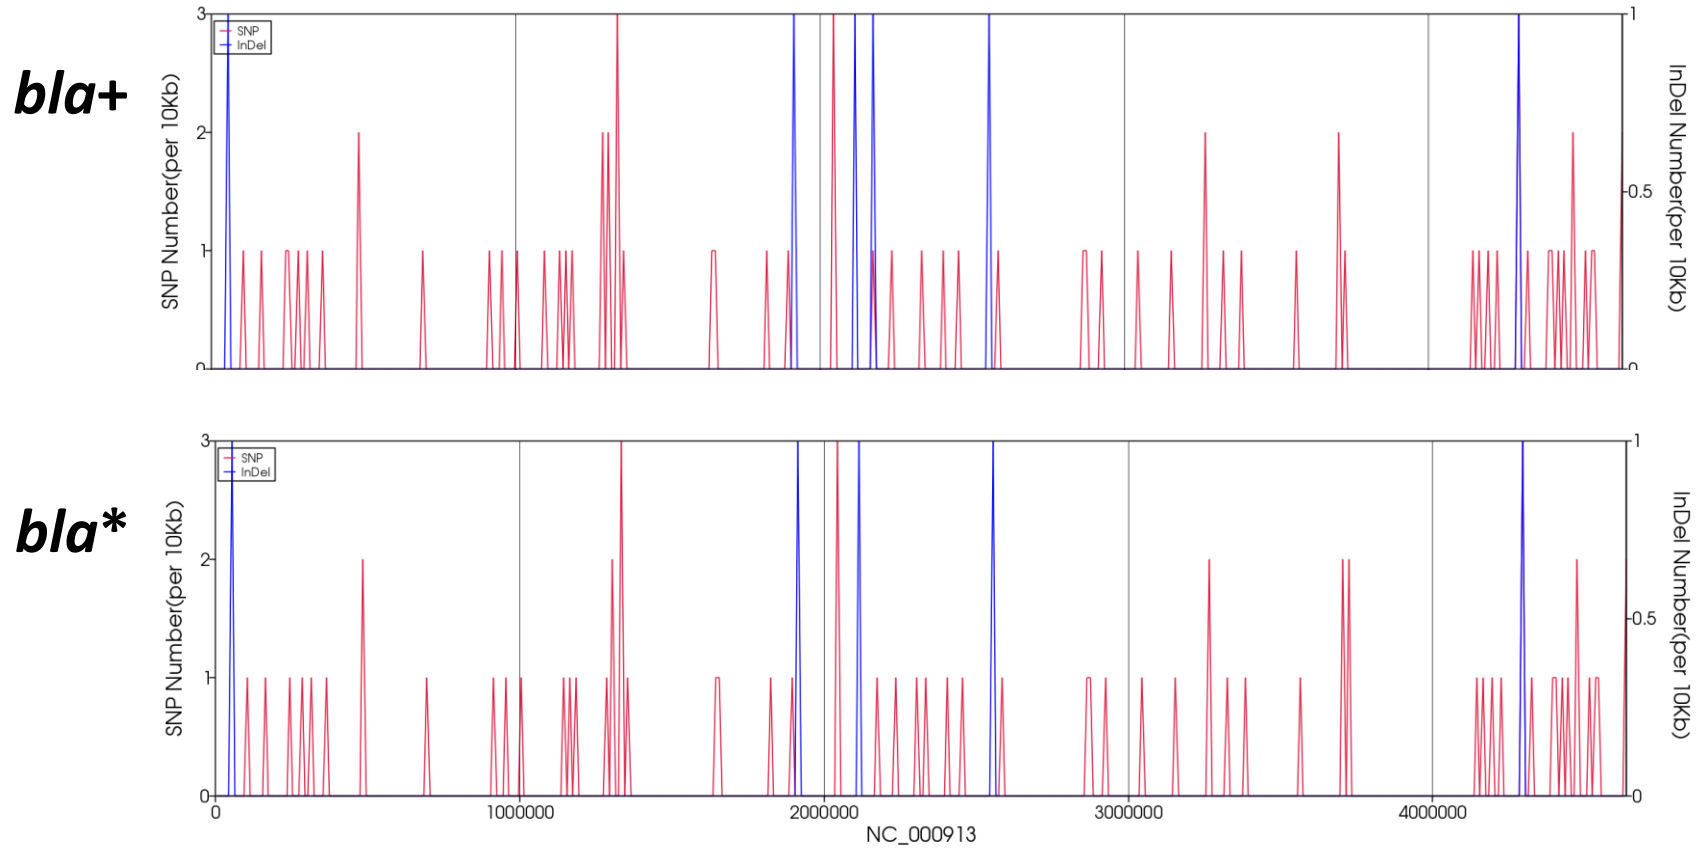

**Fig 4D.** The SNP/InDel in the genome of the wild-type and revertants

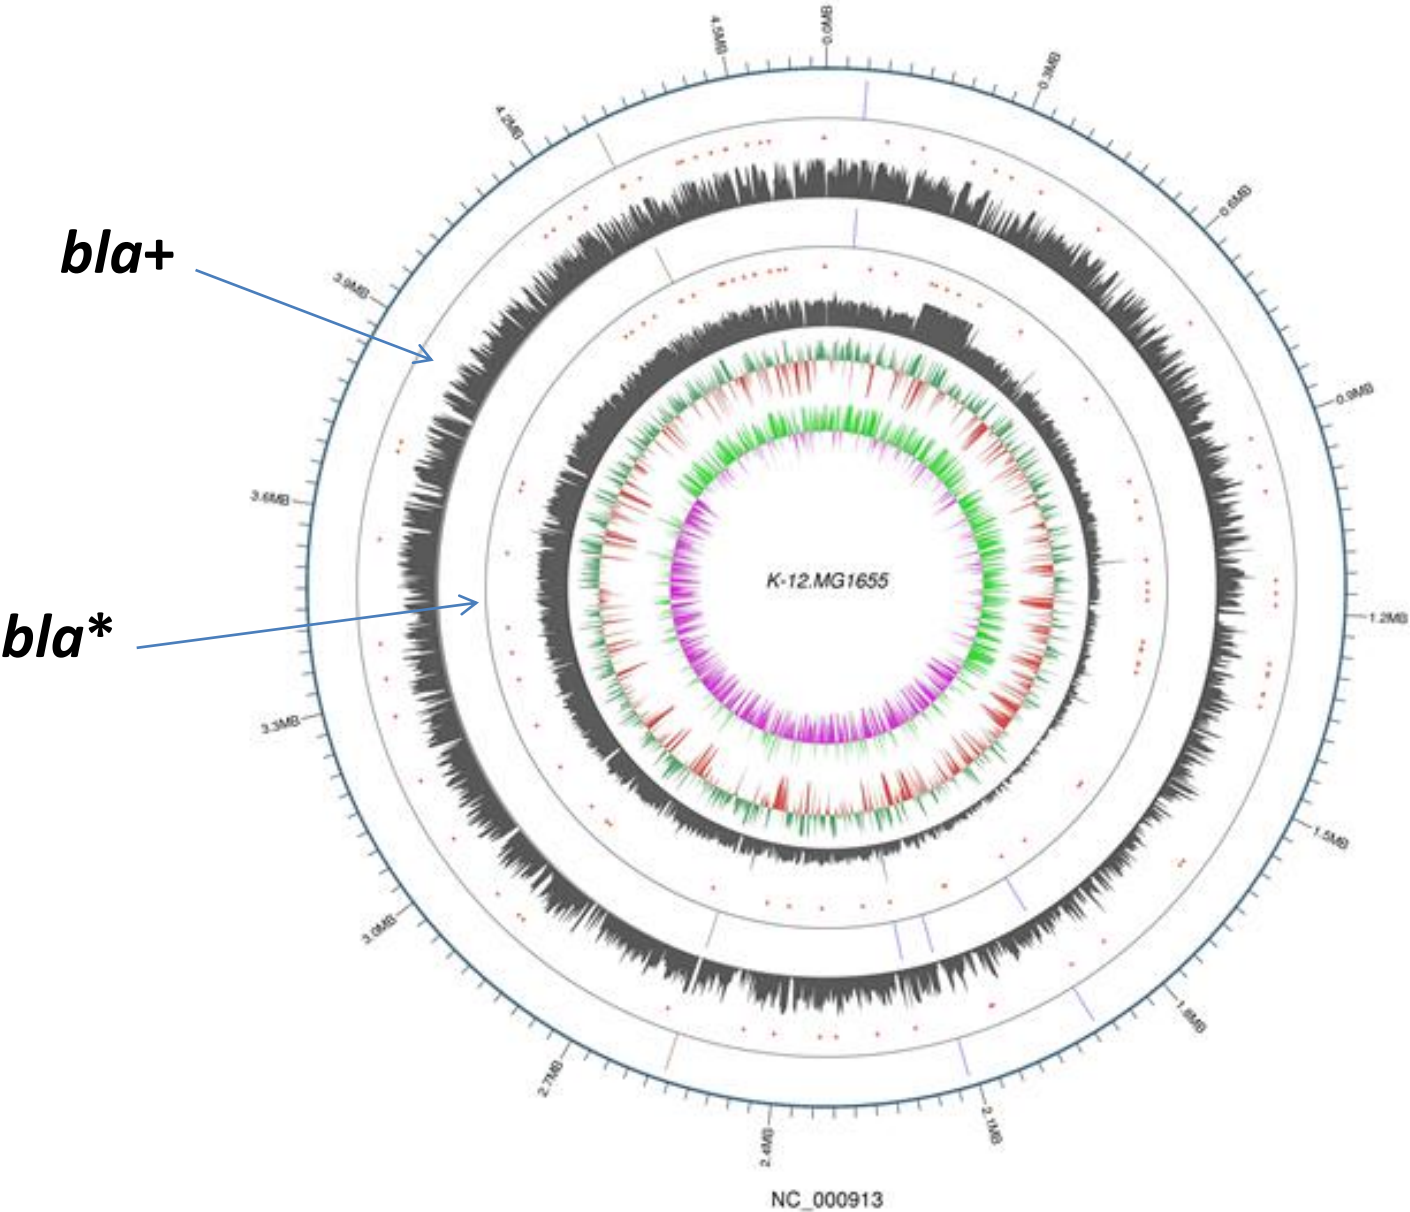

**Fig 4E.** The structure variation (SV) in the genome of wild-type and revertants

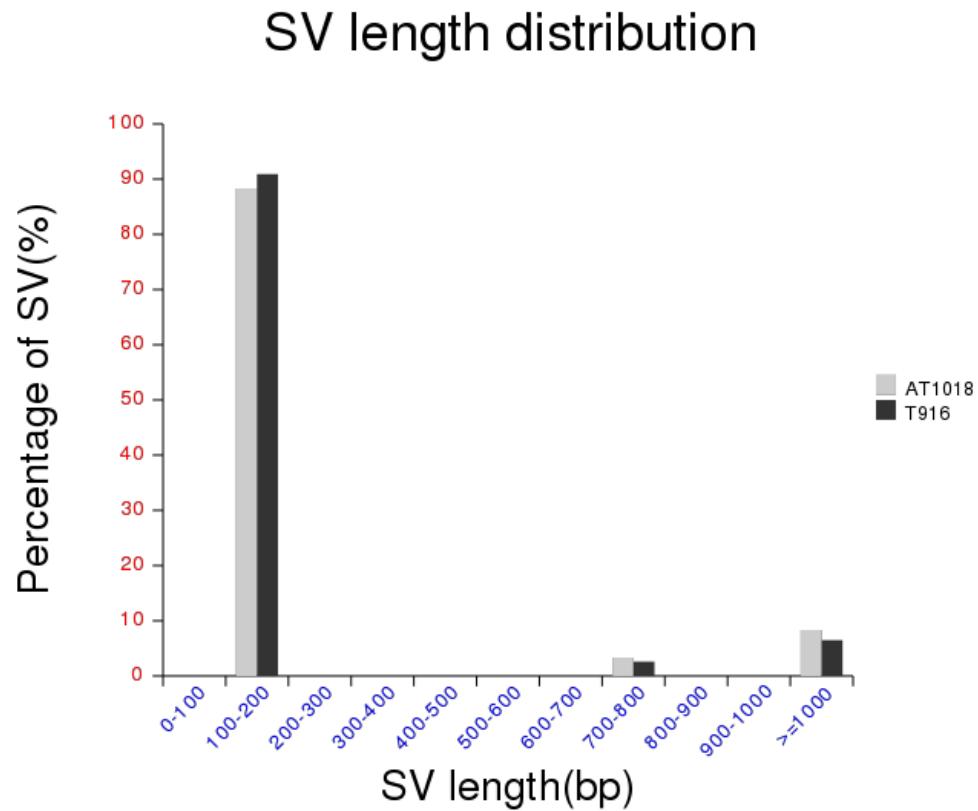

**Fig 5.** *The expression of the PTC-free frameshifted bla (bla#)*

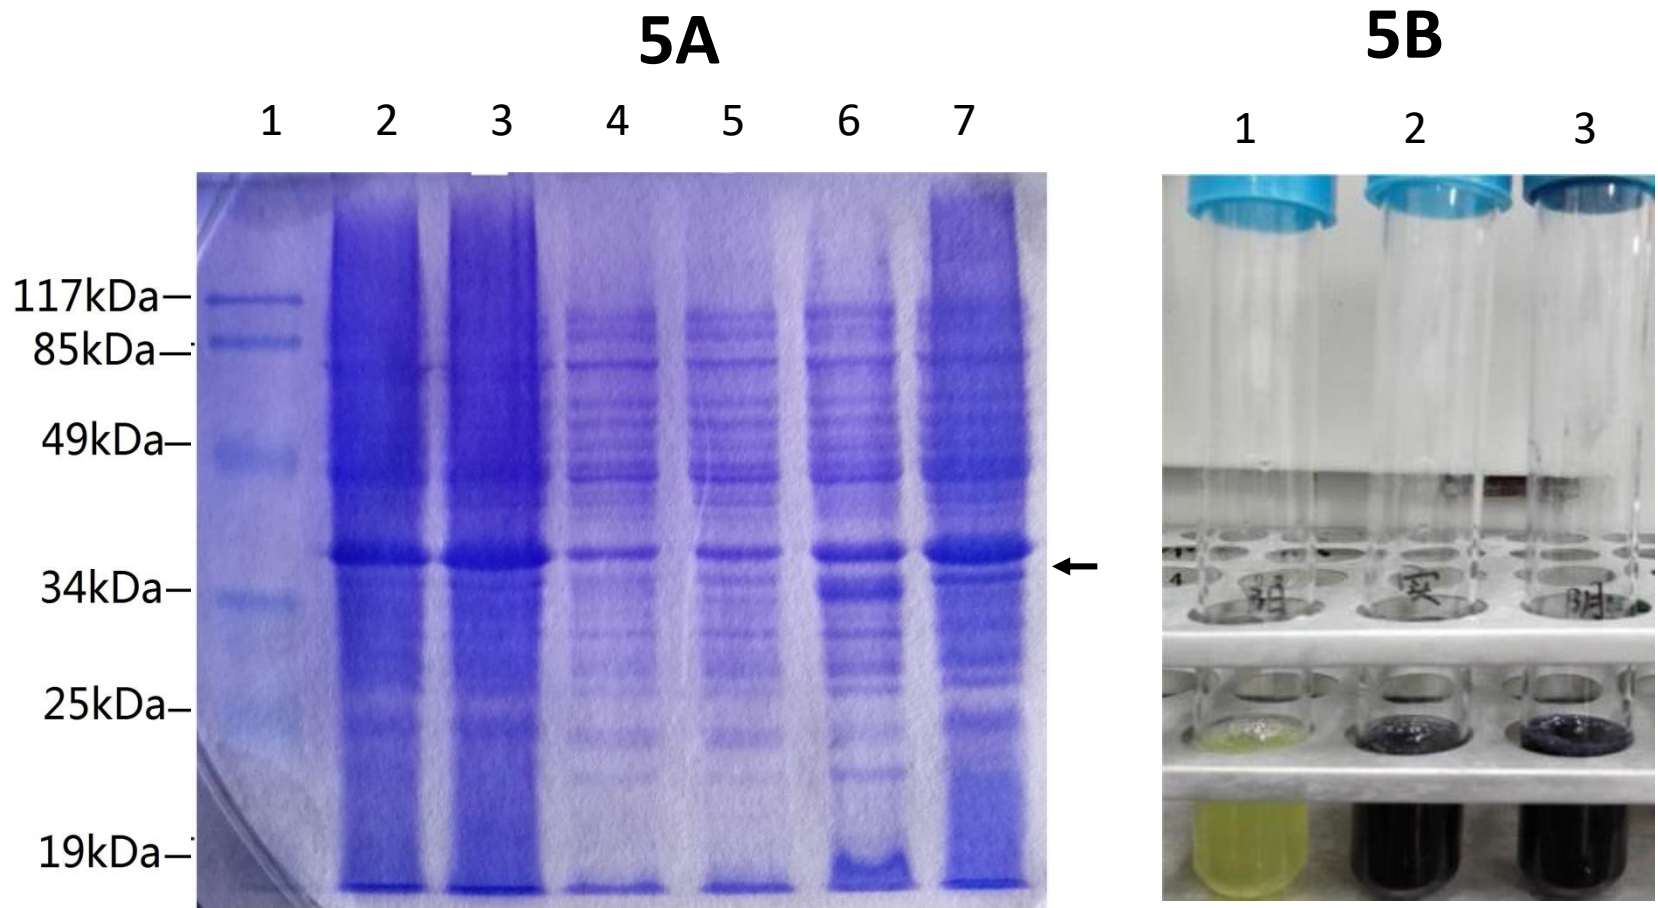

# Fig 6. Transcriptome Analysis

## 6A Numbers of differential expression genes (DGE)

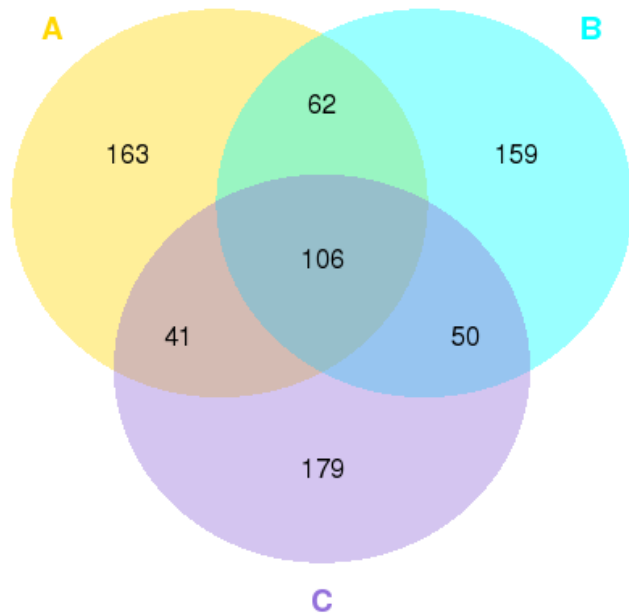

A: FS\_2vsW\_1  
B: R\_3vsW\_1  
C: RE\_4vsW\_1

Cluster analysis of differentially expressed genes

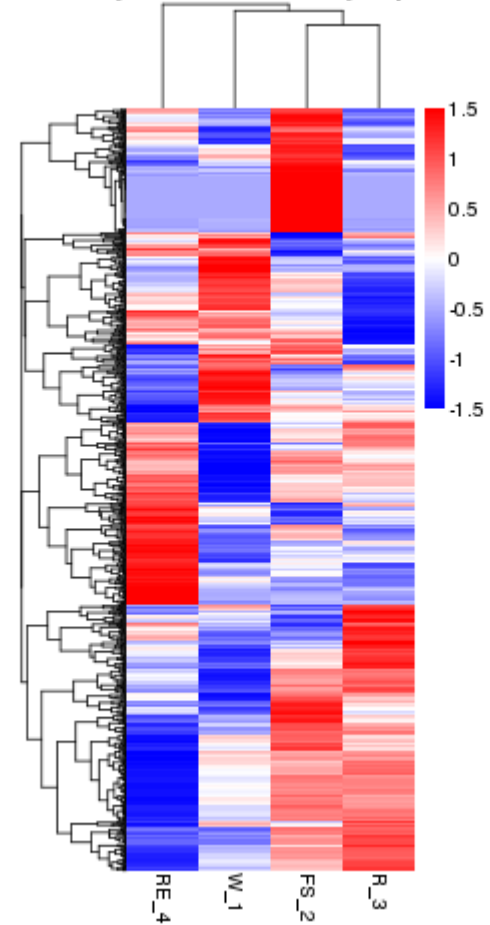

# 6B

The Most Enriched GO Terms (FS\_2vsW\_1)

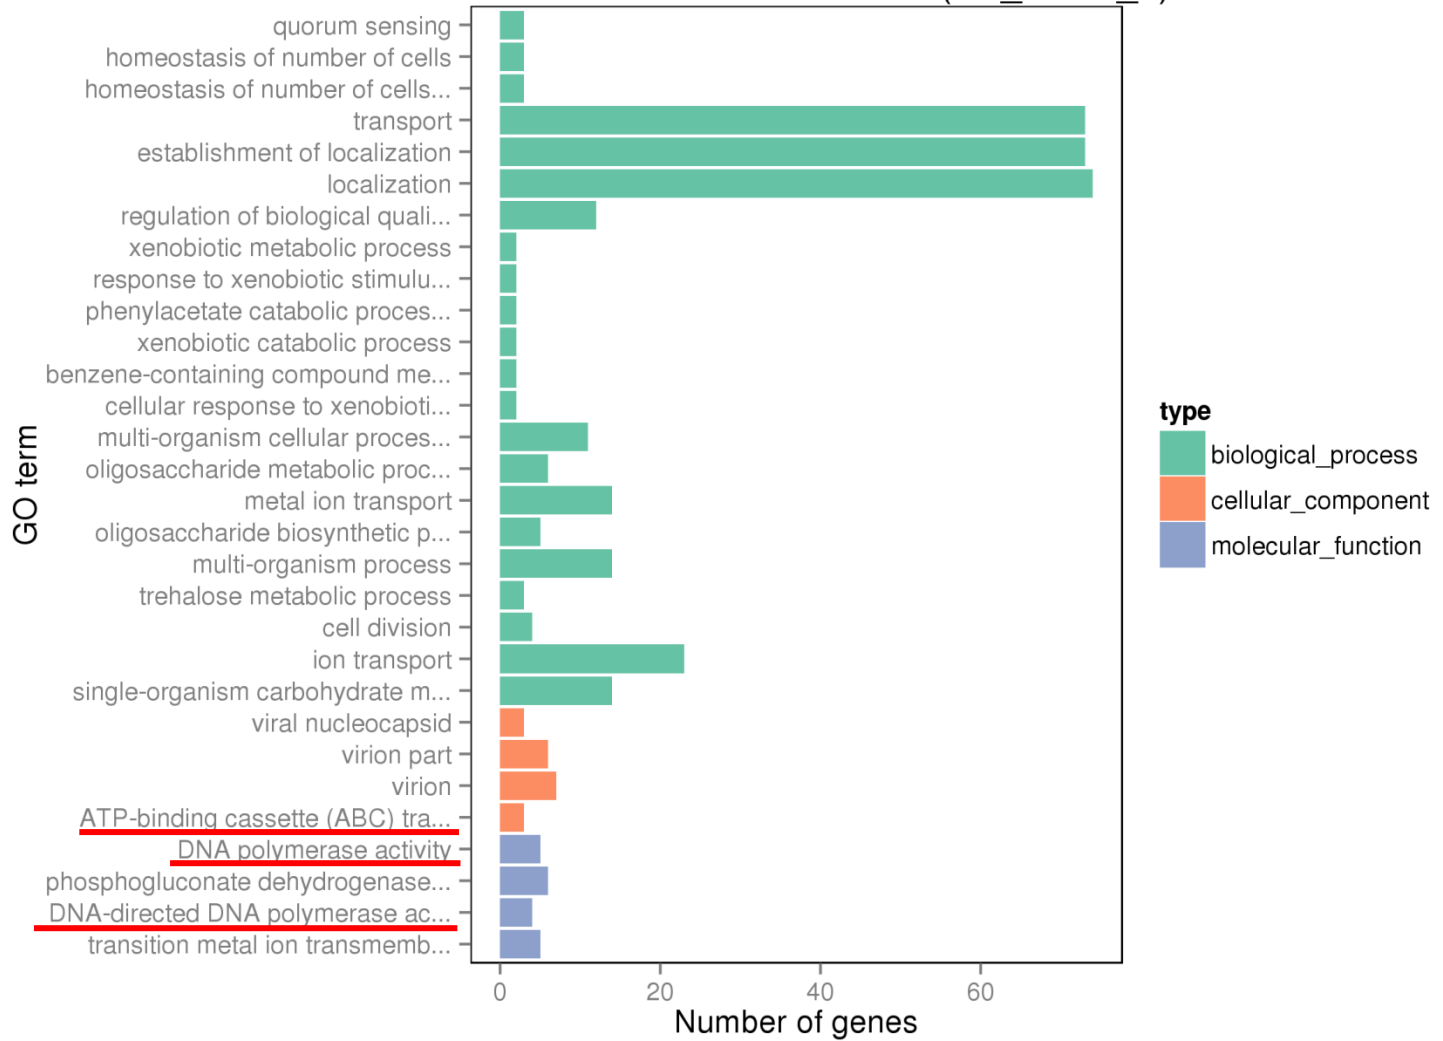



# 6C

The Most Enriched GO Terms (R\_3vsFS\_2)

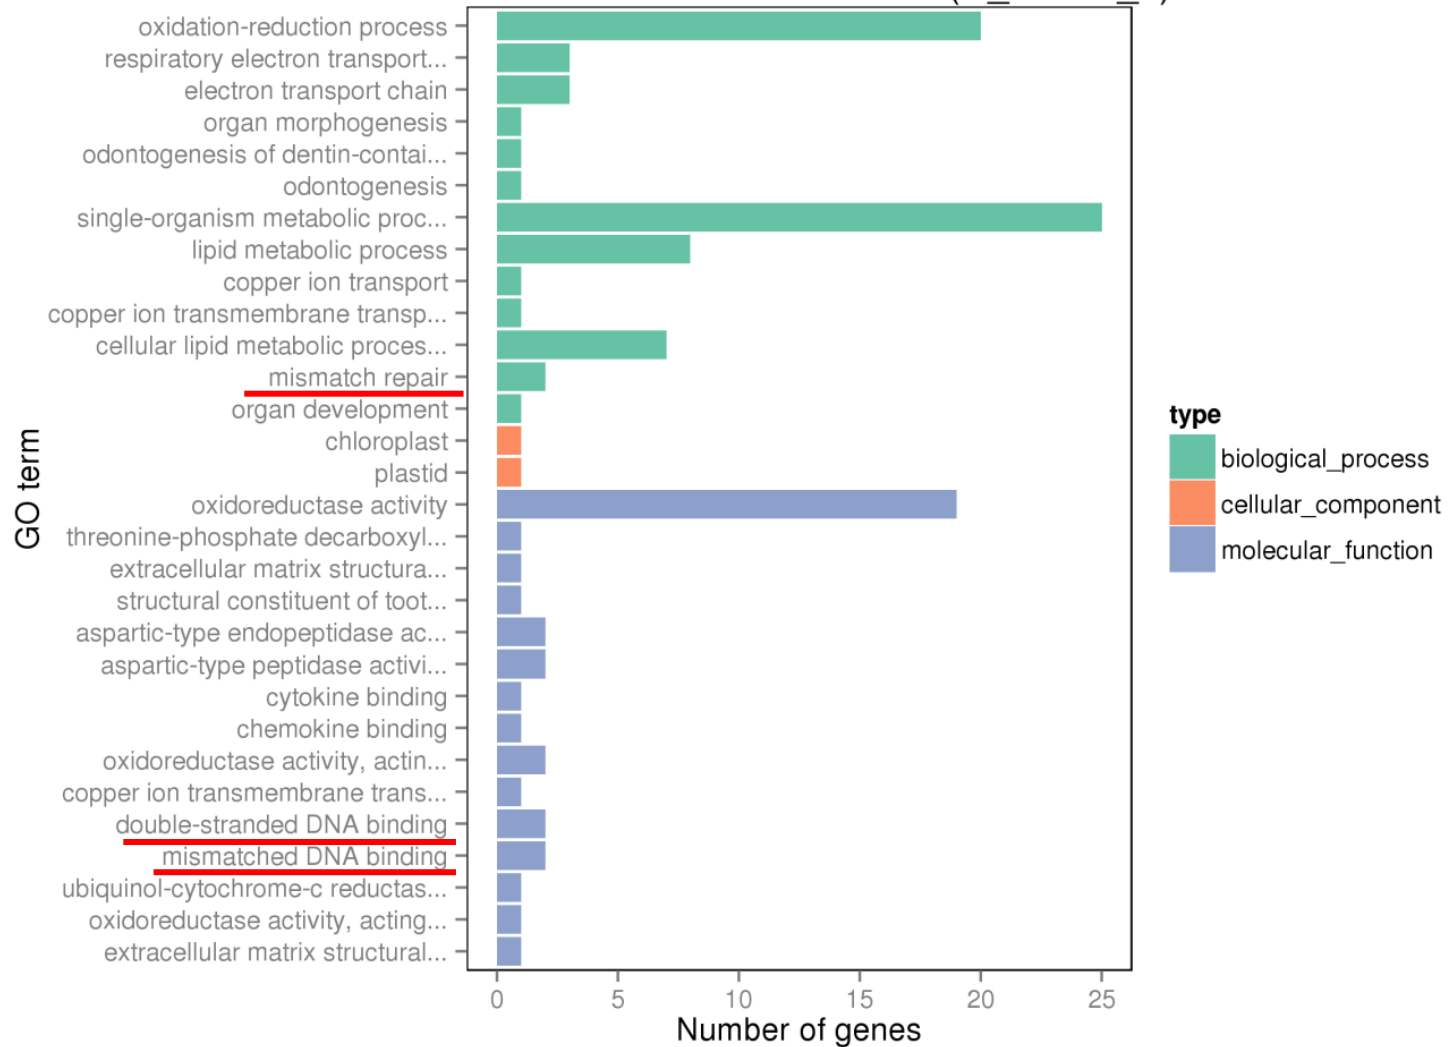

# 6D genes upregulated in RNA degradation/processing

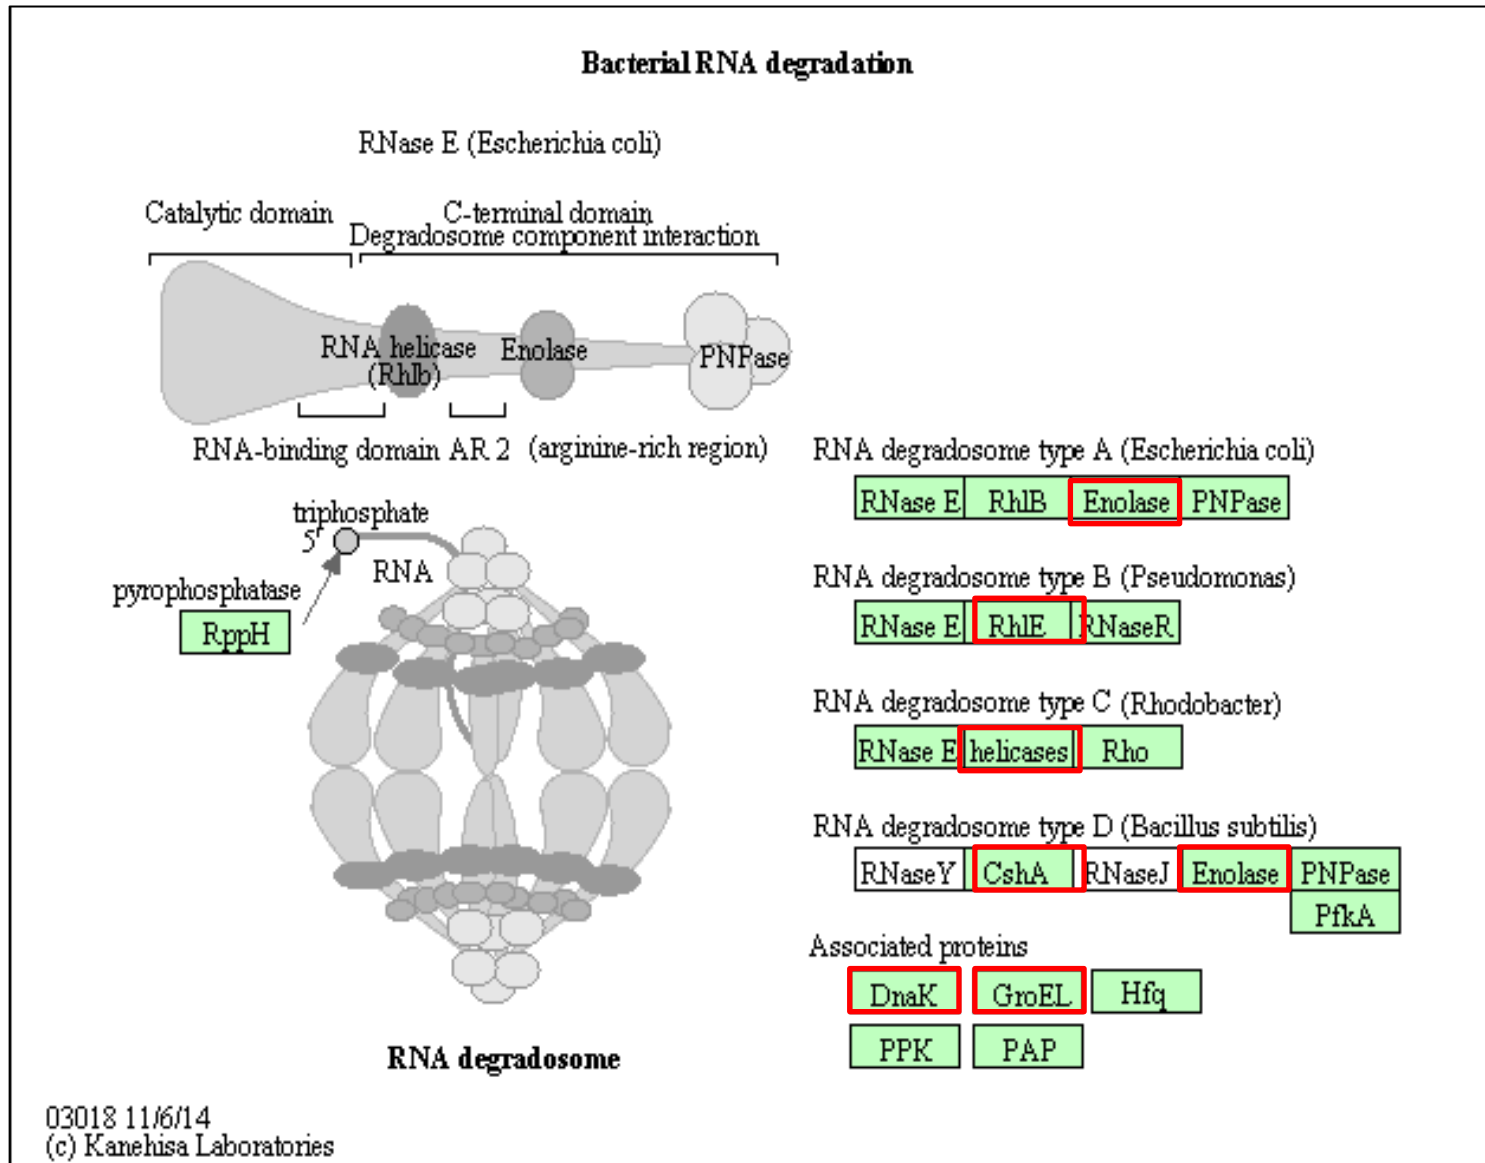

# 6E genes upregulated in mismatch repair/homologous recombination

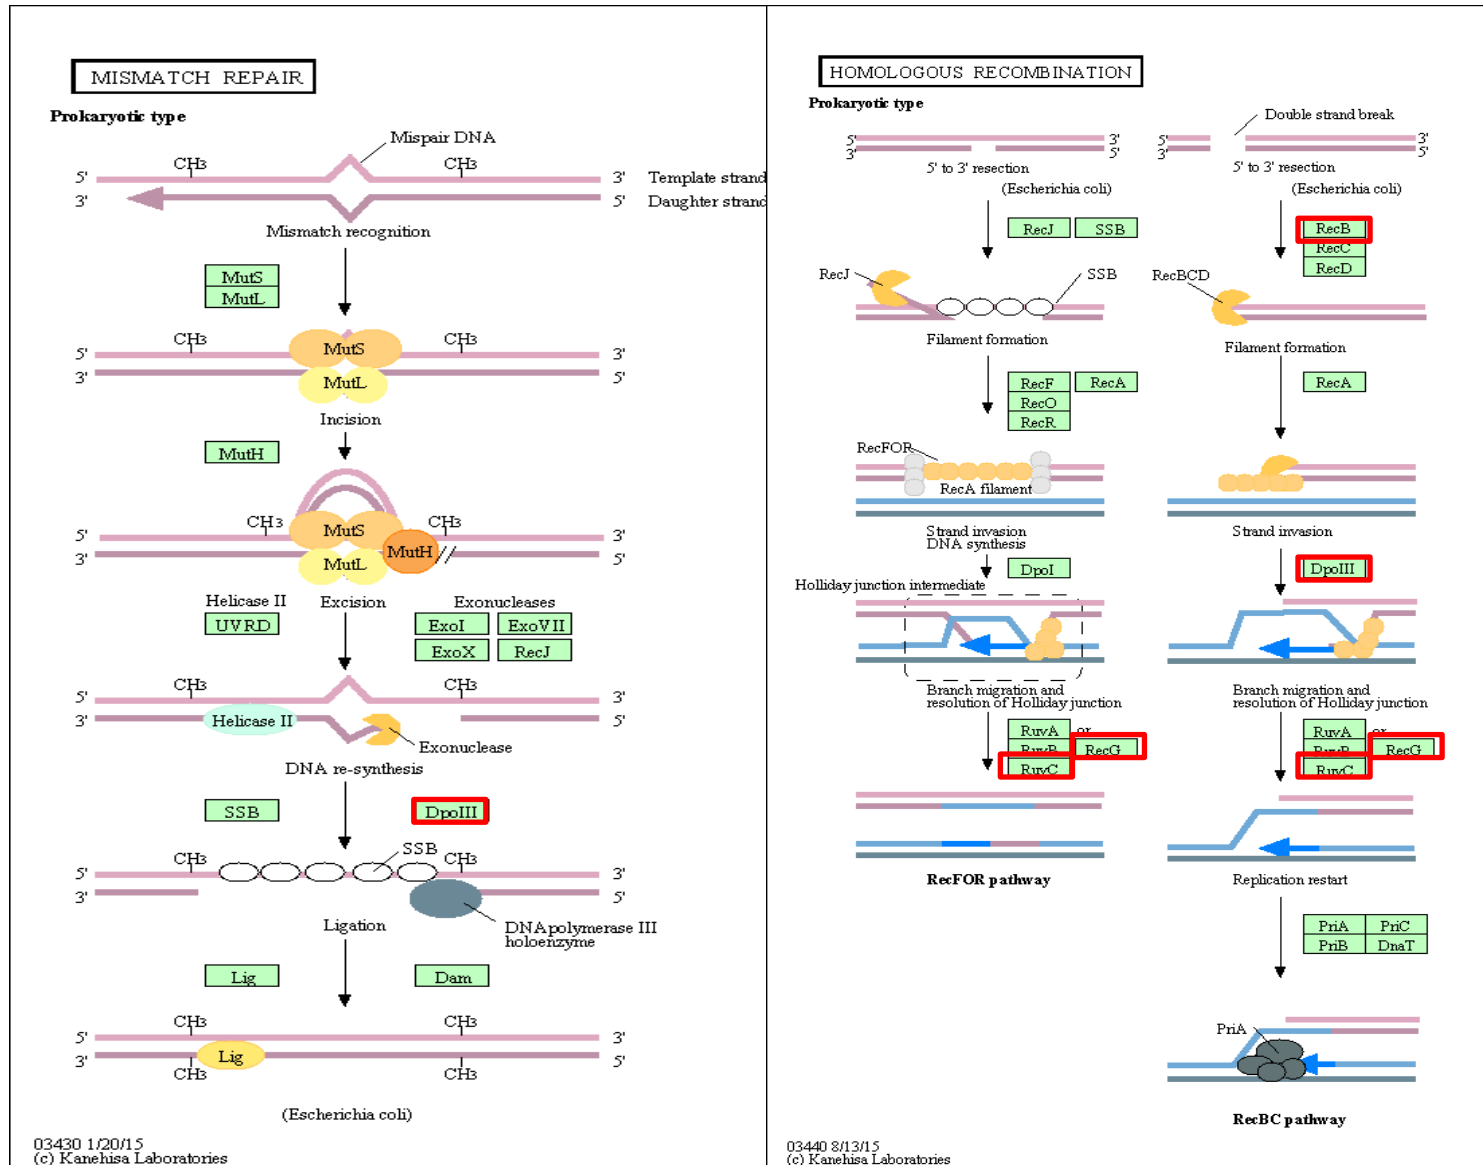

**Fig 7A.** Frameshift repair induced by DNA or RNA oligos (10 nM)

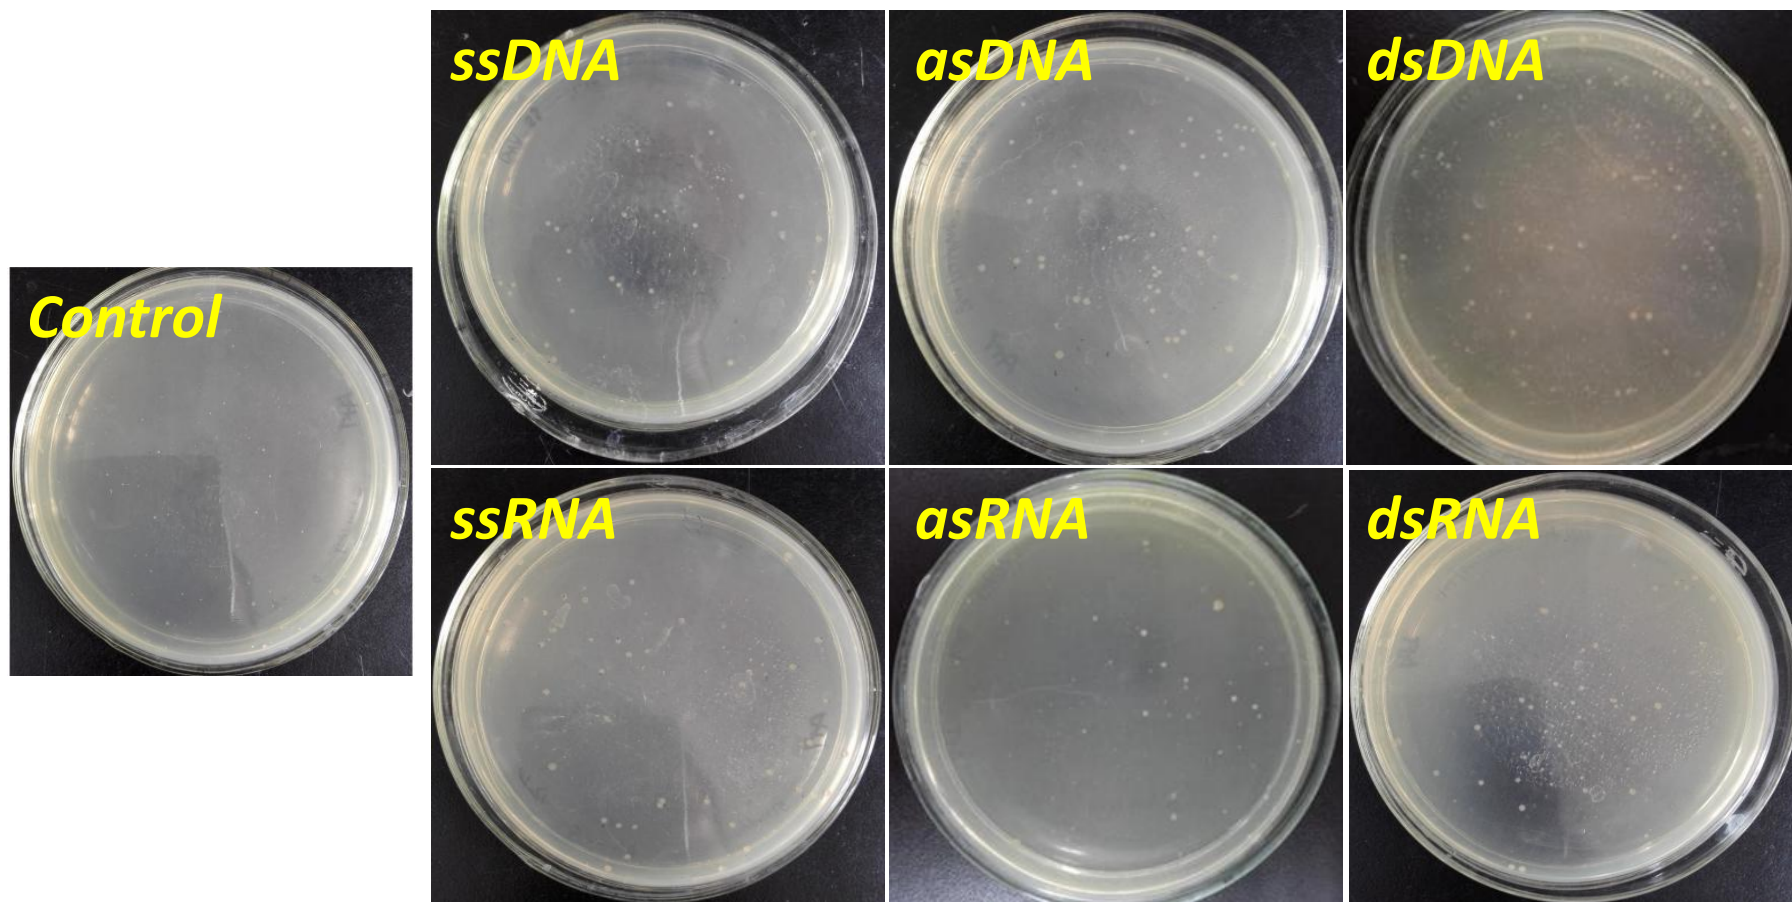



# Fig 7C. Sanger sequencing diagram of the RNA-induced revertants

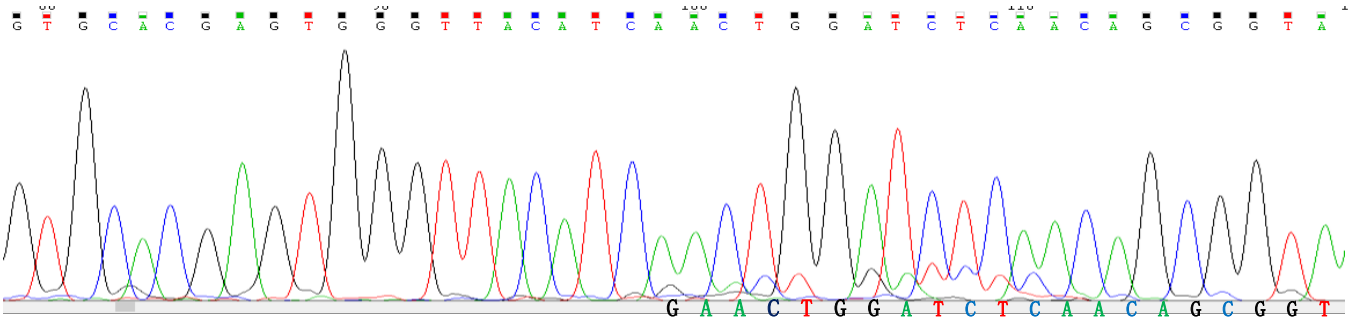

**Main Peaks:** T G C A C G A G T G G G T T A C A T C - A A C T G G A T C T C A A C A G C G G T

**2<sup>nd</sup> Peaks:** T G G A C G A G T G G G T T A C A T C G A A C T G G A T C T C A A C A G C G G T

**RNA ReAmp-G:** U G G A C G A G U G G G U U A C A U C G A A C U G G A U C U C A A C A G C G G U

**Wild-type:** T G C A C G A G T G G G T T A C A T C G A A C T G G A T C T C A A C A G C G G T

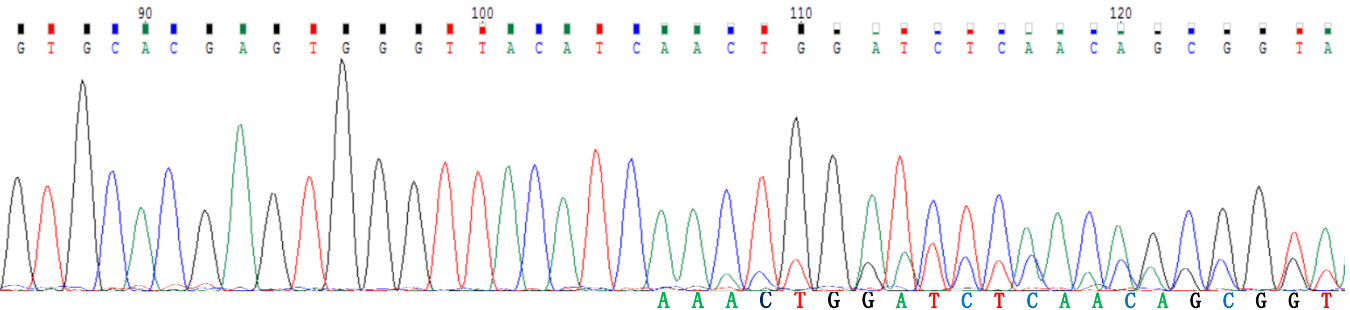

**Main Peaks:** T G C A C G A G T G G G T T A C A T C - A A C T G G A T C T C A A C A G C G G T

**2<sup>nd</sup> Peaks:** T G G A C G A G T G G G T T A C A T C A A A C T G G A T C T C A A C A G C G G T

**RNA ReAmp-A:** U G G A C G A G U G G G U U A C A U C A A A C U G G A U C U C A A C A G C G G U

**Wild-type:** T G C A C G A G T G G G T T A C A T C G A A C T G G A T C T C A A C A G C G G T
