1

2

3

4

5

## **Premature termination codons signal targeted gene repair by**

6

### **nonsense-mediated gene editing in *E. coli***

7

*Xiaolong Wang*<sup>1\*</sup>, *Xuxiang Wang*<sup>1</sup>, *Haibo Peng*<sup>1</sup>, *Chunyan Li*<sup>1</sup>, *Gang Chen*<sup>1</sup>, *Jianye Zhang*<sup>1</sup>,

8

*Michael Lynch*<sup>2</sup>

9

1. *College of Life Sciences, Ocean University of China, Qingdao, 266003, P. R. China*

10

2. *Center for Mechanisms of Evolution, BioDesign Institute, Arizona State University,*

11

*Tempe, AZ, 85287-7701*

12

---

\* To whom correspondence should be addressed: Xiaolong Wang, Department of Biotechnology, Ocean University of China, No. 5 Yushan Road, Qingdao, 266003, Shandong, P. R. China, Tel: 0086-139-6969-3150, E-mail: [Xiaolong@ouc.edu.cn](mailto:Xiaolong@ouc.edu.cn) .

## Abstract

1  
2       Frameshift mutations yield truncated proteins, leading to loss-of-function, genetic  
3 disorders or even death. Reverse mutations, which restore the wild-type phenotype of  
4 a mutant, have been assumed to be far rarer than forward mutations. However, in this  
5 study, screening tests showed that the revertants of a frameshift mutation are detected  
6 more frequently than expected in *E. coli*. Sanger sequencing of the revertants revealed  
7 that the reversion of the frameshift mutation is not caused by random mutagenesis but  
8 by active targeted gene repair. Molecular studies suggest that premature termination  
9 codons (PTCs) in the nonsense mRNAs signal the repair of the frameshift mutation.  
10 Genome survey indicate that the genome sequence of a revertant is stable, confirming  
11 that the DNA replication proofreading/mismatch repair system of the revertant is not  
12 defective. Transcriptome profiling identified dozens of upregulated genes/pathways  
13 that possibly involve in frameshift repair, including DNA replication, RNA processing,  
14 RNA editing, mismatch repair and homologous recombination. Introducing synthetic  
15 DNA or RNA oligonucleotides into the frameshift can promote the gene repair. Based  
16 on these data and an in-depth review of previous studies, we hypothesized a molecular  
17 model for frameshift repair referred to as *nonsense-mediated gene editing* (NMGE):  
18 nonsense mRNAs are recognized by mRNA surveillance by PTC signaling, edited by  
19 RNA editing and then used to direct the repair of their defective coding gene through  
20 mismatch repair and homologous recombination. Moreover, NMGE may also serve as  
21 a driving force for molecular evolution and a new source of genetic diversity, leads to  
22 a widespread existence of frameshift homologs.

## 1 **1. Introduction**

2 DNA replication and DNA repair happen daily in cell division and multiplication.  
3 DNA damage, point mutations, insertions and deletions (indels) can be induced by  
4 chemical and physical mutagens, such as radiation, pollutants, or toxins. In addition,  
5 because of the imperfect nature of DNA replication, mutations and indels also occur  
6 spontaneously as replication errors or slipped-strand mispairing. In a protein-coding  
7 gene, if the size of an indel is not a multiple-of-three, it causes a frameshift mutation,  
8 which results in a substantial change of its encoded amino acid sequence downstream;  
9 in addition, it often produces a number of nonsense codons and yields truncated and  
10 dysfunctional proteins [1], which may lead to a genetic disorder or even death [2-5].

11 The molecular mechanisms/pathways involved in the repair of DNA damages and  
12 point mutations have been intensively studied [6], including mismatch repair, base- or  
13 nucleotide-excision repair, homologous recombination and non-homologous end  
14 joining. The maintenance of reading frames of protein-coding genes is fundamentally  
15 important for cells. A reverse mutation phenomenon was discovered as early as in the  
16 1960s [7]. Point mutations have been explained by random mutagenesis, and it has  
17 been assumed that reverse mutations occur at a lower rate than forward mutations. But,  
18 it remains unclear whether a molecular mechanism exists for the repair of frameshift  
19 mutations (hereafter frameshift repair). However, here we report that the reversion of  
20 a frameshift mutation occurs far more frequently than expected in *E. coli*, and that  
21 they are not randomly produced but involve active targeted gene repair.

## 22 **2. Materials and Methods**

### 23 **2.1 Frameshift mutagenesis and back mutation screening**

24 A plasmid containing a frameshifted  $\beta$ -lactamase gene (*bla*), pBR322-(*bla*-), was  
25 constructed by site-directed mutagenesis (Fig 1): in plasmid pBR322, a G:C base pair,  
26 located in the upstream (+136) of the wild-type *bla* gene (*bla*+), was deleted by using  
27 overlapping extension polymerase chain reaction (OE-PCR). Competent cells of  
28 *Escherichia coli* strain DH5 $\alpha$  were transformed with pBR322-(*bla*-), propagated in  
29 tetracycline broth (TCB), and then diluted cultures were plated on a tetracycline plate

1 (TCP) to count the total number of bacteria ( $N_0$ ) and on ampicillin plates (ACPs) to  
2 screen for and count the number of revertants ( $N_1$ ). The recovery rates were calculated  
3 as  $N_1/N_0$ . The screened revertants were picked and propagated in ampicillin broth  
4 (ACB) at 37°C with 200 rpm shaking and with 1 mL of overnight seed culture in 10  
5 mL ACB. The growth rates of the revertants were evaluated by the doubling time  
6 during their exponential growth phase. Their plasmids DNA were extracted and their  
7 *bla* genes were Sanger sequenced.

## 8 **2.2 Construction and expression of a PTC-free frameshifted *bla***

9 A PTC-free frameshifted *bla*, denoted as *bla*#, was derived from *bla*- by replacing  
10 each nonsense codon with a sense codon according to the *readthrough rules* (Table 1),  
11 and by adding a stop codon (TAA) in the 3'-end. The *bla*# gene was chemically  
12 synthesized by Sangon Biotech, Co. Ltd (Shanghai), inserted into an expression vector,  
13 pET28a, and transformed into competent cells of *E. coli* strain BL21. Plasmid pET28a  
14 contains a kanamycin-resistance gene, therefore the transformed bacteria were plated  
15 on a kanamycin plate (KCP), the transformants were propagated in kanamycin broth  
16 (KCB), plated on ACPs to screen for revertants, and then their *bla* genes were Sanger  
17 sequenced. The expression of the frameshifted BLA was induced by 0.1 mM IPTG.  
18 Their total protein samples were extracted, frameshifted BLA was purified by nickel  
19 column chromatography and analyzed by sodium dodecyl sulfate polyacrylamide gel  
20 electrophoresis (SDS-PAGE). The activity of BLA was measured by iodometry.

## 21 **2.3 Introduction of DNA or RNA oligonucleotides into the frameshift mutant**

22 Competent cells of the frameshift mutant, which contains the defective plasmid  
23 pBR322-(*bla*-), were transformed with a 39-nt synthetic DNA or RNA oligonucleotide,  
24 which has a wild-type or mutated sequence restoring the base pair which was deleted  
25 in OE-PCR. The transformed cells were cultured in TCB at 37°C for 6 hours with 200  
26 rpm shaking, and then diluted cultures were plated on TCPs to count the total number  
27 of bacteria ( $N_0$ ), and on ACPs to screen for and count the number of revertants ( $N_1$ ).  
28 The recovery rates were calculated by  $N_1/N_0$ . The revertants were subcultured in ACB  
29 to test their growth rates, and their *bla* were Sanger sequenced. The growth rates were

1 evaluated by the doubling time during the exponential growth phase by culturing at  
2 37°C with 200 rpm shaking and with 1 mL of overnight seed culture in 10 mL ACB.

### 3 **2.4 Genome resequencing and structure/variation analysis of the *E. coli* strains**

4 Genomic DNA samples were extracted from wild-type (*bla*<sup>+</sup>) and revertant (*bla*<sup>\*</sup>)  
5 strains. Library preparation and genome sequencing were conducted by a commercial  
6 service provided by *Novogene Co. Ltd.* The library was sequenced on an Illumina  
7 HiSeq 250PE platform and paired-end reads were obtained. Raw reads in fastq format  
8 were processed by removing the adapter sequence and low-quality reads. The clean  
9 reads with high quality were mapped onto the reference genome *E. coli* K12 MG1655  
10 (NC\_000913.3) to identify single nucleotide polymorphisms (SNPs), indels and  
11 structure variations (SVs) of each sample. Samtools v0.1.18 was used to sort the reads  
12 and reorder the bam alignments [8]. SNP typing was performed using the genome  
13 analysis tool kit (GATK) [9]. Circos was used to display the coverage of the reads and  
14 the distribution of SNPs and indels on the ring diagram [10]. BreakDancer was used  
15 to detect structure variations [11, 12].

### 16 **2.5 Transcriptome analysis of the *E. coli* strains**

17 Total RNA samples were extracted from the wild type (*bla*<sup>+</sup>), the frameshift (*bla*<sup>-</sup>)  
18 and the revertants (*bla*<sup>\*</sup>) *E. coli* strains. Library preparation and RNA sequencing  
19 were conducted by a commercial service provided by *Novogene Co. Ltd.* After library  
20 preparation and cluster generation, the library was sequenced on an Illumina HiSeq  
21 platform. The paired-end raw reads were processed by removing the adapter sequence  
22 and low-quality reads. The high-quality clean reads were mapped onto the annotated  
23 reference genome, *E. coli* K12 MG1655 (NC\_000913.3), and the expression levels of  
24 each gene were calculated for each sample and compared to each other to identify  
25 differentially expressed genes (DEGs), enriched Gene Ontology (GO) terms and  
26 Kyoto Encyclopedia of Genes and Genomes (KEGG) pathways.

#### 27 (1) *Quantification of gene expression level*

28 Bowtie (v2-2.2.3) was used for index building and aligning the clean reads to the  
29 reference genome [13]. HTSeq (v0.6.1) was used to count the numbers of clean reads  
30 mapped to each gene [14]. And then expected number of Fragments PerKilobase of

1 transcript sequence per Millions base pairs sequenced (FPKM) of each gene was  
2 calculated based on their lengths and read counts.

### 3 (2) *Differential expression analysis*

4 Prior to differential expression gene analysis, for each strain the read counts were  
5 adjusted by the edgeR program [15]. Differential expression of the read counts of two  
6 conditions was performed using the DEGSeq R package (1.20.0) [16]. The P values  
7 were adjusted by the Benjamini & Hochberg method. The threshold for significantly  
8 differential expression were set as: corrected P-value (qvalue) < 0.005 and log<sub>2</sub> (Fold  
9 change) ≥ 1.

### 10 (3) *GO and KEGG enrichment analysis of differentially expressed genes*

11 GO enrichment analysis was implemented by GOseq R package [17], in which  
12 gene length bias was corrected. GO terms with corrected P-value less than 0.05 were  
13 considered significantly enriched by DEGs. KOBAS 2.0 [18] was used to test the  
14 statistical enrichment of DEGs in KEGG pathways (<http://www.genome.jp/kegg/>).

## 15 **3. Results and Analysis**

### 16 **3.1 *The growth of the frameshift mutant and the revertants***

17 The plasmid pBR322 contains two wild-type resistance genes, a β-lactamase gene  
18 (*bla*<sup>+</sup>) and a tetracycline resistance gene (*tcr*<sup>+</sup>). Using OE-PCR, one single G:C base  
19 pair in the upstream of *bla*<sup>+</sup> was deleted (Fig 1). In the resulting frameshift *bla* (*bla*<sup>-</sup>),  
20 seventeen nonsense codons appeared. Because the active sites of BLA, including the  
21 substrate binding site, all locate in the region downstream the deletion, this frameshift  
22 mutation is expected to be a loss-of-function. The plasmid containing a wild-type or a  
23 frameshifted *bla* gene was transformed into *E. coli* (strain DH5α and BL21), then the  
24 transformants were propagated in tetracycline broth (TCB), dilution series were plated  
25 on tetracycline plate (TCPs) to estimate the total number of viable bacteria and plated  
26 on ampicillin plates (ACPs) to test their ampicillin resistance. The wild-type (*bla*<sup>+</sup>)  
27 bacterial grew well on both ACP and TCP (Fig 2A, left); and it was expected that the  
28 deficiency-type (*bla*<sup>-</sup>) bacterial would not grow on ACP. However, repeatedly a few  
29 ampicillin-resistant colonies (*bla*<sup>\*</sup>) were observed (Fig 2A, middle). The possibility of

1 carryover- or cross-contamination was ruled out by blank controls (Fig 2A, right). So,  
2 these ampicillin-resistant colonies were considered as revertants whose *bla*- genes  
3 were repaired by reverse mutations.

4 In addition, although most of the revertants can grow in ACB, the growth rates of  
5 the revertants are often very much slower when compared to the wild-type strain: by  
6 culturing at 37°C with 200 rpm shaking, the wild type took 12 to 24 hrs. to reach the  
7 late log phase, while the revertants took up to 36 to 48 hrs., and many of the revertants  
8 failed to grow when they were subcultured in ACB, even without adding ampicillin.

9 Hitherto, it seems that there is nothing unusual, because the reverse mutations are  
10 fairly common phenomenon, arising from simple random mutations (Fig 3): in DNA  
11 replication, natural or induced mutations occur randomly, a forward mutation causes a  
12 defective mutant or a loss-of-function, and a reverse mutation restores the wild-type  
13 phenotype. Under this view, these revertants survived only because they were ‘lucky’:  
14 their defective *bla* gene restored coincidentally by a reverse mutation, while most of the  
15 other bacteria died without a reverse mutation.

### 16 **3.2 frameshift repair is not a random mutation but a targeted gene repair**

17 The classical random mutagenesis model for reverse mutation sounds faultless in  
18 explaining the reversions of point mutations. However, in a ‘thought experiment’, we  
19 noticed that the model is insufficient to explain the frameshift repair observed herein:  
20 (1) in the model, a bacterium survives if its frameshifted *bla* gene is restored through  
21 random mutagenesis. However, a reverse mutation must occur in the process of DNA  
22 replication or repair in a living cell. If the mutant itself could not live in ampicillin,  
23 the reverse mutations could not occur after they were cultured in ampicillin but must  
24 have occurred before they were cultured in ampicillin; (2) a frameshift mutation can  
25 only be repaired by an appropriate insertion or deletion restoring the reading frame of  
26 the frameshifted gene. However, even if relatively small, a bacterial genome consists  
27 of millions of base pairs over thousands of genes. If the cells did not ‘know’ which  
28 gene is frameshifted, it will be almost impossible to repair it through random insertion  
29 or deletion; (3) In *E. coli*, the rate of point mutation is very low. As determined by  
30 whole-genome sequencing [19], the baseline mutation rate of the wild-type *E. coli* is

1  $\sim 10^{-3}$  per genome (or  $\sim 10^{-9}$  per nucleotide) per generation. The frameshift mutation  
2 rate measured are even about ten-times lower than that of point mutations [19]. It is  
3 generally assumed that reverse mutations occur at a lower rate than forward mutations.  
4 For a certain frameshift mutation, the reverse mutation rate should be extremely low if  
5 it depends on random mutagenesis, because insertions/deletions are far rarer than  
6 substitutions. Therefore, the revertants of a frameshift should be very difficult to be  
7 detected. However, through repeated screening tests, we found that the revertants of  
8 *bla-* can always be detected easily, and it seems that the reversions of the frameshift  
9 mutation occur much more frequently than expected. The measured average recovery  
10 rate of *bla-* was  $2.61 \times 10^{-8}$  per cell division in DH5 $\alpha$  and reached up to  $1.19 \times 10^{-7}$  per  
11 cell division in BL21, both significantly higher than the baseline.

12 Therefore, it is possible that an efficient mechanism specific for frameshift repair  
13 has been developed in the history of life. However, how a frameshifted gene is being  
14 identified and repaired at the molecular level is unknown.

### 15 **3.3 Sanger sequencing of the *bla* genes of the revertants**

16 To investigate how the frameshift gene is repaired, the revertants were picked and  
17 subcultured in ACB. The initial revertants usually grew very slowly, and many of the  
18 subcultures failed to grow, but the surviving subcultures grow faster and faster. Their  
19 plasmid DNA was extracted, and their *bla* were Sanger sequenced. Unexpectedly, in  
20 these initial revertants and subcultures, the *bla* genes are often neither a wild type nor  
21 a revertant, but still frameshifted (Fig 2B, top). It is puzzling how these frameshifted  
22 *bla* could be functional. To clarify this, the subcultures were re-subcultured and their  
23 *bla* were re-sequenced for over 300 replications.

24 In the later subcultures, the sequencing results of the *bla* genes are also often still  
25 frameshifted, but their Sanger diagrams often contain two sets of superimposed peaks  
26 (Fig 2B, middle), indicating that they consist of two types of *bla* sequences: one is the  
27 original frameshifted *bla*, and the other is the repaired one. By visual inspection of the  
28 Sanger diagrams, the repaired sequences of the revertants (*bla\**) were read from the  
29 secondary peaks. Some sequencing diagrams even contain three or more sets of peaks,  
30 but the sequences are nonreadable. In the final fast-growing subcultures, most of their



1 *bla* copies were repaired, and their Sanger diagrams contain few superimposed peaks  
2 (Fig 2B, bottom).

3 As shown in Fig 2C, by aligning *bla*\* sequences against *bla*+ and *bla*- sequences,  
4 it was found that they contain a variety of indels and substitutions, especially G:C $\leftrightarrow$   
5 A:T transitions (Fig 2C, circles). Previously, we developed a novel tool for multiple  
6 sequence alignment, *codon and aa unified alignment* (CAUSA) [20], which can align  
7 and visualize coding sequences and their encoded protein sequences in the same user  
8 interface. As shown in Fig 2D, in CAUSA, it is clearly demonstrated that these *bla*\*  
9 coding genes often contain some stop codons, and the translated protein sequences are  
10 different from, but highly similar to, that of the wild-type BLA if the stop signals were  
11 ignored. In other words, the frameshifted genes are restored far from completely or  
12 immediately, but partially and progressively, resulting in a variety of frameshift  
13 variants, called *frameshift homologs*.

#### 14 **3.4 The genome of the revertant is not highly variable but very stable**

15 As is well known, an extraordinary high rate of spontaneous mutagenesis occurs  
16 over its whole genome in a mutator, such as *E. coli* strain mutD5, due to its defective  
17 proofreading and mismatch repair during DNA replication [21]. The *E. coli* strain we  
18 used in this study, either DH5 $\alpha$  or BL21, is not a mutator, but the frameshift/revertants  
19 obtained may change into mutators if their proofreading and mismatch repair system  
20 is damaged during culturing, so that high-rate of mutagenesis can occur in their  
21 genomes, not only *bla* gene but also other genes.

22 To clarify whether the other genes had also changed, the tetracycline-resistant (*tc*  
23 gene in the same plasmid of the frameshift/revertants was also sequenced by the  
24 Sanger method, but almost no overlapping peaks were observed in their sequencing  
25 diagrams, suggesting that the high-level variations observed in *bla*\* are not a result of  
26 random mutation, but more probably an active gene repair targeting specifically to the  
27 frameshifted *bla* gene, but not to other normal genes.

28 To clarify further whether the frameshift/revertants had changed into mutators,  
29 the genome sequences of a frameshift (*bla*-) and a revertant (*bla*\*) were sequenced by

1 high-throughput NGS sequencing. The obtained clean reads were mapped onto and  
2 compared with the reference genome sequence of the *E. coli* strain K12 (Fig 4A). As  
3 shown in Fig 4B and Table 2, the SNP/indel levels of the revertant and frameshift  
4 tested are both very low, suggesting that their proofreading/mismatch repair system is  
5 not defective. Therefore, they are not mutators, but adopt a stringent proofreading and  
6 mismatch repair strategy during DNA replication. In addition, if the variations of *bla*  
7 are the result of whole-genome random mutagenesis, the number of variations in *bla*  
8 should be proportional to the number of genomic variations, and therefore the genome  
9 sequences of the revertants should contain more variations when compared to that of  
10 the frameshift. But in fact, as shown in Fig 4B and Table 2, the SNP/indel levels of  
11 the revertant are not higher but even lower than those of the frameshift. The number  
12 of variations of *bla* are independent on that of genome variations, suggesting that the  
13 high-level of variations observed in their *bla* are not caused by whole-genome random  
14 mutagenesis, but more probably through an active mechanism specifically targeting  
15 the frameshifted *bla* gene.

16 In addition, genome structure analysis shows that there are quite some structural  
17 variations (SVs) in each of the two genomes tested. However, as shown in Fig 4C and  
18 Table 3, most of the SV sizes are 100~200 bp, approximate to the length of the reads.  
19 The lengths of the SVs should follow a normal or any other skewed distribution, these  
20 equal-length SVs are therefore considered as mostly falsely-mapped reads rather than  
21 true SVs. As is known, NGS sequencing technologies have several major limitations,  
22 especially short read lengths and amplification bias [22], posing serious problems in  
23 sequence assembly, genome mapping and structures analysis. However, thanks to the  
24 extremely high sequencing depth, the SNP/indel data of NGS is considered as valid  
25 and reliable.

### 26 **3.5 PTCs signal the repair of the frameshift mutation**

27 We speculated that it was the PTCs presented in the nonsense mRNAs that signal  
28 the repair of frameshift mutations. To validate this, a *PTC-free bla-* (denoted as *bla#*)  
29 was derived from *bla-* by replacing each nonsense codon with an appropriate sense  
30 codon in accordance with the *in vivo readthrough rules* (Table 1). The *bla#* gene was

1 synthesized chemically, cloned in the plasmid vector pET-28a and expressed in *E. coli*  
2 strain BL21. The *bla#* transformants were plated on ACPs, but no revertant was found.  
3 The *bla#* gene of the transformants were Sanger sequenced, while few variations were  
4 observed, suggesting that the *bla#* gene is not repaired as efficiently as the *bla-* gene.  
5 Analysis of total and purified protein by SDS-PAGE revealed a band corresponding to  
6 the predicted molecular mass (34-kDa), representing the product expressed from the  
7 PTC-free frameshifted *bla* (Fig 5A). No lactamase activity was detected by iodimetry  
8 test of the product (the frameshifted BLA) (Fig 5B), suggesting that it is indeed a  
9 loss-of-function.

10 In summary, the *bla#* gene was kept unchanged and a dysfunctional product was  
11 expressed in its wrong reading frame in *E. coli*. The only difference between *bla#* and  
12 *bla-* is that *bla-* consists of a certain number of PTCs but *bla#* does not. Therefore, it  
13 must be the PTCs that signaled the frameshift repair in the frameshifts. We postulated  
14 that the transcripts of the frameshifted gene (the nonsense mRNAs) must be involved,  
15 because presumably these PTCs can only be recognized in a nonsense mRNA in the  
16 process of translation but not likely possible in a DNA double helix.

### 17 **3.6 Identifying genes/proteins involved in frameshift repair**

18 We speculated that frameshift repair requires the upregulation of relevant genes,  
19 proteins and pathways. By transcriptome sequencing and profiling, as shown in Fig  
20 6A, the gene expression patterns of these strains are significantly different from each  
21 other. When compared to the wild-type (*W*), respectively 292 or 247 genes displayed  
22 upregulated transcription (Fig 6A, Supplementary dataset 1-2) in the frameshift (*FS*)  
23 or revertant (*RE*). In the pathway enrichment analysis, respectively 65 or 58 pathways  
24 were identified as upregulated (Supplementary dataset 3-4). However, the upregulated  
25 genes/pathways are mostly nutrition-related, which do not likely involve in frameshift  
26 repair but more probably due to the different growth conditions of these different cells.  
27 Therefore, we selected the upregulated genes/pathways that most probably involve in  
28 frameshift repair manually. The criterion of selection is whether the gene/pathway is  
29 involved in the processing of the storage of genetic information (DNA or RNA). As  
30 shown in Fig 6B-6C and Table 4-5, the selected upregulated genes/pathways include

1 *DNA replication* (Fig 6D), *RNA degradation/processing* (Fig 6E), *mismatch repair*  
2 *and homologous recombination* (Fig 6F).

3 In addition, the selenocysteinyl-tRNA-specific translation factor (*selB*) gene was  
4 upregulated in one of the two revertants tested (Supplementary dataset 5). SelB is a  
5 specialized translation factor that takes the place of elongation factor EF-Tu, in the  
6 case of selenocysteines being inserted into a peptide chain at the site of a UGA codon  
7 [23, 24]. The upregulation of *selB* suggested that the nonsense codons remained in the  
8 mRNAs might be readthrough in the revertants.

9 By carefully inspecting the list of DEGs (Supplementary dataset 6), we noticed  
10 that the expression levels of the cytosine or isoguanine deaminase gene (*codA*) and  
11 the adenosine deaminase gene (*add*) were upregulated in the frameshift, and those of  
12 the cytidine/deoxycytidine deaminase gene (*cdd*) and the tRNA-specific adenosine  
13 deaminase gene (*tadA*) were also upregulated in the revertant:

- 14 (1) In *E. coli*, cytosine or isoguanine deaminase (CodA) catalyzes the hydrolytic  
15 deamination of cytosine to uracil, and also the deamination of isoguanine, a  
16 mutagenic oxidation product of adenine in DNA, and of isocytosine [25, 26].  
17 In eukaryotes, cytosine deaminase is involved in RNA editing [27].
- 18 (2) In *E. coli*, cytidine/deoxycytidine deaminase (Cdd) scavenges exogenous and  
19 endogenous cytidine and 2'-deoxycytidine for uridine monophosphate (UMP)  
20 synthesis [28-33]. In eukaryotes, cytidine/deoxycytidine deaminase is also  
21 involved in RNA editing [34, 35].
- 22 (3) In *E. coli*, adenosine deaminase (Add) is an inducible enzyme that converts  
23 adenine, adenosine, and deoxyadenosine to guanine nucleotides [36-38]. In  
24 eukaryotes, adenosine deaminase (ADAR2) is an important enzyme which is  
25 responsible for RNA editing [39-51].
- 26 (4) The tRNA-specific adenosine deaminase (TadA) catalyzes the deamination  
27 of adenosine to inosine at the wobble position 34 of tRNA-Arg2. TadA was  
28 first identified in yeast [52] and the first prokaryotic RNA editing enzyme to  
29 be identified in *E. coli* [53] and found widely exist in bacterial [53-56]. TadA

1 is related to the eukaryotic RNA editing enzymes, ADAR1 and ADAR2 [52],  
2 which widely exist in human [57] mouse [58] and fruit fly [59].

3 As above mentioned, Sanger sequencing showed that the base substitutions in the  
4 repaired *bla* are mostly G:C $\leftrightarrow$ A:T transitions, suggesting that they are derived from  
5 deamination of DNA bases. As is known, DNA deamination generates deoxyinosine  
6 from deoxyadenosine, which links DNA mismatch repair and RNA editing [60]. Here  
7 we show that DNA deamination and mismatch repair pathways are upregulated in the  
8 frameshift, suggesting that RNA-editing and mismatch-repair are probably both  
9 involved in frameshift repair. These genes are also upregulated in the revertant,  
10 suggesting that gene repair is still ongoing in the revertants. As mentioned above, the  
11 genome sequence of the revertant is not highly variable but stable, suggesting that  
12 these upregulated genes are tightly controlled, their function is restricted specifically  
13 to the target gene, and thus do not cause many off-targeted variations in their genomes.  
14 However, further experimental investigation is needed to validate the regulation and  
15 the function of many of these genes in the repair of frameshift mutations.

### 16 **3.7 Both DNA and RNA can direct the repair of frameshift mutation**

17 Synthetic DNA oligonucleotides have been widely used for targeted gene repair  
18 [61-63]. Here, competent cells of the frameshift mutants (*E. coli* strain DH5 $\alpha$  or BL21)  
19 were transformed by heat-shocking with a 39-nt synthetic sense (ss-), antisense (as-)  
20 or double-stranded (ds-) DNA, having a wild-type (WT) or mutated (MT) sequence to  
21 recover the base which was deleted in the OE-PCR. The recovery rate ( $f_r$ ) was very  
22 low and unstable in DH5 $\alpha$ , but much higher and more stable in BL21. We performed  
23 statistical analysis on the data of BL21. As shown in Fig 7A-7B, in the blank or  
24 heat-shock-only control groups, the average  $f_r$  is  $1.19 \times 10^{-7}$  and  $1.30 \times 10^{-7}$ , respectively,  
25 suggesting that heat-shock does not bring significant difference to the recovery rate by  
26 itself. Comparing with the blank control group, on average  $f_r$  increased to 1.93-fold in  
27 the ss-DNA group, 6.72-fold in the as-DNA group and 2.94-fold in the ds-DNA group,  
28 respectively, of which differences are all significant (F-test  $P < 0.01$ ). These data are

1 consistent with other's previous studies that both sense- and antisense-DNA can  
2 induce targeted gene repair [64].

3 It has also been reported that synthetic RNA oligos, DNA/RNA complexes and  
4 endogenous transcripts can direct the repair of DSBs of DNA [65-70]. We postulated  
5 that synthetic RNAs can also promote frameshift repair if the NMGE model is correct.  
6 To validate this, the frameshift mutants (strain DH5 $\alpha$  or BL21) were transformed with  
7 a 39-nt WT or MT RNA to recover the base deleted. The MT RNA caused an increase  
8 of  $f_r$  to 3.58-fold, however, it is surprising that the WT RNA caused a decrease of  $f_r$  to  
9 0.51-fold (Fig 7B). The differences of the recovery rates among different groups are  
10 all significant by F-test, unfortunately, however, are not significant by t-test, because  
11 their standard deviations are very large (Fig 7B).

12 For each group, the *bla* genes were sequenced to test whether they were repaired  
13 or not. The Sanger diagram showed that a designed base was inserted into the repaired  
14 *bla* gene in both the ssDNA (Fig 7C) and the ssRNA group (Fig 7D). In the control  
15 group, the type and location of the inserted base are both unpredictable; in the ssDNA  
16 or ssRNA group, however, the type of the insertional base is often consistent with the  
17 designed type, and the location of the inserted base is exactly at the site of deletion,  
18 suggesting that, like DNA, RNA can also direct targeted gene repair by itself.

19 Homologous recombination must play an important role in frameshift repair, as  
20 the average recovery rate measured in BL21 (recA+) is significantly higher than that  
21 of DH5 $\alpha$  (recA-). However, homologous recombination may not be the only pathway  
22 responsible for frameshift repair. In all DNA, RNA and control groups, G:C $\rightarrow$ A:T  
23 substitutions were often observed in the repaired *bla* (Fig 7C). In the ssRNA group,  
24 G:C $\rightarrow$ A:T substitutions were also often observed. In addition, MT-ssRNA-136-A, a  
25 ssRNA designed with an G $\rightarrow$ A substitution, not only resulted in an increased average  
26 recovery rate in BL21 (Fig 7B), but also efficiently introduced the substitution into  
27 the repaired *bla* (Fig 7D), suggesting that mismatch repair and/or RNA editing might  
28 be involved in the repair.

## 1 **4. Discussion**

### 2 **4.1 A new model for the repair of frameshift mutations**

3 The mechanisms for the repair of DNA damages and point mutations have been  
4 well-understood. However, the molecular mechanism for the recognition and repair of  
5 frameshift mutations is unknown at present. To gain further insight, we conducted an  
6 in-depth literature survey of previous studies that covered a wide range of prokaryotic  
7 and eukaryotic organisms. We put many of these fragmentary evidences together by  
8 presuming that the molecular mechanism of frameshift repair exists and is conserved  
9 among prokaryotic and eukaryotic species. Based on our studies and many others, we  
10 hypothesize a molecular model for frameshift repair, referred to as *nonsense-mediated*  
11 *gene editing* (NMGE), consisting of six main steps as follows (Fig 8):

12 **Step 1. Nonsense mRNA recognition:** in principle, a frameshift coding gene cannot  
13 be recognized at DNA level, and therefore must be first transcribed before it can  
14 be recognized. When a frameshift gene is transcribed, a number of nonsense  
15 mRNAs are produced. The frameshifted transcripts are recognized as nonsense  
16 mRNAs by RNA surveillance [71-77]. The stop codons emerge inside a  
17 frameshifted gene or mRNAs are called premature termination codons (PTCs)  
18 [78-80] , also known as hidden stop codons (HSCs) [1]. When an nonsense  
19 mRNA is translated, the ribosomes are blocked when they encounter the PTCs  
20 [81]. Nonsense mRNAs are identified through mRNA surveillance, and usually  
21 causes mRNA decay [82-85].

22 **Step 2. Nonsense mRNA processing:** In eukaryotes, nonsense-mediated mRNA  
23 decay (NMD) is the best-studied nonsense mRNA processing pathway [86-88].  
24 NMD targeting mRNAs harboring PTCs for degradation enhances their decay  
25 rate and reduces the abundance of the mRNA transcribed from that gene. In  
26 bacteria, it is not yet clear how nonsense mRNAs are processed, but it is known  
27 that the quality of their mRNAs is also tightly controlled [89]. Therefore, we  
28 speculate that NMD may also exist in bacteria, although it has not been  
29 characterized. Nevertheless, in both prokaryotes and eukaryotes, nonsense

1 mRNAs must be processed by one of the pathways, either degradation (step 2),  
2 translation (step 3), or editing (step 4).

3 **Step 3. *Nonsense mRNA translation:*** Nonsense mRNAs are not always fully  
4 degraded but sometimes translated. Frameshifted or nonsense-mutated coding  
5 genes can be expressed through some special mechanisms, including  
6 programmed translational frameshifting [90-97] and translational readthrough  
7 [98-101]. Especially, if the target gene is essential, a cell survives only if it  
8 produces functional proteins by translating a nonsense transcript/mRNA and dies  
9 if no protein is produced or the products are truncated or nonfunctional.

10 **Step 4. *RNA editing:*** nonsense mRNAs must be involved in the recognition and  
11 repair of the frameshift mutation, but a nonsense mRNA is defective by itself, and  
12 thus, cannot template the repair of its coding gene directly, therefore, it is more  
13 likely that the nonsense mRNAs are modified by RNA editing prior to templating  
14 the repair. Nonsense mRNAs can be recognized by PTC signaling, but it might be  
15 impossible for cells to locate the frameshift-causing indel exactly, either in the  
16 genomic DNA or transcripts, and thus, not always possible to restore the original  
17 coding sequence. In addition, a cell cannot distinguish whether a PTC is caused  
18 by an indel or by a point mutation. Therefore, the cells can only insert, delete and  
19 substitute nucleotides in the nonsense mRNAs within or nearby a PTC, resulting  
20 in a variety of variants. After editing, the repaired mRNAs are translated again,  
21 and the remaining PTCs are translated each into an appropriate amino acid by  
22 translational readthrough.

23 **Step 5. *RNA-directed DNA repair:*** to repair the frameshifted coding gene, mRNAs  
24 are transported back to chromosomal DNA to localize its defective coding  
25 sequence. the defective coding gene is repaired by using an edited mRNA as the  
26 template. A bacterium recovers if functional mRNAs and proteins are produced  
27 by a normal transcription and translation process.

28 As abovementioned, substantial evidence suggests a direct link between RNA  
29 editing and DNA repair, which can also support this NMGE model. However, further



1 systematic experimental investigations are needed to elucidate this process in detail  
2 and validate it in other species, especially the eukaryotes.

### 3 4.2 *The NMGE model better explains the variations of the bla genes*

4 As shown by a question mark in Fig 8, there exist two possible strategies: (1)  
5 *direct NMGE*: using an original nonsense mRNA to identify the defective coding  
6 sequence, and then editing it by DNA-level mutagenesis; however, whether or not the  
7 edited CDS is repaired, it must be transcribed and translated again to be functional; (2)  
8 *indirect NMGE*: the nonsense mRNAs are first edited, and then transported back to  
9 DNA to identify the CDS and to template the gene repair, *i.e.*, a nonsense mRNA is  
10 functionalized through RNA editing prior to directing the repair of its own CDS.  
11 Compared to the direct strategy, indirect NMGE may be more efficient, because DNA  
12 repair only happens in a living cell gaining a functional mRNA by RNA editing.

13 As described above, distinct types of bases were substituted, inserted or deleted in  
14 the *bla* genes of the revertants. These editing events are mostly located near to or in  
15 the downstream of the frameshift-causing indel, but not in the distant upstream (Fig  
16 2B-2C). This phenomenon can only be explained by the PTC-signaled RNA editing in  
17 the nonsense mRNAs: the PTCs presented downstream the indel may not only signal  
18 the recognition of nonsense mRNA but serve as flags for RNA editing. Because the  
19 PTCs appear in nonsense mRNAs only downstream of the indel, PTC-signaled RNA  
20 editing are restricted near to or in the downstream of the indel, potentially also restrict  
21 DNA editing to the corresponding region in the coding gene. Therefore, the frameshift  
22 mutation might be repaired by editing the nonsense mRNAs rather than the CDS  
23 directly. It is also possible that sometimes editing may cause even more problems in a  
24 nonsense mRNA, while these non-repaired mRNAs can be recycled or degraded. This  
25 process is repeated in cells until the PTCs in their *bla* genes are completely eliminated.  
26 When the cells are cultured in ampicillin media, the fate of a cell depends on whether  
27 it can produce a sufficient amount of functional proteins. By transcribing, each copy  
28 of a target gene can produce many copies of nonsense mRNAs, each of which might  
29 be edited in a different way, without changing the coding DNA sequences. Therefore,

1 the probability of producing a functional mRNA by editing nonsense mRNAs can be  
2 much higher than that of random mutagenesis in their coding sequences.

### 3 4.3 *The NMGE model better explains the growth of the revertants*

4 As abovementioned, frameshift repair is not genially a sudden + complete event  
5 but a progressive process. Interestingly, the sizes of wild-type colonies are uniform  
6 (Fig 2A), showing that they are uniform in growth rates; while the sizes of revertant  
7 colonies varied greatly (Fig 7A), indicating varied growth rates associate with the  
8 diversified activities of their BLA. Compared with random mutagenesis, NMGE not  
9 only better explains the high-level variations of the *bla* genes, but also the diversified  
10 growth rates of the revertants:

11 (1). In the initial revertants, whose *bla* genes were still frameshifted, survival can  
12 be explained in three possible ways: (a) the frameshifted *bla* is translated by  
13 *ribosomal frameshifting*, producing a wild-type BLA; (b) the frameshifted *bla*  
14 is translated by *translational readthrough*, producing a functional, partially  
15 frameshifted BLA; (c) the initial slowly-growing revertants may also contain a  
16 few copies of repaired *bla*, with the proportion of the repaired *bla* being too  
17 low to be detected by Sanger sequencing. As pBR322 is a multi-copy plasmid,  
18 it might be sufficient to support the survival of the host in ampicillin even  
19 when only a small proportion of its copies are repaired. The host bacterial  
20 grow slowly, and many of them failed to grow, probably due to these abnormal  
21 processes are very time- and resource-consuming, as cell energy and resources  
22 would be depleted for gene repair if the defective *bla* is not repaired soon.

23 (2). By NMGE, the *bla* genes were repaired progressively, not only before but also  
24 after culturing in the ampicillin media. As the substrate of BLA, ampicillin is  
25 neither the cause nor the terminator of the gene repair, but a selection pressure  
26 to screen and display the revertants, which is the result of gene repair.

27 (3). NMGE is triggered by the PTCs presented in the *bla* mRNAs, and the aim of  
28 NMGE is to eliminate these PTCs. In the initial revertants, there are so many  
29 PTCs in the *bla* mRNAs that the probability of producing a functional product

1 by mRNA editing is very low, so their growth rates and survival rates are very  
2 low, as most revertants died before their *bla* were sufficiently repaired.

3 (4). Later, in revertants whose *bla* are being repaired, with less and less remaining  
4 PTCs, energy and resources are used less and less for gene repair, more and  
5 more for growth, their growth rates and survival rates recover gradually.

6 (5). Finally, gene repair complete if all nonsense codons are eliminated. The *bla*  
7 coding genes are recovered, not necessarily the same as the original wild-type,  
8 but consisting of a variety of variants, whose growth rates may become normal,  
9 slower, or sometimes even faster.

10 Previously, we have reported that the genetic code, the protein-coding genes and  
11 genomes of all species are nearly optimal for frameshift tolerance [102]. Widespread  
12 premature termination codons were recently observed in human [78] and fruit fly [103]  
13 populations, suggest the ongoing evolutionary plasticity at the genetic level in modern  
14 human and other species. In this study, we further demonstrate that PTCs signal the  
15 frameshift repair. Frameshift mutations in protein-coding genes are repaired through  
16 NMGE, resulting in a variety of frameshift homologs, many of which are functional  
17 and preserved in nature. Therefore, the widespread existence of frameshift homologs  
18 among species may be considered as natural evidence for this model. In short, NMGE  
19 is not only a molecular mechanism for frameshift repair, but also be a driving force  
20 for molecular evolution and a source of genetic diversity.

#### 21 4.4 *Previous studies are supportive to this NMGE model*

22 In the above, we proposed that NMGE depends on RNA-directed DNA repair but  
23 is triggered by PTCs, and the nonsense mRNAs are edited prior to directing the repair  
24 of the coding DNA. When a frameshift mutation occurs, the defective gene is repaired  
25 not by direct gene editing but by NMGE. Although it may seem surprising, but in fact  
26 it is more reasonable than direct gene editing. The above proposed NMGE model well  
27 explains our observations and is supported by numerous previous studies. In fact, the  
28 model is an integration of several key links, which have already been quite clear:

29 (1). *mRNA decay is linked to other nonsense mRNA processing pathways*

1 Nonsense-mediated mRNA decay (NMD) is the best-studied nonsense mRNA  
2 processing pathway [86-88]. In eukaryotes, NMD uses the presence of an exon  
3 junction complex (EJC) downstream of PTCs as a second signal to distinguish a PTC  
4 from a true stop codon [104]. In addition to NMD, the nonsense mRNAs may also be  
5 subject to other nonsense-mediated pathways, such as *translational repression* [105],  
6 *transcriptional silencing* [106], and *alternative splicing* [107], all of which are  
7 connected to NMD [105-107]. In eukaryotes, the NMD regulating factors, including  
8 three interacting proteins, UPF1, UPF2 (also known as NMD2) and UPF3, are  
9 encoded by highly conserved genes originally identified in yeast [108].

10 Frameshifted or nonsense-mutated coding genes can be expressed through some  
11 special mechanisms, including ribosomal frameshifting [90-97] and translational  
12 readthrough [98-101]. Ribosomal frameshifting occurs in all known organisms, from  
13 *E. coli* to mammals [109-112], whereby the ribosome is guided toward a triplet codon  
14 that is shifted one base position to the upstream (+1) or downstream (-1). In yeast,  
15 telomere maintenance is globally controlled by the ribosomal frameshifting process  
16 and NMD [97]. Translational readthrough is a process wherein a nonsense mRNA is  
17 translated by translating PTCs each into a specific amino acid [113-117]. Mutations in  
18 *upf* genes caused nonsense suppression and subsequent readthrough in yeast and 5-20  
19 fold decreases in the rates of NMD [118], suggested a direct link between NMD,  
20 nonsense suppression and readthrough. The three Upf proteins all interact with Sup35,  
21 and Upf1 interact further with a second release factor, Sup45 (eRF1), and binding of a  
22 SMG-1-Upf1-eRF1-eRF3 (SURF) complex to EJC triggers Upf1 phosphorylation and  
23 NMD [119]. In addition, the nonsense suppression caused by *upf* mutations is additive  
24 to those by *sup35* and *sup45* mutations [120], suggesting that nonsense suppression is  
25 a nonsense-mRNA processing pathway alternative to NMD. In summary, although  
26 nonsense mRNAs usually lead to translation errors and NMD, when NMD is inhibited,  
27 they can also be translated by translational frameshifting, nonsense suppression or  
28 translational readthrough.

29 (2). ***RNA can direct DNA repair***

1 We here demonstrated that many G:C→A:T substitutions were observed in the  
2 repaired *bla* in the revertants; in addition, four deaminase genes (*codA*, *cdd*, *add* and  
3 *tadA*) and the mismatch repair genes/pathways were upregulated in the frameshift  
4 and/or the revertant. We therefore speculate that mismatch repair and RNA editing are  
5 both involved in frameshift repair. The details of the mechanism of nonsense mRNA  
6 editing and how it connects to DNA repair has not been made clear.

7 All types of RNAs are subject to translation, degradation or processing, and a  
8 variety of molecular/cellular mechanisms are involved in RNA processing [121]. In  
9 the last few decades, studies have established a link between DNA repair and RNA  
10 processing. For example, several proteins respond to DNA damage and base-excision  
11 repair enzymes, such as SMUG1, APE1 and PARP1, have been shown to participate  
12 in RNA surveillance and processing [122].

13 As is known, RNA is transcribed in the nucleus and then transported to the  
14 cytoplasm in eukaryotes [123]. Recently, there is growing evidence that RNAs can  
15 also be transported back to the nucleus to repair DNA double strand breaks (DSBs), a  
16 process known as *RNA-directed DNA Repair* [65-70]. In yeast [69, 70] and human  
17 embryonic kidney (HEK-293) cells [124], not only a synthetic DNA/RNA hybrid, but  
18 also a RNA-only oligonucleotide can serve as a template for DNA synthesis for the  
19 repair of a DSB in a homologous DNA. In *E. coli*, short RNA patches can also direct  
20 DNA modification [124, 125]. However, this is the first report that RNA also can  
21 direct precise and targeted repair of a frameshift mutation by itself. Although this  
22 process is not yet clear in detail at the molecular level, mismatch repair and  
23 homologous recombination are likely to be involved, as they are both upregulated in  
24 the frameshift and the revertant tested (Fig 6F).

25 **(3). RNA editing is linked to DNA repair:**

26 RNA editing has been studied extensively and intensively [126-130], suggesting  
27 that RNA editing exists in many species, including *E. coli* [34], kinetoplastids [131],  
28 trypanosomes [132], plants [133, 134], mammals [135] and human [136-143].  
29 Although there are several different mechanisms of RNA editing, such as A-to-I editing

1 [144-147], C-to-U editing [148-152], and the insertion/deletion of uridine [153-155],  
2 the basic schematism are conserved among species. In particular, the nonsense *apoB*  
3 mRNA editing complex suppresses its own decay by NMD [156], suggesting that  
4 nonsense mRNAs can be subjected to RNA editing, which is linked to NMD.

5 Both DNA mismatch repair and RNA editing involve deamination, the removal of  
6 an amine group from a DNA/RNA molecule. Enzymes that catalyze this reaction are  
7 called DNA/RNA deaminases. Deamination of DNA deoxyadenosine bases generates  
8 deoxyinosine, create missense mutations predisposing humans to cancer, and interfere  
9 with other molecular genetic processes. Cytidine deamination was discovered first in  
10 wheat as a mechanism of mRNA editing [157, 158]. The characterization of the  
11 tRNA-specific adenosine deaminases (ADATs) has led to the suggestion that these  
12 enzymes, as well as the cytidine/adenosine deaminases (CDARs/ADARs) acting on  
13 pre-mRNAs, belong to a superfamily of RNA dependent deaminases [159]. The first  
14 example of C→U editing is the apolipoprotein B (*apoB*) mRNA, in which a single,  
15 site-specific cytidine deamination introduces a stop codon (UAA) into the reading  
16 frame of the edited transcript [160]. It is well known that deamination based RNA  
17 editing plays many important roles, and aberrant or dysregulated RNA editing might  
18 contribute to genomic instability in cancer [161]. In eukaryotes, several studies have  
19 provided evidence that deamination is related to both DNA repair and RNA editing.  
20 For example, endonuclease V, which is highly conserved from *E. coli* to human [60],  
21 is involved in excision repair that removes deoxyinosine from DNA.

22 TadA, the first prokaryotic deaminase for RNA editing identified in *E. coli*,  
23 displays sequence similarity to the yeast tRNA deaminase subunit Tad2p [53]. In  
24 addition, cytidine deaminase (CodA) has been used as a molecular model for RNA  
25 editing and a mechanism for RNA substrate recognition [34]. These studies suggest  
26 that RNA editing is conserved between prokaryotes and eukaryotes, and a direct link  
27 between the regulation of mismatch repair and RNA editing, and therefore support our  
28 speculation that mismatch repair and RNA editing may both involve in frameshift

1 repair. However, the details of the mechanism of nonsense mRNA editing and how it  
2 connects to DNA repair has not been made clear.

### 3 ***4.5 The possibility of RNA-only gene/genome editing***

4 CRISPR/Cas9 for RNA-guided genome editing [162-164] has been widely used  
5 for the introduction or correction of specific mutations, which can be used to repair  
6 disease-causing frameshift/point mutations [165, 166]. However, present RNA-guided  
7 genome editing requires the transferring of foreign genes or proteins in the host cells.  
8 Deoxyoligonucleotide-based targeted gene repair [61, 62] could be more favorable  
9 and convenient due to its non-transgenic properties, but suffers from inefficiency  
10 because it relies on the induction of the endogenous DNA repair system while in the  
11 meantime being suppressed by mismatch repair [63].

12 In addition, synthetic DNA oligonucleotides have been widely used for targeted  
13 gene repair [61-63]. And it has also been reported that synthetic RNA or DNA/RNA  
14 complexes can direct the repair of double-strand breaks of DNA [65-70], but it has  
15 never been reported that endogenous mRNA can be edited and used to direct targeted  
16 gene repair. By transforming short synthetic RNAs, here we demonstrated that RNA  
17 can direct targeted gene repair by itself alone. It seems that RNA-directed gene repair  
18 is very inefficient and unstable, probably owing to the degradation of the naked RNAs  
19 by intra- or extra-cellular RNases. If the short RNA strands were protected by certain  
20 artificial packaging materials, it would probably result in increased efficiencies for  
21 RNA gene editing. In eukaryotes, liposome, polyethylenimine, and nano materials has  
22 been widely used for carrier agents to improve the transportation, distribution and  
23 retention of therapeutic nucleic acids within host cells, but methods for transferring of  
24 DNA/RNA into bacterial are restricted to heat shock or electroporation. Nevertheless,  
25 the components of NMGE, including RNA editing, mismatch repair and homologous  
26 recombination, are essential pathways highly conserved among various species from  
27 bacteria to human. Therefore, if NMGE is confirmed to be conserved, it is potentially  
28 possible that genes and genomes can be edited by using RNA-only molecules without  
29 introducing any exogenous gene or protein.

## 1 Author Contributions

2 Xiaolong Wang conceived the study, designed the experiments, analyzed the data and  
3 wrote the paper. Xuxiang Wang, Chunyan Li, Haibo Peng and Yalei Wang performed the  
4 experiments. Gang Chen and Jianye Zhang provided some equipment and materials, Michael  
5 Lynch supported this study, gave conceptual suggestions, and revised the manuscript.

## 6 Acknowledgements:

7 This study was supported by The *National Natural Science Foundation of China* (Grant  
8 No. 31571369).

## 9 Figure legends

10 **Fig 1. The introduction of a frameshift mutation in the upstream of the *bla* gene in the**  
11 **plasmid pBR322.** Sanger sequencing diagram of: (A) the wild type (*bla*+); (B) the frameshift  
12 mutant (*bla*-). (C) Alignment of the nucleotide sequence of *bla*+ and *bla*-.

13 **Fig 2. Growth of the wild-type/frameshift *E. coli* and sanger sequencing of the *bla* genes:**

14 (A) Growth of the wild-type and frameshift *E. coli* on ampicillin- or tetracycline plates: *bla*+ : wild  
15 type; *bla*- : frameshift; *bla*\* : revertants; *blank* : blank control

16 (B) The Sanger diagram of the *bla* genes of the revertants: *Top* : in the initial revertants, most of  
17 the *bla* genes are still frameshifted; *Middle* : in the later subcultures, sequencing diagrams contains  
18 two sets of overlapping peaks, the main peaks are the frameshifted *bla*, the second peaks are the  
19 repaired *bla*; *Bottom* : in the final fast-growing subcultures, sequencing diagrams contains very few  
20 overlapping peaks.

21 (C) The ClustalW alignment of the wild-type, frameshifted and repaired *bla* gene sequences: ***bla*+**:  
22 wild-type; *bla*- : frameshift; *bla*\**A-E* : different (independent) revertants; *box* : the base G deleted in  
23 the OE-PCR; *underlined* : the bases (in blue) inserted or deleted in the revertants; *circles* : base  
24 substitutions (G:C $\leftrightarrow$ A:T transitions).

25 (D) The codon and amino acid unified alignment of *bla* and their translated protein sequences:  
26 *underlined* : the base G deleted in codon 46; *red box* : stop codons; *red star* : stop signals.

27 **Fig 3. The traditional model for frameshift repair: *random mutagenesis*:** *Step 1* : a frameshift  
28 mutation occurs in a coding gene, many hidden stop codons (*red bars*) emerge in the CDS, and in  
29 the nonsense mRNAs, cause *translational termination* and resulted in truncated products; *Step 2* :  
30 the coding gene is repaired by a *reverse mutation* through random mutagenesis, the reading frame  
31 is restored immediately, stop codons are hidden (*green bars*), and translation proceeds, producing  
32 functional mRNAs and proteins, which are identical and same to the original genes and proteins.

33 **Fig 4. NGS resequencing and variation analysis the genomes of the frameshift/revertant:**

34 (A) The genome-wide variation map of the frameshift /revertant: to visualize the levels of read  
35 coverages and the distribution of mutations, Circos software was used to show the clean reads of  
36 each sample, the depth of coverage (number of clean reads covering a given base position of the  
37 reference sequence), and the SNP/indel, using the reference genome sequence as a ruler. The  
38 outermost circle: the coordinate position of the reference genome, and then, outside-in, the  
39 distribution of indel/SNPs (red dots), the depth of coverage (grey), the GC content (green) and the  
40 GC skew value (pink) in the reference genome, respectively. There are two samples, the frameshift



1 (*bla*-) and the revertant (*bla*\*), so there are two sets of indel/SNP, and reads coverage depth  
2 mapped onto the reference genome sequences.

3 (B) The distribution of the numbers of SNPs/indels of the frameshift/revertant on the reference  
4 genome: The abscissa axis shows the chromosome coordination of the reference genome sequence,  
5 and the ordinate axis represents the SNP/indel density on the genome sequence in per 10 kb. The  
6 left scale: SNP (red peaks); the right scale: indel (blue peaks). See Table 2 for data.

7 (C) The types and lengths of the reported “structure variations” of the frameshift/revertant: The  
8 horizontal axis represents the range of SV lengths, and the vertical axis represents the number of  
9 SVs. See Table 3 for data.

10 **Fig 5. Expression of the PTC-free frameshifted *bla* in *E. coli* BL21:**

11 (A) SDS-PAGE of the lysates of pET28a-*bla*# recombinant *E. coli* cells; Lane 1: protein marker;  
12 Lane 2 and 3: whole-cell lysates of uninduced and induced cells; lane 4 and 5: the supernatant of  
13 uninduced and induced cells; lane 6 and 7: the precipitate of uninduced and induced cells;

14 (B) Detection of  $\beta$ -lactamase activity by iodimetry: (1) the revertants of *E. coli* BL21/pET28a-*bla*-  
15 caused the fading of the iodine/starch solution, suggesting that their *bla*- was repaired, produced  
16 active  $\beta$ -lactamases, and transformed ampicillin into penicillium thiazole acid, which bind with  
17 starch and competitively inhibit the binding of iodine to starch; (2) *E. coli* BL21/pET28a-*bla*# did  
18 not cause fading, suggesting that it was not repaired but expressed a frameshifted BLA (BLA#),  
19 which is an inactive product; (3) the negative control (*E. coli* BL21), no  $\beta$ -lactamase, no fading.

20 **Fig 6. The transcriptome analysis of different *E. coli* strains:** *W-1*: wildtype; *FS-2*: frameshift;

21 *R-3*: a revertant; *RE-4*: a subculture of the revertant; (A) The number of differentially expressed  
22 genes (DEGs) and the cluster analysis of DEGs; (B) the most enriched GO terms by comparing  
23 the frameshift (*FS\_2*) with the wild type (*W\_1*); (C) the most enriched GO terms by comparing  
24 the revertant (*R\_3*) with the frameshift (*FS\_2*); (D) DNA replication pathway; (E) genes  
25 upregulated in the RNA degradation/processing pathway; (F) genes upregulated in the mismatch  
26 repair and homologous recombination pathways. *Underlined* in B, C: GO terms involve in the  
27 processing of DNA or RNA, which probably also involve in frameshift repair; in D, E, F: *green*  
28 *box*: genes involve in the pathways; *red box*: genes upregulated in the frameshift or revertant.

29 **Fig 7. Targeted repair of the frameshift mutation induced by DNA or RNA oligonucleotides.**

30 (A) Both sense- and antisense-strand of DNA and RNA oligonucleotides can promote the repair of  
31 the frameshift mutation: *Control*: no oligo; *ssDNA*: sense-strand DNA; *asDNA*: antisense DNA;  
32 *dsDNA*: double-stranded DNA; *ssRNA*: sense-strand RNA; *asRNA*: antisense RNA; *dsRNA*:  
33 double-stranded RNA; each group were transformed with 10.0 nM of the corresponding oligo. (B)  
34 The statistical chart of the average recovery rates, which are the numbers of revertants found in  
35 each of the ampicillin plates divided by the numbers of colonies in the parallel tetracycline plates;  
36 (C) Sanger sequencing diagram of the DNA-induced revertants: *top*: induced by a wild-type  
37 ssDNA; *bottom*: induced by a mutant ssDNA with a C-to-A substitution; (D) Sanger sequencing  
38 diagram of the RNA-induced revertants: *top*: induced by a wild-type ssRNA; *bottom*: induced by a  
39 mutant ssRNA with a G-to-A substitution.

40 **Fig 8. The new model for frameshift repair: nonsense-mediated gene editing (NMGE):** *Step 1*:

41 when the frameshifted gene is transcribed and translated, the nonsense mRNAs containing many  
42 PTCs (*yellow bars*) are identified by mRNA surveillance through PTCs signaling; *Step 2*: some of  
43 the nonsense mRNAs causing *translational termination* are degraded by NMD; *Step 3*: some of  
44 the nonsense mRNAs are translated by translational frameshifting or readthrough; *Step 4*: some of

Premature termination codons signal frameshift repair

---

1 the nonsense mRNAs are repaired by *RNA editing*, PTCs are replaced by sense codons (*green bars*)  
2 through base insertion, deletion and substitution; *Step 5*: some of the original or repaired nonsense  
3 mRNAs are transported to identify and localize the defective coding gene; *Step 6*: the coding gene  
4 is repaired by *RNA-directed DNA repair*, the reading frame is restored partially, and the translation  
5 proceed, the remaining stop codons were readthrough, producing functional mRNAs and proteins  
6 with many variations, and so that the host recovered gradually.  
7  
8

Premature termination codons signal frameshift repair

1

2

Table 1. The natural suppressor tRNA for nonsense mutations (the *readthrough rules*).

| Site        | tRNA<br>(AA) | Wild type |           | Correction |           |
|-------------|--------------|-----------|-----------|------------|-----------|
|             |              | Code      | Anti-code | Code       | Anti-code |
| <i>supD</i> | Ser (S)      | → UCG     | CGA←      | → UAG      | CUA←      |
| <i>supE</i> | Gln (Q)      | → CAG     | CUG←      | → UAG      | CUA←      |
| <i>supF</i> | Tyr (Y)      | → UAC     | GUA←      | → UAG      | CUA←      |
| <i>supG</i> | Lys (K)      | → AAA     | UUU←      | → UAA      | UUA←      |
| <i>supU</i> | Trp (W)      | → UGG     | CCA←      | → UGA      | UCA←      |

3

4

5

Table 2. The summary of SNP/indel variations in the *bla\*<sup>-/-</sup>* genome

| Sample                 | Indels |     |       | SNPs |    |       |       |         |
|------------------------|--------|-----|-------|------|----|-------|-------|---------|
|                        | INS    | DEL | Total | ts   | tv | ts/tv | Total | Density |
| <i>bla<sup>-</sup></i> | 2      | 4   | 6     | 43   | 27 | 1.59  | 70    | 0.02/Kb |
| <i>bla<sup>*</sup></i> | 2      | 3   | 5     | 42   | 27 | 1.56  | 69    | 0.01/Kb |

10

11

Note: INS: insertion; DEL: deletion; ts: transitions; tv: transversions;

12

13

14

Table 3. The types and lengths of the “structure variations”

| Sample     | Total | Type |     |     | Length      |         |           |          |           |
|------------|-------|------|-----|-----|-------------|---------|-----------|----------|-----------|
|            |       | INS  | DEL | INV | 100-200     | 200-700 | 700-800   | 700-1000 | >=1000    |
| Frameshift | 77    | 65   | 10  | 2   | 70 (90.91%) | 0       | 2 (2.6%)  | 0        | 5 (6.49%) |
| Revertant  | 60    | 50   | 8   | 2   | 53 (88.33%) | 0       | 2 (3.33%) | 0        | 5 (8.33%) |

15

Note: INS: insertion; DEL: deletion; INV: inversion.

16

Premature termination codons signal frameshift repair

1

2 Table 4. Possible NMGE-relevant genes and pathways that were upregulated in the frameshift

| Pathway Term                    | Database | ID       | Input number | Background number | P-Value | Corrected P-Value |
|---------------------------------|----------|----------|--------------|-------------------|---------|-------------------|
| <i>ABC transporters</i>         | KEGG     | eco02010 | 32           | 171               | 0.0001  | 0.0090            |
| <i>RNA degradation</i>          | KEGG     | eco03018 | 1            | 15                | 0.7419  | 0.9762            |
| <i>DNA replication</i>          | KEGG     | eco03030 | 1            | 17                | 0.7822  | 0.9762            |
| <i>Mismatch repair</i>          | KEGG     | eco03430 | 1            | 22                | 0.8575  | 0.9796            |
| <i>Homologous recombination</i> | KEGG     | eco03440 | 1            | 27                | 0.9069  | 0.9796            |

3

4

5 Table 5. Possible NMGE-relevant genes and pathways that were upregulated in the revertant

| Pathway Term                    | Database | ID       | Input number | Background number | P-Value  | Corrected P-Value |
|---------------------------------|----------|----------|--------------|-------------------|----------|-------------------|
| <i>ABC transporters</i>         | KEGG     | eco02010 | 32           | 171               | 3.53E-05 | 0.0018            |
| <i>Homologous recombination</i> | KEGG     | eco03440 | 2            | 27                | 0.6539   | 0.9519            |
| <i>RNA degradation</i>          | KEGG     | eco03018 | 3            | 15                | 0.1017   | 0.5470            |
| <i>DNA replication</i>          | KEGG     | eco03030 | 1            | 17                | 0.7564   | 0.9519            |
| <i>Mismatch repair</i>          | KEGG     | eco03430 | 1            | 22                | 0.8357   | 0.9519            |

6

7

## References

1. Seligmann, H. and D.D. Pollock, *The ambush hypothesis: hidden stop codons prevent off-frame gene reading*. DNA Cell Biol, 2004. **23**(10): p. 701-5.
2. Owens, M., et al., *SOS1 frameshift mutations cause pure mucosal neuroma syndrome, a clinical phenotype distinct from multiple endocrine neoplasia type 2B*. Clin Endocrinol (Oxf), 2016. **84**(5): p. 715-9.
3. Yan, S.E., et al., *In-depth analysis of hyaline fibromatosis syndrome frameshift mutations at the same site reveal the necessity of personalized therapy*. Hum Mutat, 2013. **34**(7): p. 1005-17.
4. Amiel, J., et al., *Polyalanine expansion and frameshift mutations of the paired-like homeobox gene PHOX2B in congenital central hypoventilation syndrome*. Nat Genet, 2003. **33**(4): p. 459-61.
5. Kang, S., et al., *GLI3 frameshift mutations cause autosomal dominant Pallister-Hall syndrome*. Nat Genet, 1997. **15**(3): p. 266-8.
6. Jensen, N.M., et al., *An update on targeted gene repair in mammalian cells: methods and mechanisms*. J Biomed Sci, 2011. **18**: p. 10.
7. Streisinger, G., et al., *Frameshift mutations and the genetic code. This paper is dedicated to Professor Theodosius Dobzhansky on the occasion of his 66th birthday*. Cold Spring Harb Symp Quant Biol, 1966. **31**: p. 77-84.
8. Li, H., et al., *The Sequence Alignment/Map format and SAMtools*. Bioinformatics, 2009. **25**(16): p. 2078-9.
9. DePristo, M.A., et al., *A framework for variation discovery and genotyping using next-generation DNA sequencing data*. Nat Genet, 2011. **43**(5): p. 491-8.
10. Krzywinski, M., et al., *Circos: an information aesthetic for comparative genomics*. Genome Res, 2009. **19**(9): p. 1639-45.
11. Fan, X., et al., *BreakDancer: Identification of Genomic Structural Variation from Paired-End Read Mapping*. Curr Protoc Bioinformatics, 2014. **45**: p. 15 6 1-11.
12. Chen, K., et al., *BreakDancer: an algorithm for high-resolution mapping of genomic structural variation*. Nat Methods, 2009. **6**(9): p. 677-81.
13. Langmead, B., *Aligning short sequencing reads with Bowtie*. Curr Protoc Bioinformatics, 2010. **Chapter 11**: p. Unit 11 7.
14. Anders, S., P.T. Pyl, and W. Huber, *HTSeq—a Python framework to work with high-throughput sequencing data*. Bioinformatics, 2015. **31**(2): p. 166-9.
15. Robinson, M.D., D.J. McCarthy, and G.K. Smyth, *edgeR: a Bioconductor package for differential expression analysis of digital gene expression data*. Bioinformatics, 2010. **26**(1): p. 139-40.
16. Wang, L., et al., *DEGseq: an R package for identifying differentially expressed genes from RNA-seq data*. Bioinformatics, 2010. **26**(1): p. 136-8.
17. Young, M.D., et al., *Gene ontology analysis for RNA-seq: accounting for selection bias*. Genome Biol, 2010. **11**(2): p. R14.
18. Xie, C., et al., *KOBAS 2.0: a web server for annotation and identification of enriched pathways and diseases*. Nucleic Acids Res, 2011. **39**(Web Server issue): p. W316-22.

- 1            19. Lee, H., et al., *Rate and molecular spectrum of spontaneous mutations in the*  
2            *bacterium Escherichia coli as determined by whole-genome sequencing.* Proc Natl Acad Sci U  
3            S A, 2012. **109**(41): p. E2774-83.
- 4            20. Wang, X. and C. Yang, *CAUSA 2.0: accurate and consistent evolutionary analysis of*  
5            *proteins using codon and amino acid unified sequence alignments.* PeerJ PrePrints **3**.
- 6            21. Schaaper, R.M., *Mechanisms of mutagenesis in the Escherichia coli mutator*  
7            *mutD5: role of DNA mismatch repair.* Proc Natl Acad Sci U S A, 1988. **85**(21): p. 8126-30.
- 8            22. Roberts, R.J., M.O. Carneiro, and M.C. Schatz, *The advantages of SMRT*  
9            *sequencing.* Genome Biol, 2013. **14**(7): p. 405.
- 10           23. Itoh, Y., S. Sekine, and S. Yokoyama, *Crystal structure of the full-length bacterial*  
11           *selenocysteine-specific elongation factor SelB.* Nucleic Acids Res, 2015. **43**(18): p. 9028-38.
- 12           24. Baron, C. and A. Bock, *The length of the aminoacyl-acceptor stem of the*  
13           *selenocysteine-specific tRNA(Sec) of Escherichia coli is the determinant for binding to*  
14           *elongation factors SELB or Tu.* J Biol Chem, 1991. **266**(30): p. 20375-9.
- 15           25. Ireton, G.C., et al., *The structure of Escherichia coli cytosine deaminase.* J Mol Biol,  
16           2002. **315**(4): p. 687-97.
- 17           26. Danielsen, S., et al., *Characterization of the Escherichia coli codBA operon*  
18           *encoding cytosine permease and cytosine deaminase.* Mol Microbiol, 1992. **6**(10): p. 1335-44.
- 19           27. MacGinnitie, A.J., S. Anant, and N.O. Davidson, *Mutagenesis of apobec-1, the*  
20           *catalytic subunit of the mammalian apolipoprotein B mRNA editing enzyme, reveals distinct*  
21           *domains that mediate cytosine nucleoside deaminase, RNA binding, and RNA editing activity.*  
22           J Biol Chem, 1995. **270**(24): p. 14768-75.
- 23           28. Vita, A., et al., *Cytidine deaminase from Escherichia coli B. Purification and*  
24           *enzymatic and molecular properties.* Biochemistry, 1985. **24**(21): p. 6020-4.
- 25           29. Ashley, G.W. and P.A. Bartlett, *Purification and properties of cytidine deaminase*  
26           *from escherichia coli.* J Biol Chem, 1984. **259**(21): p. 13615-20.
- 27           30. von Dippe, P.J., et al., *Deoxycytidine transport in the presence of a cytidine*  
28           *deaminase inhibitor and the transport of uracil in Escherichia coli B.* J Biol Chem, 1975.  
29           **250**(10): p. 3666-71.
- 30           31. Hosono, H. and S. Kuno, *The purification and properties of cytidine deaminase*  
31           *from Escherichia coli.* J Biochem, 1973. **74**(4): p. 797-803.
- 32           32. Cohen, R.M. and R. Wolfenden, *Cytidine deaminase from Escherichia coli.*  
33           *Purification, properties and inhibition by the potential transition state analog*  
34           *3,4,5,6-tetrahydrouridine.* J Biol Chem, 1971. **246**(24): p. 7561-5.
- 35           33. Ashley, G.W. and P.A. Bartlett, *Inhibition of Escherichia coli cytidine deaminase by*  
36           *a phosphapyrimidine nucleoside.* J Biol Chem, 1984. **259**(21): p. 13621-7.
- 37           34. Navaratnam, N., et al., *Escherichia coli cytidine deaminase provides a molecular*  
38           *model for ApoB RNA editing and a mechanism for RNA substrate recognition.* J Mol Biol, 1998.  
39           **275**(4): p. 695-714.
- 40           35. Navaratnam, N., et al., *Evolutionary origins of apoB mRNA editing: catalysis by a*  
41           *cytidine deaminase that has acquired a novel RNA-binding motif at its active site.* Cell, 1995.  
42           **81**(2): p. 187-95.
- 43           36. Nygaard, P., *Adenosine deaminase from Escherichia coli.* Methods Enzymol, 1978.  
44           **51**: p. 508-12.

- 1           37. Koch, A.L. and G. Vallee, *The properties of adenosine deaminase and adenosine*  
2           *nucleoside phosphorylase in extracts of Escherichia coli*. J Biol Chem, 1959. **234**(5): p. 1213-8.
- 3           38. Remy, C.N. and S.H. Love, *Induction of adenosine deaminase in Escherichia coli*. J  
4           Bacteriol, 1968. **96**(1): p. 76-85.
- 5           39. Kim, U., et al., *Molecular cloning of cDNA for double-stranded RNA adenosine*  
6           *deaminase, a candidate enzyme for nuclear RNA editing*. Proc Natl Acad Sci U S A, 1994.  
7           **91**(24): p. 11457-61.
- 8           40. Kim, U. and K. Nishikura, *Double-stranded RNA adenosine deaminase as a*  
9           *potential mammalian RNA editing factor*. Semin Cell Biol, 1993. **4**(4): p. 285-93.
- 10          41. Oakes, E., et al., *Adenosine Deaminase That Acts on RNA 3 (ADAR3) Binding to*  
11          *Glutamate Receptor Subunit B Pre-mRNA Inhibits RNA Editing in Glioblastoma*. J Biol Chem,  
12          2017. **292**(10): p. 4326-4335.
- 13          42. Ward, S.V., et al., *RNA editing enzyme adenosine deaminase is a restriction factor*  
14          *for controlling measles virus replication that also is required for embryogenesis*. Proc Natl  
15          Acad Sci U S A, 2011. **108**(1): p. 331-6.
- 16          43. Herbert, A., et al., *A Z-DNA binding domain present in the human editing enzyme,*  
17          *double-stranded RNA adenosine deaminase*. Proc Natl Acad Sci U S A, 1997. **94**(16): p.  
18          8421-6.
- 19          44. Yang, J.H., et al., *Purification and characterization of a human RNA adenosine*  
20          *deaminase for glutamate receptor B pre-mRNA editing*. Proc Natl Acad Sci U S A, 1997. **94**(9):  
21          p. 4354-9.
- 22          45. Maas, S., et al., *Structural requirements for RNA editing in glutamate receptor*  
23          *pre-mRNAs by recombinant double-stranded RNA adenosine deaminase*. J Biol Chem, 1996.  
24          **271**(21): p. 12221-6.
- 25          46. Polson, A.G., B.L. Bass, and J.L. Casey, *RNA editing of hepatitis delta virus*  
26          *antigenome by dsRNA-adenosine deaminase*. Nature, 1996. **380**(6573): p. 454-6.
- 27          47. Dabiri, G.A., et al., *Editing of the GLuR-B ion channel RNA in vitro by recombinant*  
28          *double-stranded RNA adenosine deaminase*. EMBO J, 1996. **15**(1): p. 34-45.
- 29          48. Hurst, S.R., et al., *Deamination of mammalian glutamate receptor RNA by*  
30          *Xenopus dsRNA adenosine deaminase: similarities to in vivo RNA editing*. RNA, 1995. **1**(10): p.  
31          1051-60.
- 32          49. Wang, Y., et al., *Genomic organization and chromosomal location of the human*  
33          *dsRNA adenosine deaminase gene: the enzyme for glutamate-activated ion channel RNA*  
34          *editing*. J Mol Biol, 1995. **254**(2): p. 184-95.
- 35          50. Chen, Z., A. Hirano, and T.C. Wong, *Isolation and characterization of intranuclear*  
36          *ribonucleoprotein complexes associated with double-stranded RNA adenosine deaminase*  
37          *from brain cells: implications for RNA-editing and hypermutation of viral RNA in the CNS*. J  
38          Neurovirol, 1995. **1**(3-4): p. 295-306.
- 39          51. Lai, F., R. Drakas, and K. Nishikura, *Mutagenic analysis of double-stranded RNA*  
40          *adenosine deaminase, a candidate enzyme for RNA editing of glutamate-gated ion channel*  
41          *transcripts*. J Biol Chem, 1995. **270**(29): p. 17098-105.
- 42          52. Gerber, A., et al., *Tad1p, a yeast tRNA-specific adenosine deaminase, is related to*  
43          *the mammalian pre-mRNA editing enzymes ADAR1 and ADAR2*. EMBO J, 1998. **17**(16): p.  
44          4780-9.

- 1           53.    Wolf, J., A.P. Gerber, and W. Keller, *tadA*, an essential tRNA-specific adenosine  
2           *deaminase from Escherichia coli*. EMBO J, 2002. **21**(14): p. 3841-51.
- 3           54.    Losey, H.C., A.J. Ruthenburg, and G.L. Verdine, *Crystal structure of Staphylococcus*  
4           *aureus tRNA adenosine deaminase Tada in complex with RNA*. Nat Struct Mol Biol, 2006.  
5           **13**(2): p. 153-9.
- 6           55.    Kuratani, M., et al., *Crystal structure of tRNA adenosine deaminase (TadA) from*  
7           *Aquifex aeolicus*. J Biol Chem, 2005. **280**(16): p. 16002-8.
- 8           56.    Lee, W.H., et al., *Crystal structure of the tRNA-specific adenosine deaminase from*  
9           *Streptococcus pyogenes*. Proteins, 2007. **68**(4): p. 1016-9.
- 10          57.    Maas, S., A.P. Gerber, and A. Rich, *Identification and characterization of a human*  
11          *tRNA-specific adenosine deaminase related to the ADAR family of pre-mRNA editing enzymes*.  
12          Proc Natl Acad Sci U S A, 1999. **96**(16): p. 8895-900.
- 13          58.    Maas, S., Y.G. Kim, and A. Rich, *Sequence, genomic organization and functional*  
14          *expression of the murine tRNA-specific adenosine deaminase ADAT1*. Gene, 2000. **243**(1-2): p.  
15          59-66.
- 16          59.    Keegan, L.P., et al., *The properties of a tRNA-specific adenosine deaminase from*  
17          *Drosophila melanogaster support an evolutionary link between pre-mRNA editing and tRNA*  
18          *modification*. Mol Cell Biol, 2000. **20**(3): p. 825-33.
- 19          60.    Kuraoka, I., *Diversity of Endonuclease V: From DNA Repair to RNA Editing*.  
20          Biomolecules, 2015. **5**(4): p. 2194-206.
- 21          61.    de Semir, D. and J.M. Aran, *Targeted gene repair: the ups and downs of a*  
22          *promising gene therapy approach*. Curr Gene Ther, 2006. **6**(4): p. 481-504.
- 23          62.    Parekh-Olmedo, H., et al., *Gene therapy progress and prospects: targeted gene*  
24          *repair*. Gene Ther, 2005. **12**(8): p. 639-46.
- 25          63.    Dekker, M., C. Brouwers, and H. te Riele, *Targeted gene modification in*  
26          *mismatch-repair-deficient embryonic stem cells by single-stranded DNA oligonucleotides*.  
27          Nucleic Acids Res, 2003. **31**(6): p. e27.
- 28          64.    Liu, L., et al., *Strand bias in targeted gene repair is influenced by transcriptional*  
29          *activity*. Mol Cell Biol, 2002. **22**(11): p. 3852-63.
- 30          65.    Trott, D.A. and A.C. Porter, *Hypothesis: transcript-templated repair of DNA*  
31          *double-strand breaks*. Bioessays, 2006. **28**(1): p. 78-83.
- 32          66.    Keskin, H., C. Meers, and F. Storici, *Transcript RNA supports precise repair of its*  
33          *own DNA gene*. RNA Biol, 2016. **13**(2): p. 157-65.
- 34          67.    Keskin, H., et al., *Transcript-RNA-templated DNA recombination and repair*.  
35          Nature, 2014. **515**(7527): p. 436-9.
- 36          68.    Wei, L., et al., *DNA damage during the G0/G1 phase triggers RNA-templated,*  
37          *Cockayne syndrome B-dependent homologous recombination*. Proc Natl Acad Sci U S A, 2015.  
38          **112**(27): p. E3495-504.
- 39          69.    Storici, F., *RNA-mediated DNA modifications and RNA-templated DNA repair*. Curr  
40          Opin Mol Ther, 2008. **10**(3): p. 224-30.
- 41          70.    Storici, F., et al., *RNA-templated DNA repair*. Nature, 2007. **447**(7142): p. 338-41.
- 42          71.    Ge, Z., et al., *Polypyrimidine tract binding protein 1 protects mRNAs from*  
43          *recognition by the nonsense-mediated mRNA decay pathway*. Elife, 2016. **5**.



- 1           72. Schweingruber, C., et al., *Nonsense-mediated mRNA decay - mechanisms of*  
2 *substrate mRNA recognition and degradation in mammalian cells.* Biochim Biophys Acta,  
3 2013. **1829**(6-7): p. 612-23.
- 4           73. Niu, D.K. and J.L. Cao, *Nucleosome deposition and DNA methylation may*  
5 *participate in the recognition of premature termination codon in nonsense-mediated mRNA*  
6 *decay.* FEBS Lett, 2010. **584**(16): p. 3509-12.
- 7           74. Muhlemann, O., et al., *Recognition and elimination of nonsense mRNA.* Biochim  
8 Biophys Acta, 2008. **1779**(9): p. 538-49.
- 9           75. Muhlemann, O., *Recognition of nonsense mRNA: towards a unified model.*  
10 Biochem Soc Trans, 2008. **36**(Pt 3): p. 497-501.
- 11          76. Muhlrad, D. and R. Parker, *Recognition of yeast mRNAs as "nonsense containing"*  
12 *leads to both inhibition of mRNA translation and mRNA degradation: implications for the*  
13 *control of mRNA decapping.* Mol Biol Cell, 1999. **10**(11): p. 3971-8.
- 14          77. Zhang, J. and L.E. Maquat, *Evidence that the decay of nucleus-associated*  
15 *nonsense mRNA for human triosephosphate isomerase involves nonsense codon recognition*  
16 *after splicing.* RNA, 1996. **2**(3): p. 235-43.
- 17          78. Fujikura, K., *Premature termination codons in modern human genomes.* Sci Rep,  
18 2016. **6**: p. 22468.
- 19          79. Wong, T.Y., et al., *Role of premature stop codons in bacterial evolution.* J Bacteriol,  
20 2008. **190**(20): p. 6718-25.
- 21          80. Cirulli, E.T., et al., *A whole-genome analysis of premature termination codons.*  
22 Genomics, 2011. **98**(5): p. 337-42.
- 23          81. Hwang, J. and Y.K. Kim, *When a ribosome encounters a premature termination*  
24 *codon.* BMB Rep, 2013. **46**(1): p. 9-16.
- 25          82. Son, H.G., et al., *RNA surveillance via nonsense-mediated mRNA decay is crucial*  
26 *for longevity in daf-2/insulin/IGF-1 mutant C. elegans.* Nat Commun, 2017. **8**: p. 14749.
- 27          83. Fang, Y., et al., *Nonsense-mediated mRNA decay of collagen -emerging complexity*  
28 *in RNA surveillance mechanisms.* J Cell Sci, 2013. **126**(Pt 12): p. 2551-60.
- 29          84. Behm-Ansmant, I. and E. Izaurralde, *Quality control of gene expression: a*  
30 *stepwise assembly pathway for the surveillance complex that triggers nonsense-mediated*  
31 *mRNA decay.* Genes Dev, 2006. **20**(4): p. 391-8.
- 32          85. Wilusz, C.J., W. Wang, and S.W. Peltz, *Curbing the nonsense: the activation and*  
33 *regulation of mRNA surveillance.* Genes Dev, 2001. **15**(21): p. 2781-5.
- 34          86. Le Hir, H., et al., *The exon-exon junction complex provides a binding platform for*  
35 *factors involved in mRNA export and nonsense-mediated mRNA decay.* EMBO J, 2001. **20**(17):  
36 p. 4987-97.
- 37          87. Gonzalez, C.I., W. Wang, and S.W. Peltz, *Nonsense-mediated mRNA decay in*  
38 *Saccharomyces cerevisiae: a quality control mechanism that degrades transcripts harboring*  
39 *premature termination codons.* Cold Spring Harb Symp Quant Biol, 2001. **66**: p. 321-8.
- 40          88. Zhang, J. and L.E. Maquat, *Evidence that translation reinitiation abrogates*  
41 *nonsense-mediated mRNA decay in mammalian cells.* EMBO J, 1997. **16**(4): p. 826-33.
- 42          89. Richards, J., et al., *Quality control of bacterial mRNA decoding and decay.* Biochim  
43 Biophys Acta, 2008. **1779**(9): p. 574-82.

- 1           90. Xu, J., R.W. Hendrix, and R.L. Duda, *Conserved translational frameshift in dsDNA*  
2 *bacteriophage tail assembly genes*. *Molecular Cell*, 2004. **16**(1): p. 11-21.
- 3           91. Baykal, U., A.L. Moyne, and S. Tuzun, *A frameshift in the coding region of a novel*  
4 *tomato class I basic chitinase gene makes it a pseudogene with a functional*  
5 *wound-responsive promoter*. *Gene*, 2006. **376**(1): p. 37-46.
- 6           92. Chen, J., et al., *Dynamic pathways of -1 translational frameshifting*. *Nature*, 2014.  
7 **512**(7514): p. 328-32.
- 8           93. Gaudin, C., et al., *Structure of the RNA signal essential for translational*  
9 *frameshifting in HIV-1*. *J Mol Biol*, 2005. **349**(5): p. 1024-35.
- 10          94. Bekaert, M., et al., *Identification of programmed translational -1 frameshifting*  
11 *sites in the genome of Saccharomyces cerevisiae*. *Genome Res*, 2005. **15**(10): p. 1411-20.
- 12          95. Licznar, P., et al., *Programmed translational -1 frameshifting on hexanucleotide*  
13 *motifs and the wobble properties of tRNAs*. *EMBO J*, 2003. **22**(18): p. 4770-8.
- 14          96. Klobutcher, L.A. and P.J. Farabaugh, *Shifty ciliates: frequent programmed*  
15 *translational frameshifting in euplotids*. *Cell*, 2002. **111**(6): p. 763-6.
- 16          97. Advani, V.M., A.T. Belew, and J.D. Dinman, *Yeast telomere maintenance is globally*  
17 *controlled by programmed ribosomal frameshifting and the nonsense-mediated mRNA decay*  
18 *pathway*. *Translation (Austin)*, 2013. **1**(1): p. e24418.
- 19          98. Claisse, M.L., M. Boguta, and W. Zagorski, *Translational readthrough of a*  
20 *termination codon in the yeast mitochondrial mRNA VAR1 as a result of mutation in the*  
21 *release factor mRF1*. *Acta Biochim Pol*, 2005. **52**(1): p. 129-37.
- 22          99. Halvey, P.J., D.C. Liebler, and R.J. Slebos, *A Reporter System for Translational*  
23 *Readthrough of Stop Codons in Human Cells*. *FEBS Open Bio*, 2012. **2**: p. 56-59.
- 24          100. Eswarappa, S.M., et al., *Programmed translational readthrough generates*  
25 *antiangiogenic VEGF-Ax*. *Cell*, 2014. **157**(7): p. 1605-18.
- 26          101. Staff, P.G., *Correction: Functional Translational Readthrough: A Systems Biology*  
27 *Perspective*. *PLoS Genet*, 2016. **12**(11): p. e1006434.
- 28          102. Wang, X., et al., *Why are frameshift homologs widespread within and across*  
29 *species?* bioRxiv, 2016.
- 30          103. Yang, H., et al., *Expression profile and gene age jointly shaped the genome-wide*  
31 *distribution of premature termination codons in a Drosophila melanogaster population*. *Mol*  
32 *Biol Evol*, 2015. **32**(1): p. 216-28.
- 33          104. Scofield, D.G., X. Hong, and M. Lynch, *Position of the final intron in full-length*  
34 *transcripts: determined by NMD?* *Mol Biol Evol*, 2007. **24**(4): p. 896-9.
- 35          105. Isken, O., et al., *Upf1 phosphorylation triggers translational repression during*  
36 *nonsense-mediated mRNA decay*. *Cell*, 2008. **133**(2): p. 314-27.
- 37          106. Ward, A.J., et al., *Nonsense-mediated decay as a terminating mechanism for*  
38 *antisense oligonucleotides*. *Nucleic Acids Res*, 2014. **42**(9): p. 5871-9.
- 39          107. Lewis, B.P., R.E. Green, and S.E. Brenner, *Evidence for the widespread coupling of*  
40 *alternative splicing and nonsense-mediated mRNA decay in humans*. *Proc Natl Acad Sci U S A*,  
41 2003. **100**(1): p. 189-92.
- 42          108. He, F., A.H. Brown, and A. Jacobson, *Upf1p, Nmd2p, and Upf3p are interacting*  
43 *components of the yeast nonsense-mediated mRNA decay pathway*. *Mol Cell Biol*, 1997. **17**(3):  
44 p. 1580-94.

- 1 109. Namy, O., et al., *A mechanical explanation of RNA pseudoknot function in*  
2 *programmed ribosomal frameshifting*. *Nature*, 2006. **441**(7090): p. 244-7.
- 3 110. Dinman, J.D., *Control of gene expression by translational recoding*. *Adv Protein*  
4 *Chem Struct Biol*, 2012. **86**: p. 129-49.
- 5 111. Dinman, J.D., *Mechanisms and implications of programmed translational*  
6 *frameshifting*. *Wiley Interdiscip Rev RNA*, 2012. **3**(5): p. 661-73.
- 7 112. Ketteler, R., *On programmed ribosomal frameshifting: the alternative proteomes*.  
8 *Front Genet*, 2012. **3**: p. 242.
- 9 113. Kopelowitz, J., et al., *Influence of codon context on UGA suppression and*  
10 *readthrough*. *J Mol Biol*, 1992. **225**(2): p. 261-9.
- 11 114. Weiss, R.B., *Ribosomal frameshifting, jumping and readthrough*. *Curr Opin Cell*  
12 *Biol*, 1991. **3**(6): p. 1051-5.
- 13 115. Engelberg-Kulka, H., L. Dekel, and M. Israeli-Reches, *Regulation of the escherichia*  
14 *coli tryptophan operon by readthrough of UGA termination codons*. *Biochem Biophys Res*  
15 *Commun*, 1981. **98**(4): p. 1008-15.
- 16 116. Seidman, J.S., B.D. Janssen, and C.S. Hayes, *Alternative fates of paused ribosomes*  
17 *during translation termination*. *J Biol Chem*, 2011. **286**(36): p. 31105-12.
- 18 117. Su, D., Y. Li, and V.N. Gladyshev, *Selenocysteine insertion directed by the 3'-UTR*  
19 *SECIS element in Escherichia coli*. *Nucleic Acids Res*, 2005. **33**(8): p. 2486-92.
- 20 118. Leeds, P., et al., *Gene products that promote mRNA turnover in Saccharomyces*  
21 *cerevisiae*. *Mol Cell Biol*, 1992. **12**(5): p. 2165-77.
- 22 119. Kashima, I., et al., *Binding of a novel SMG-1-Upf1-eRF1-eRF3 complex (SURF) to*  
23 *the exon junction complex triggers Upf1 phosphorylation and nonsense-mediated mRNA*  
24 *decay*. *Genes Dev*, 2006. **20**(3): p. 355-67.
- 25 120. Keeling, K.M., et al., *Leaky termination at premature stop codons antagonizes*  
26 *nonsense-mediated mRNA decay in S. cerevisiae*. *RNA*, 2004. **10**(4): p. 691-703.
- 27 121. Isken, O. and L.E. Maquat, *Quality control of eukaryotic mRNA: safeguarding cells*  
28 *from abnormal mRNA function*. *Genes Dev*, 2007. **21**(15): p. 1833-56.
- 29 122. Vohhodina, J., D.P. Harkin, and K.I. Savage, *Dual roles of DNA repair enzymes in*  
30 *RNA biology/post-transcriptional control*. *Wiley Interdiscip Rev RNA*, 2016.
- 31 123. Nakielny, S. and G. Dreyfuss, *Transport of proteins and RNAs in and out of the*  
32 *nucleus*. *Cell*, 1999. **99**(7): p. 677-90.
- 33 124. Shen, Y., et al., *RNA-driven genetic changes in bacteria and in human cells*. *Mutat*  
34 *Res*, 2011. **717**(1-2): p. 91-8.
- 35 125. Thaler, D.S., G. Tomblin, and K. Zahn, *Short-patch reverse transcription in*  
36 *Escherichia coli*. *Genetics*, 1995. **140**(3): p. 909-15.
- 37 126. Kugita, M., et al., *RNA editing in hornwort chloroplasts makes more than half the*  
38 *genes functional*. *Nucleic Acids Res*, 2003. **31**(9): p. 2417-23.
- 39 127. Bock, R., *Sense from nonsense: how the genetic information of chloroplasts is*  
40 *altered by RNA editing*. *Biochimie*, 2000. **82**(6-7): p. 549-57.
- 41 128. Horvath, A., E.A. Berry, and D.A. Maslov, *Translation of the edited mRNA for*  
42 *cytochrome b in trypanosome mitochondria*. *Science*, 2000. **287**(5458): p. 1639-40.

- 1            129. Yoshinaga, K., et al., *Extensive RNA editing and possible double-stranded*  
2 *structures determining editing sites in the atpB transcripts of hornwort chloroplasts.* Nucleic  
3 *Acids Res*, 1997. **25**(23): p. 4830-4.
- 4            130. Sloof, P., et al., *RNA editing in mitochondria of cultured trypanosomatids:*  
5 *translatable mRNAs for NADH-dehydrogenase subunits are missing.* *J Bioenerg Biomembr*,  
6 1994. **26**(2): p. 193-203.
- 7            131. Simpson, L. and J. Shaw, *RNA editing and the mitochondrial cryptogenes of*  
8 *kinetoplastid protozoa.* *Cell*, 1989. **57**(3): p. 355-66.
- 9            132. Alfonzo, J.D., O. Thiemann, and L. Simpson, *The mechanism of U*  
10 *insertion/deletion RNA editing in kinetoplastid mitochondria.* *Nucleic Acids Res*, 1997. **25**(19):  
11 p. 3751-9.
- 12            133. Takenaka, M., et al., *RNA editing in plants and its evolution.* *Annu Rev Genet*,  
13 2013. **47**: p. 335-52.
- 14            134. Graves, P.V., et al., *Direct protein sequencing of wheat mitochondrial ATP synthase*  
15 *subunit 9 confirms RNA editing in plants.* *J Mol Biol*, 1990. **214**(1): p. 1-6.
- 16            135. Slavov, D., M. Clark, and K. Gardiner, *Comparative analysis of the RED1 and RED2*  
17 *A-to-I RNA editing genes from mammals, pufferfish and zebrafish.* *Gene*, 2000. **250**(1-2): p.  
18 41-51.
- 19            136. Zougman, A., et al., *Evidence for insertional RNA editing in humans.* *Curr Biol*,  
20 2008. **18**(22): p. 1760-5.
- 21            137. Athanasiadis, A., A. Rich, and S. Maas, *Widespread A-to-I RNA editing of*  
22 *Alu-containing mRNAs in the human transcriptome.* *PLoS Biol*, 2004. **2**(12): p. e391.
- 23            138. Wang, Y., et al., *Systematic characterization of A-to-I RNA editing hotspots in*  
24 *microRNAs across human cancers.* *Genome Res*, 2017.
- 25            139. Picardi, E., D.S. Horner, and G. Pesole, *Single cell transcriptomics reveals specific*  
26 *RNA editing signatures in the human brain.* *RNA*, 2017.
- 27            140. Xu, G. and J. Zhang, *Human coding RNA editing is generally nonadaptive.* *Proc*  
28 *Natl Acad Sci U S A*, 2014. **111**(10): p. 3769-74.
- 29            141. Bazak, L., et al., *A-to-I RNA editing occurs at over a hundred million genomic sites,*  
30 *located in a majority of human genes.* *Genome Res*, 2014. **24**(3): p. 365-76.
- 31            142. Shtrichman, R., et al., *Altered A-to-I RNA editing in human embryogenesis.* *PLoS*  
32 *One*, 2012. **7**(7): p. e41576.
- 33            143. Bahn, J.H., et al., *Accurate identification of A-to-I RNA editing in human by*  
34 *transcriptome sequencing.* *Genome Res*, 2012. **22**(1): p. 142-50.
- 35            144. Amariglio, N. and G. Rechavi, *A-to-I RNA editing: a new regulatory mechanism of*  
36 *global gene expression.* *Blood Cells Mol Dis*, 2007. **39**(2): p. 151-5.
- 37            145. Silberberg, G., et al., *Deregulation of the A-to-I RNA editing mechanism in*  
38 *psychiatric disorders.* *Hum Mol Genet*, 2012. **21**(2): p. 311-21.
- 39            146. Terajima, H., et al., *ADARB1 catalyzes circadian A-to-I editing and regulates RNA*  
40 *rhythm.* *Nat Genet*, 2017. **49**(1): p. 146-151.
- 41            147. Valente, L. and K. Nishikura, *ADAR gene family and A-to-I RNA editing: diverse*  
42 *roles in posttranscriptional gene regulation.* *Prog Nucleic Acid Res Mol Biol*, 2005. **79**: p.  
43 299-338.

- 1            148. Blanc, V. and N.O. Davidson, *C-to-U RNA editing: mechanisms leading to genetic*  
2            *diversity*. J Biol Chem, 2003. **278**(3): p. 1395-8.
- 3            149. Bourara, K., S. Litvak, and A. Araya, *Generation of G-to-A and C-to-U changes in*  
4            *HIV-1 transcripts by RNA editing*. Science, 2000. **289**(5484): p. 1564-6.
- 5            150. Giege, P. and A. Brennicke, *RNA editing in Arabidopsis mitochondria effects 441 C*  
6            *to U changes in ORFs*. Proc Natl Acad Sci U S A, 1999. **96**(26): p. 15324-9.
- 7            151. Sharma, S., et al., *Transient overexpression of exogenous APOBEC3A causes*  
8            *C-to-U RNA editing of thousands of genes*. RNA Biol, 2016: p. 1-8.
- 9            152. Fossat, N., et al., *C to U RNA editing mediated by APOBEC1 requires RNA-binding*  
10            *protein RBM47*. EMBO Rep, 2014. **15**(8): p. 903-10.
- 11            153. Simpson, L., S. Sbicego, and R. Aphasizhev, *Uridine insertion/deletion RNA editing*  
12            *in trypanosome mitochondria: a complex business*. Rna, 2003. **9**(3): p. 265-76.
- 13            154. Kable, M.L., et al., *RNA editing: a mechanism for gRNA-specified uridylyate*  
14            *insertion into precursor mRNA*. Science, 1996. **273**(5279): p. 1189-95.
- 15            155. Ringpis, G.E., J. Stagno, and R. Aphasizhev, *Mechanism of U-insertion RNA editing*  
16            *in trypanosome mitochondria: characterization of RET2 functional domains by mutational*  
17            *analysis*. J Mol Biol, 2010. **399**(5): p. 696-706.
- 18            156. Chester, A., et al., *The apolipoprotein B mRNA editing complex performs a*  
19            *multifunctional cycle and suppresses nonsense-mediated decay*. EMBO J, 2003. **22**(15): p.  
20            3971-82.
- 21            157. Yu, W. and W. Schuster, *Evidence for a site-specific cytidine deamination reaction*  
22            *involved in C to U RNA editing of plant mitochondria*. J Biol Chem, 1995. **270**(31): p. 18227-33.
- 23            158. Blanc, V., S. Litvak, and A. Araya, *RNA editing in wheat mitochondria proceeds by*  
24            *a deamination mechanism*. FEBS Lett, 1995. **373**(1): p. 56-60.
- 25            159. Gerber, A.P. and W. Keller, *RNA editing by base deamination: more enzymes, more*  
26            *targets, new mysteries*. Trends Biochem Sci, 2001. **26**(6): p. 376-84.
- 27            160. Young, S.G., *Recent progress in understanding apolipoprotein B*. Circulation, 1990.  
28            **82**(5): p. 1574-94.
- 29            161. Anant, S. and N.O. Davidson, *Hydrolytic nucleoside and nucleotide deamination,*  
30            *and genetic instability: a possible link between RNA-editing enzymes and cancer?* Trends Mol  
31            Med, 2003. **9**(4): p. 147-52.
- 32            162. Shalem, O., et al., *Genome-scale CRISPR-Cas9 knockout screening in human cells*.  
33            Science, 2014. **343**(6166): p. 84-7.
- 34            163. Ran, F.A., et al., *Genome engineering using the CRISPR-Cas9 system*. Nat Protoc,  
35            2013. **8**(11): p. 2281-308.
- 36            164. Ran, F.A., et al., *Double nicking by RNA-guided CRISPR Cas9 for enhanced genome*  
37            *editing specificity*. Cell, 2013. **154**(6): p. 1380-9.
- 38            165. Paquet, D., et al., *Efficient introduction of specific homozygous and heterozygous*  
39            *mutations using CRISPR/Cas9*. Nature, 2016. **533**(7601): p. 125-9.
- 40            166. Zimmer, C.T., et al., *A CRISPR/Cas9 mediated point mutation in the alpha 6*  
41            *subunit of the nicotinic acetylcholine receptor confers resistance to spinosad in Drosophila*  
42            *melanogaster*. Insect Biochem Mol Biol, 2016. **73**: p. 62-9.
- 43

**Fig 1.** The frameshift mutagenesis of the *bla* gene in the plasmid pBR322

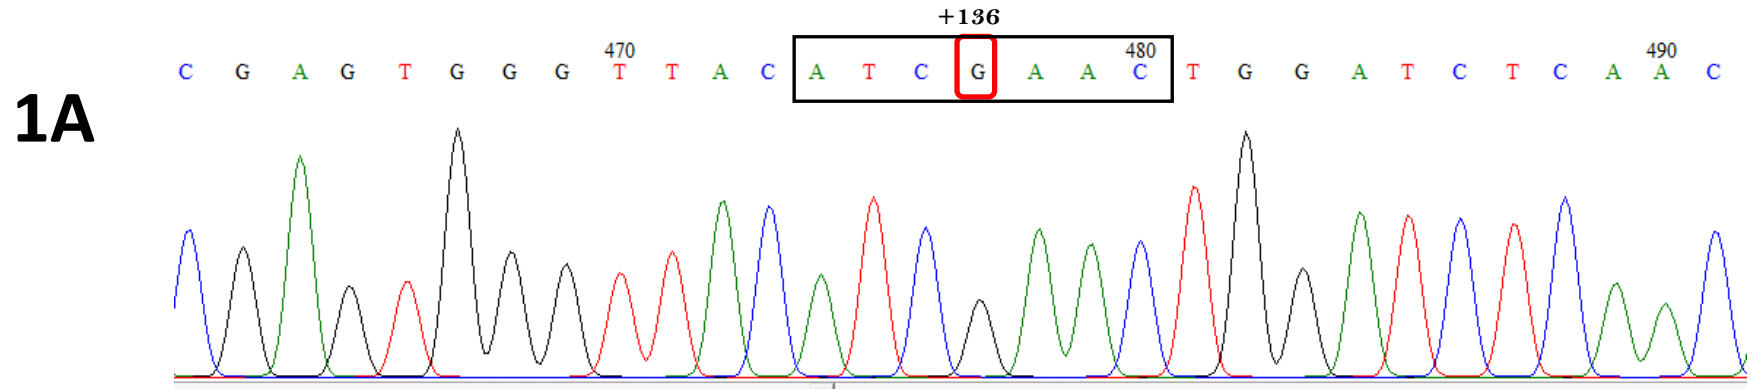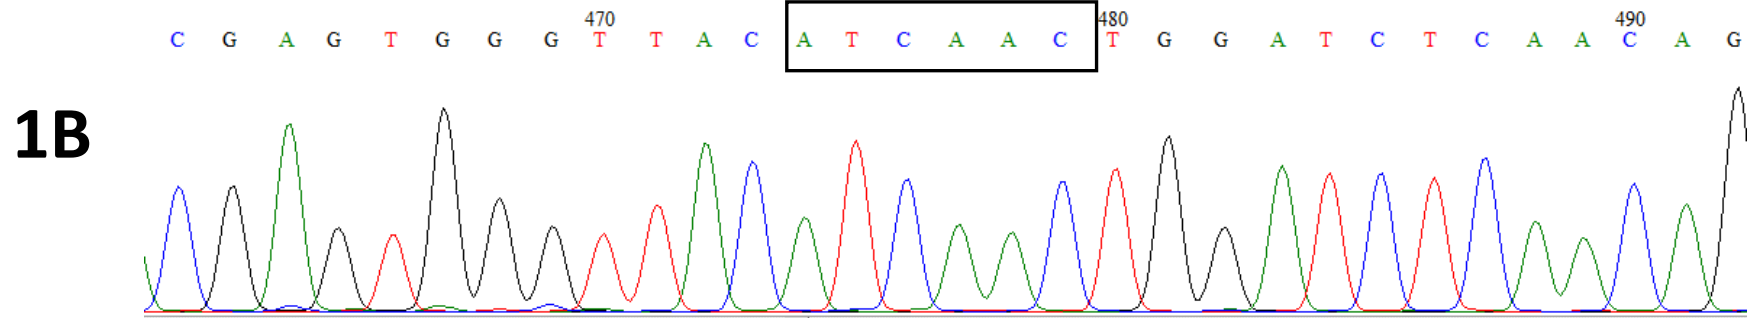

**1C**

|                                   |      |   |   |                         |   |   |      |
|-----------------------------------|------|---|---|-------------------------|---|---|------|
| <b>Wild-type (<i>bla</i> +):</b>  | ...A | T | C | <sup>136</sup> <b>G</b> | A | A | C... |
|                                   |      |   |   |                         |   |   |      |
| <b>Frameshift (<i>bla</i> -):</b> | ...A | T | C | -                       | A | A | C... |

**Fig 2A**

*bla+*

*bla-*

*blank*

**ACP**  
No  
dilution

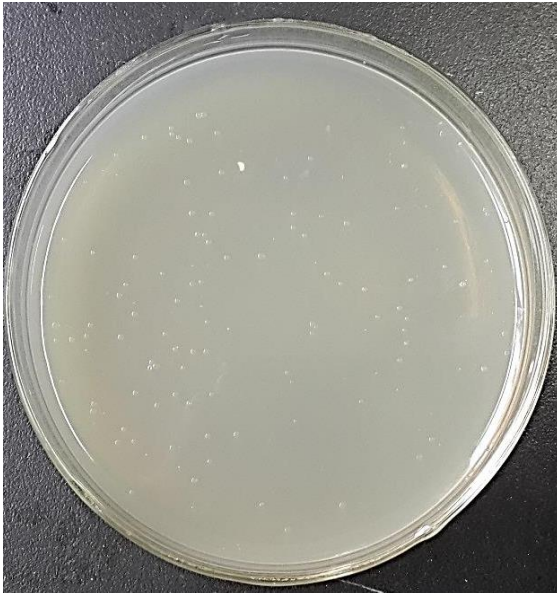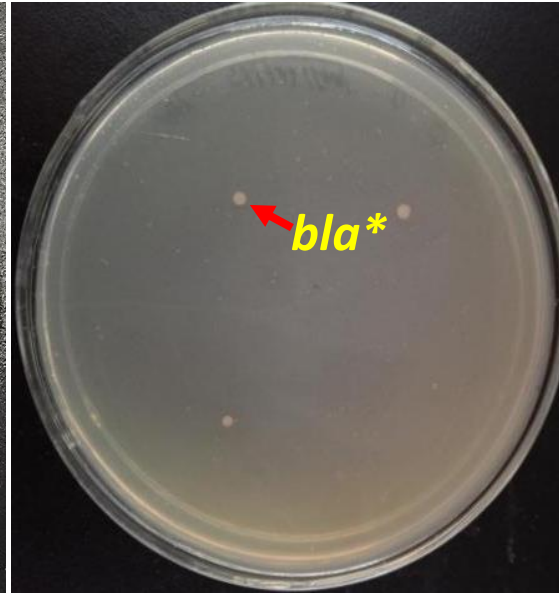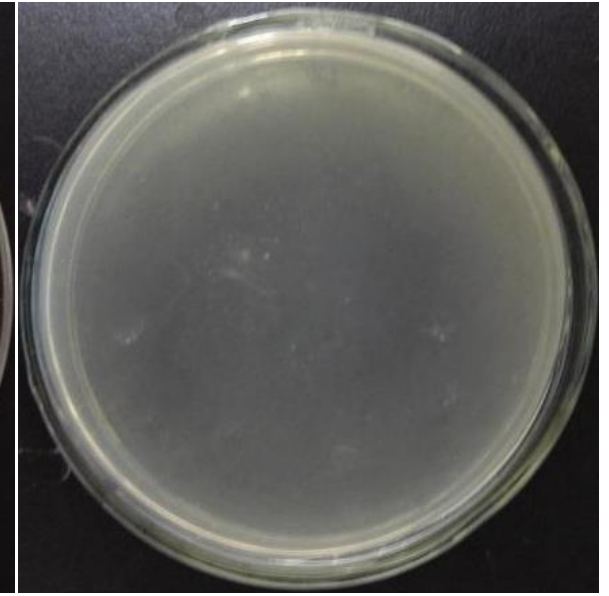

**TCP**  
 $10^{-7}$   
dilution

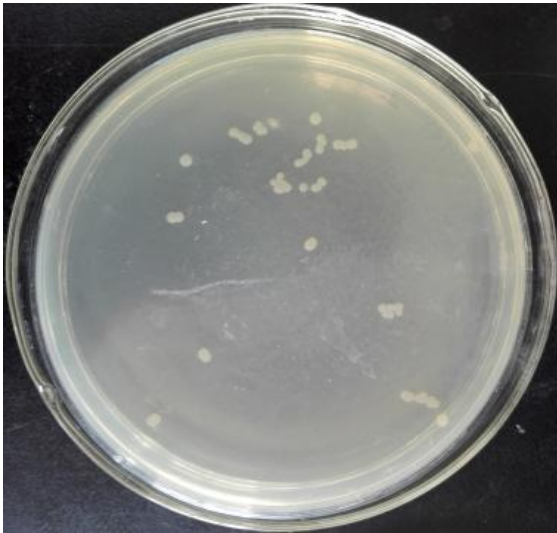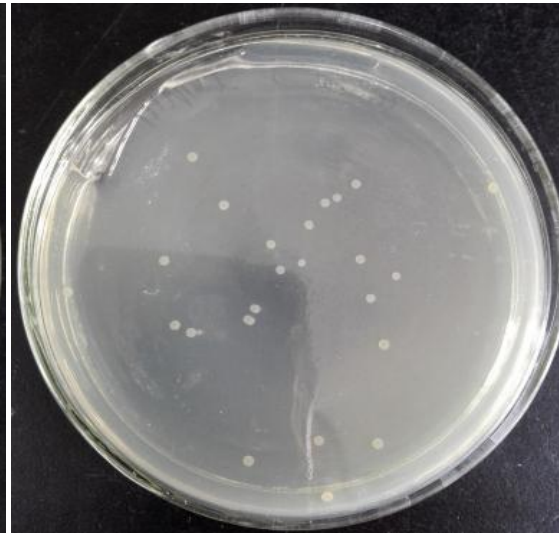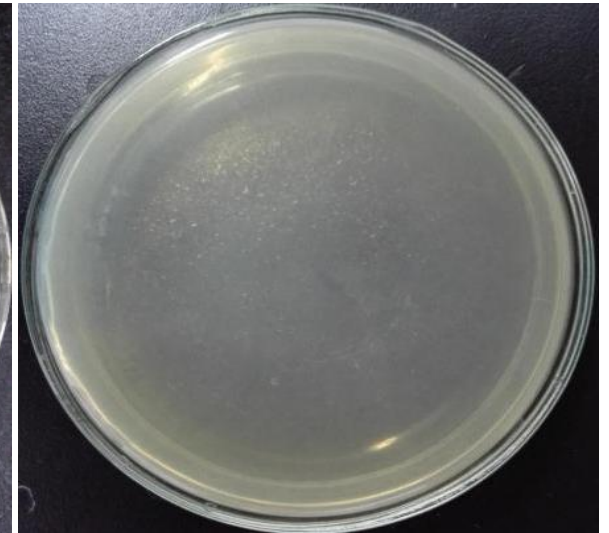





# Fig 2C

```

                20                40                60
bla+ : ATGAGTATTCAACATTTCCGTGTCGCCCTTATTCCCTTTTTTGCGGCATTTGCCTTCCTGTTTTTGCTCACCCAGA : 77
bla- : ATGAGTATTCAACATTTCCGTGTCGCCCTTATTCCCTTTTTTGCGGCATTTGCCTTCCTGTTTTTGCTCACCCAGA : 77
bla*A : ATGAGTATTCAACATTTCCGTGTCGCCCTTATTCCCTTTTTTGCGGCATTTGCCTTCCTGTTTTTGCTCACCCAGA : 77
bla*B : ATGAGTATTCAACATTTCCGTGTCGCCCTTATTCCCTTTTTTGCGGCATTTGCCTTCCTGTTTTTGCTCACCCAGA : 77
bla*C : ATGAGTATTCAACATTTCCGTGTCGCCCTTATTCCCTTTTTTGCGGCATTTGCCTTCCTGTTTTTGCTCACCCAGA : 77
bla*D : ATGAGTATTCAACATTTCCGTGTCGCCCTTATTCCCTTTTTTGCGGCATTTGCCTTCCTGTTTTTGCTCACCCAGA : 77
bla*E : ATGAGTATTCAACATTTCCGTGTCGCCCTTATTCCCTTTTTTGCGGCATTTGCCTTCCTGTTTTTGCTCACCCAGA : 77

                80                100                120                140
bla+ : AACGCTGGTGAAAGTAAAAGATGCTGAAGATCAGTTGGGTGCACGAGTGGG-TTACATCGAACTGGAT-CTCAACAG : 152
bla- : AACGCTGGTGAAAGTAAAAGATGCTGAAGATCAGTTGGGTGCACGAGTGGG-TTACATC-AACTGGAT-CTCAACAG : 151
bla*A : AACGCTGGTGAAAGTAAAAGATGCTGAAGATCAGTTGGGTGCACGAGTGGG-TTACATC-AACTGGAT-CTCAACA : 151
bla*B : AACGCTGGTGAAAGTAAAAGATGCTGAAGATCAGTTGGGTGCACGAGTGGGGTACCTTC--ACTGGATTTCAACAC : 152
bla*C : AACGCTGGTGAAAGTAAAAGATGCTGAAGATCAGTTGGGTGCACGAGTGGGGTTACTTC--ACTGGATTCTCACAC : 152
bla*D : AACGCTGGTGAAAGTAAAAGATGCTGAAGATCAGTTGGGTGCACGAGTGGG-TTACATC-AACTGGAT-CTCAACAG : 151
bla*E : AACGCTGGTGAAAGTAAAAGATGCTGAAGATCAGTTGGGTGCACGAGTGGG-TTACATC-AACTGGAT-CTCAACAG : 151

                160                180                200                220
bla+ : CGGTAAGATCCTTGAGAGTTTTCGCCCCGAAGAACGTTTTTCCAATGATGAGCACTTTTAAAGTTCTGCTATGTGGCG : 229
bla- : CGGTAAGATCCTTGAGAGTTTTCGCCCCGAAGAACGTTTTTCCAATGATGAGCACTTTTAAAGTTCTGCTATGTGGCG : 228
bla*A : CGGGAAAATCCTTGGAAGTTTTCCCCCCAAAAACGGTTTTCCAATGGTGAACACTTTTAAAGTTCTGGTATGGGGCG : 228
bla*B : CGTAAAATCCTGGAATTTTCCCCAAAAAC-TTTTCCAATGGAGAACACTTTTAAAGTTCCGCTAGGGGCC : 228
bla*C : CGGTAAAAATCCTTGAAAGTTTTCCCCAAAAACGTTTTCCAATGGATAACAACTTTTAAAGTTCGGCTATGGGCC : 228
bla*D : CGGTAAGATCCTTGAGAGTTTTCGCCCCGAAGAACGTTTTTCCAATGATGAGCACTTTTAAAGTTCTGCTATGTGGCG : 228
bla*E : CGGTAAGATCCTTGAGAGTTTTCGCCCCGAAGAACGTTTTTCCAATGATGAGCACTTTTAAAGTTCTGCTATGTGGCG : 228
```

# Fig 2D

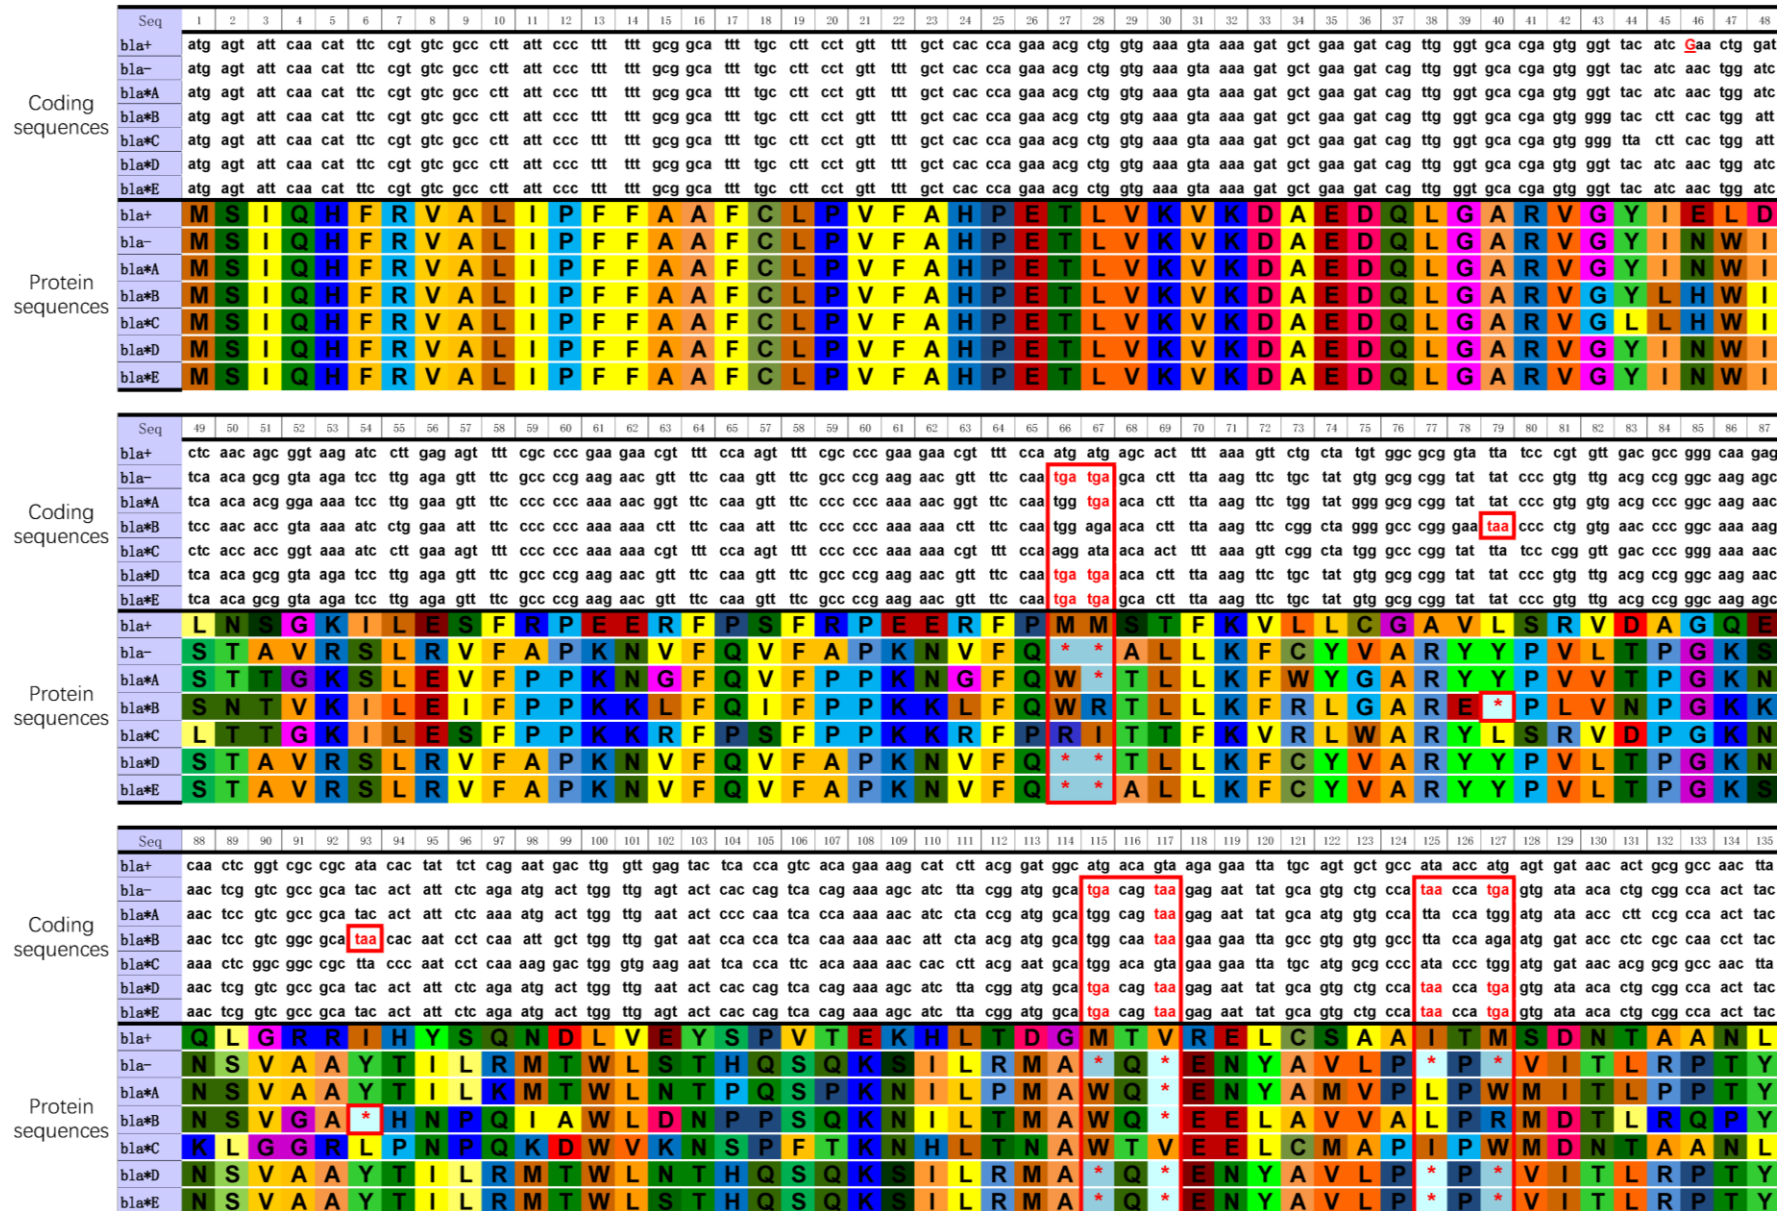

**Fig 3** *Random mutagenesis*

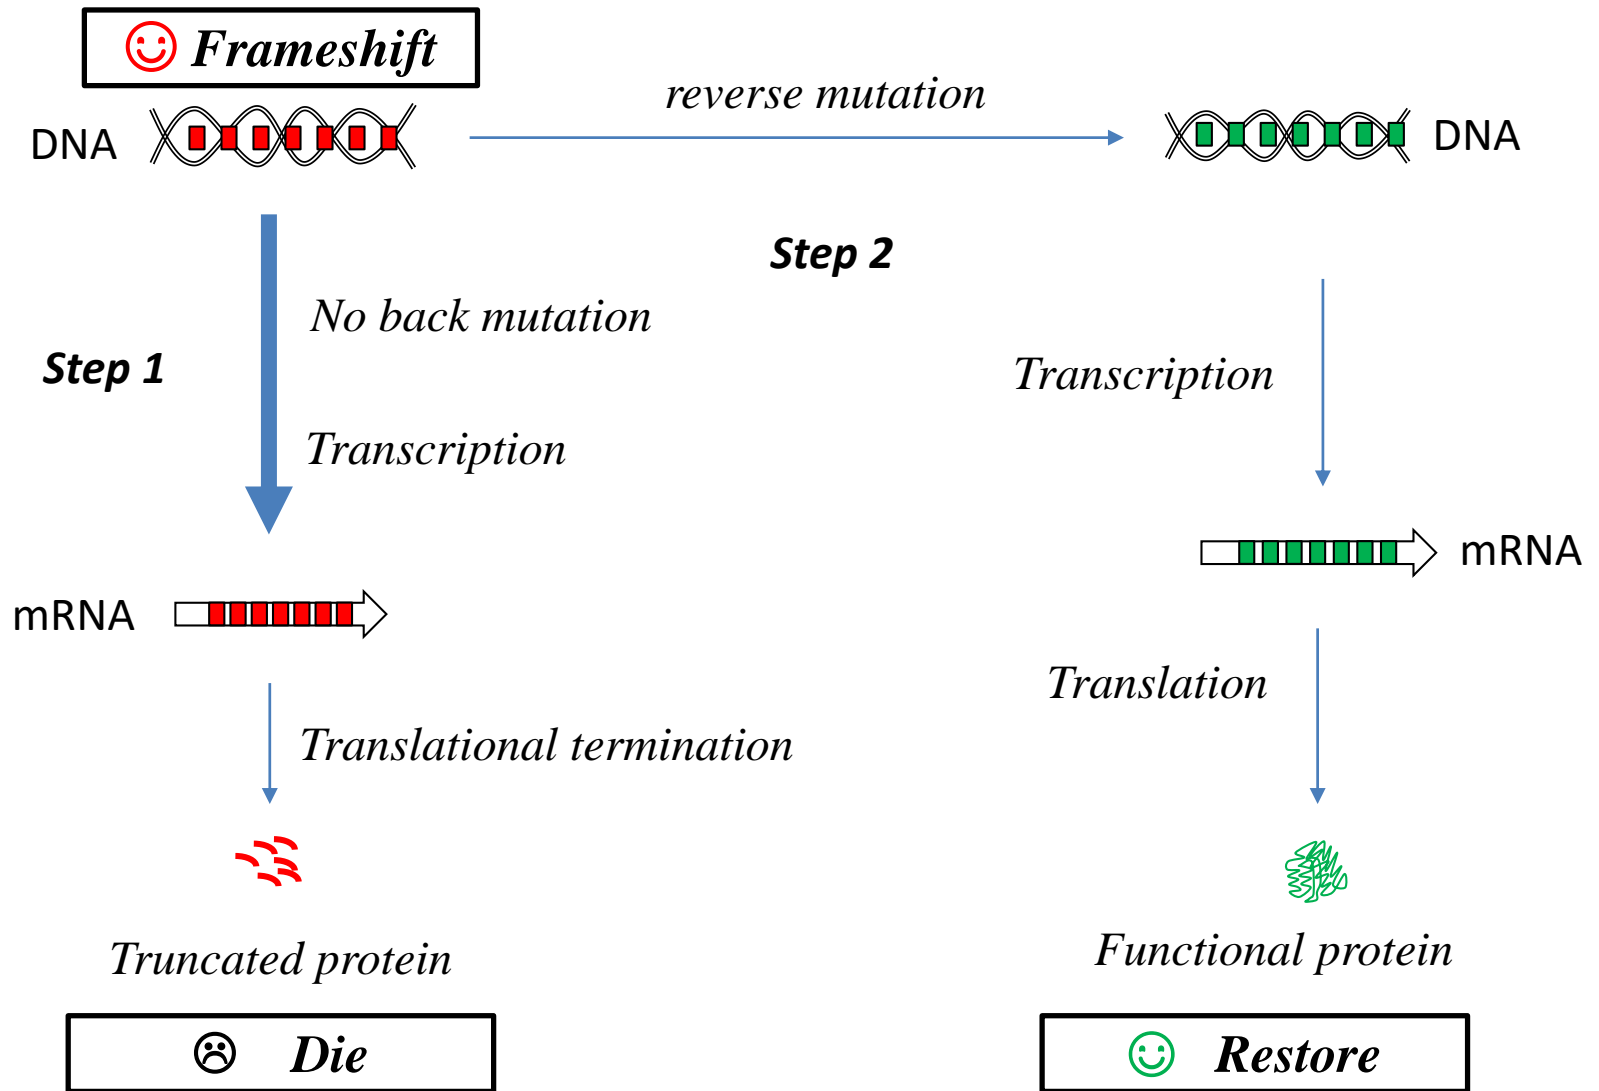

Fig 4A

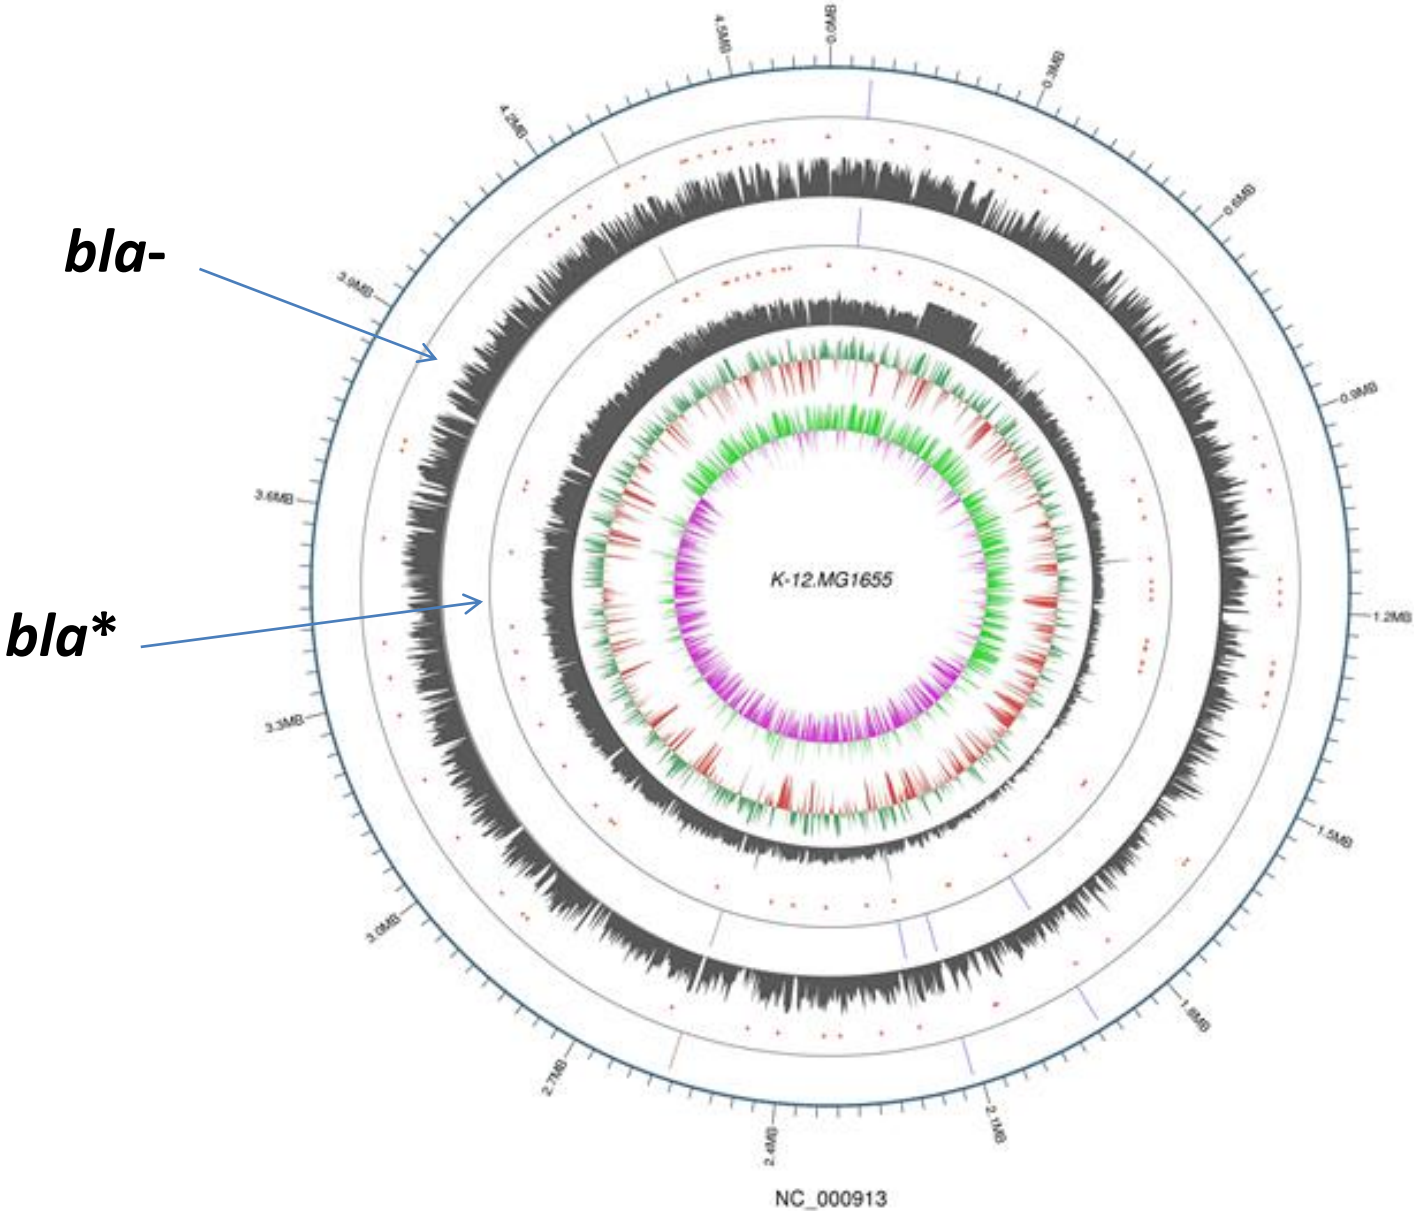

# Fig 4B

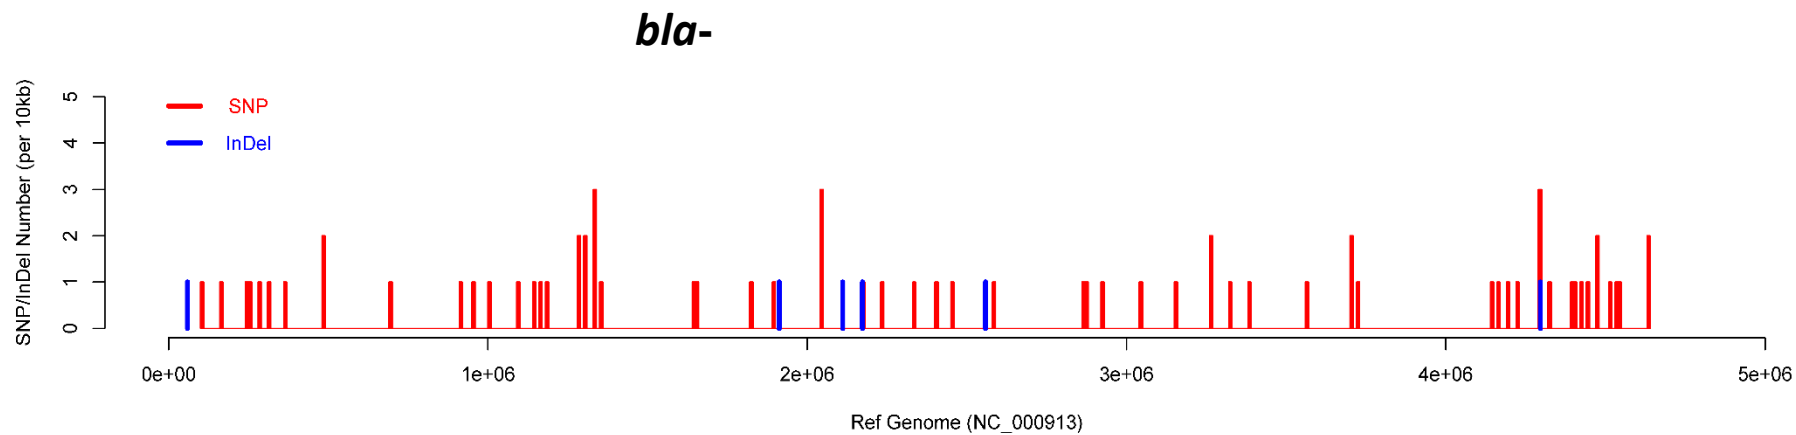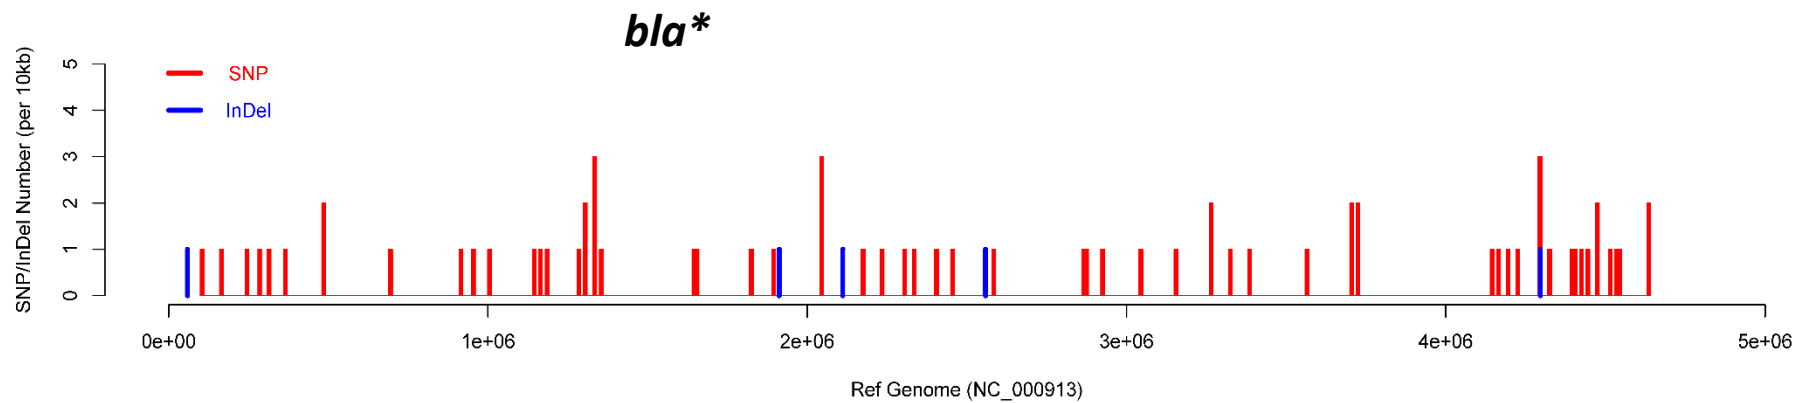

**Fig 4C**

**Structure Variation**

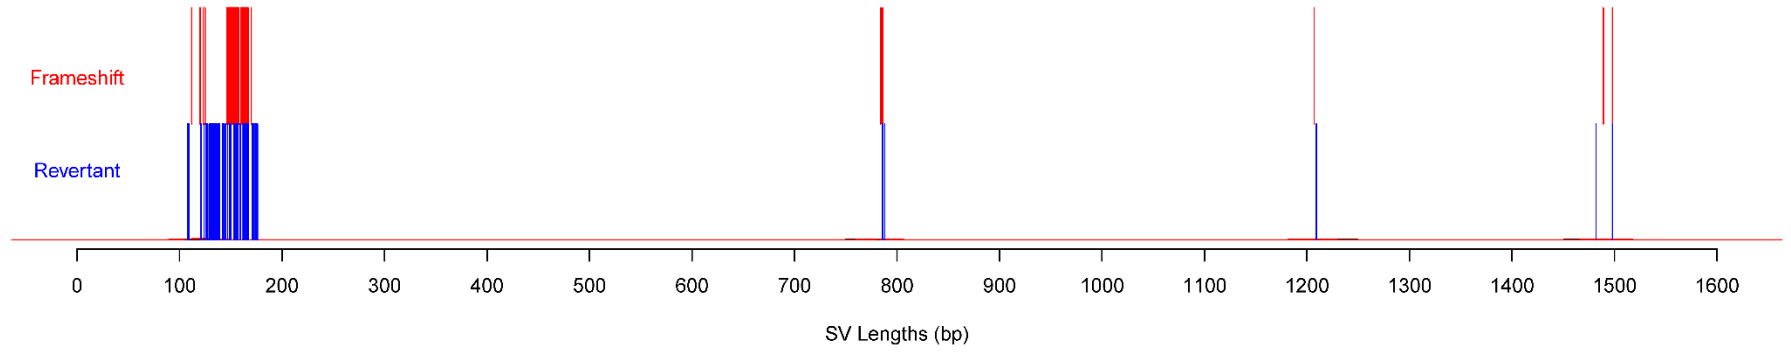

**Fig 5.** Expression of the PTC-free frameshifted bla (bla#)

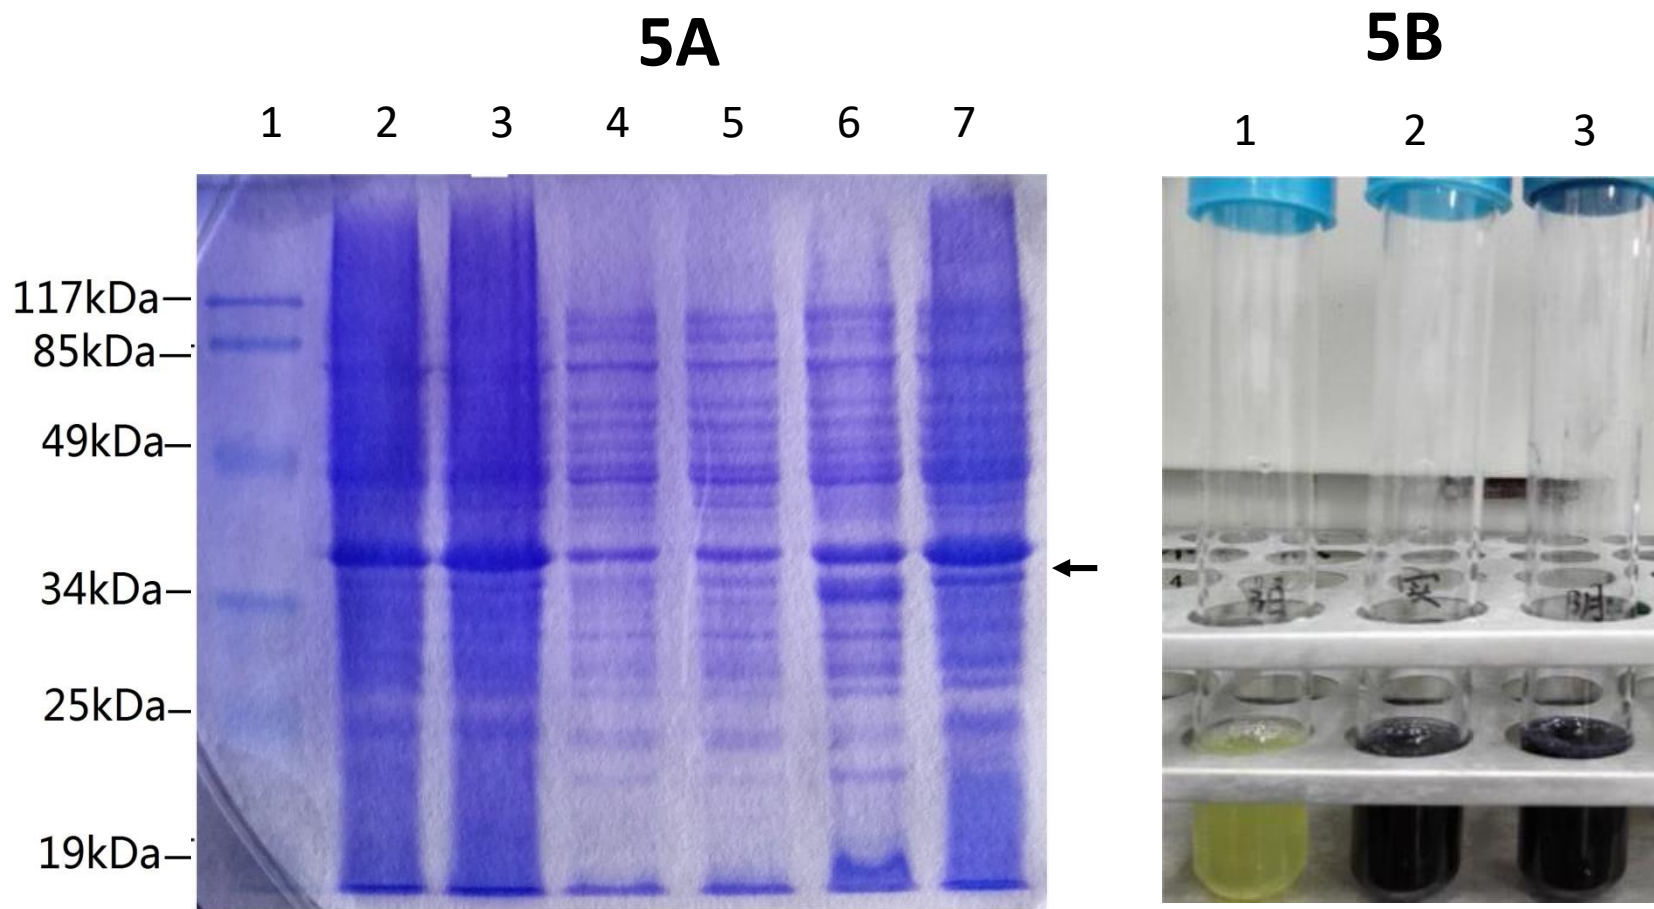

# Fig 6. Transcriptome Analysis

## 6A Numbers of differentially expressed genes (DGE)

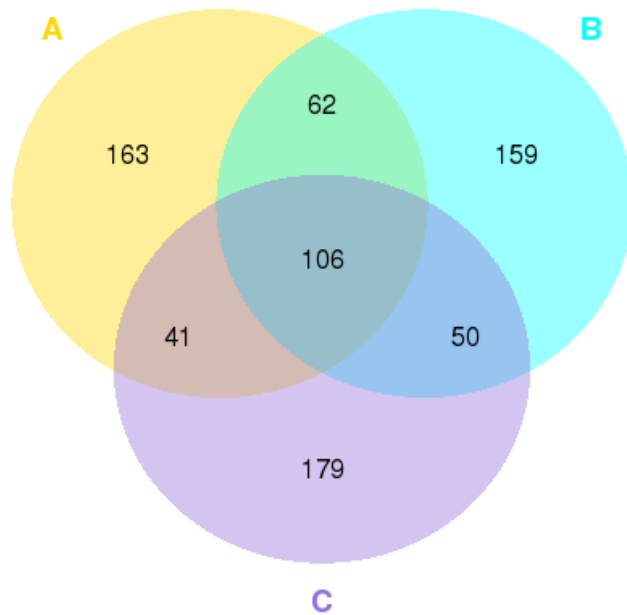

A: FS\_2vsW\_1  
B: R\_3vsW\_1  
C: RE\_4vsW\_1

Cluster analysis of differentially expressed genes

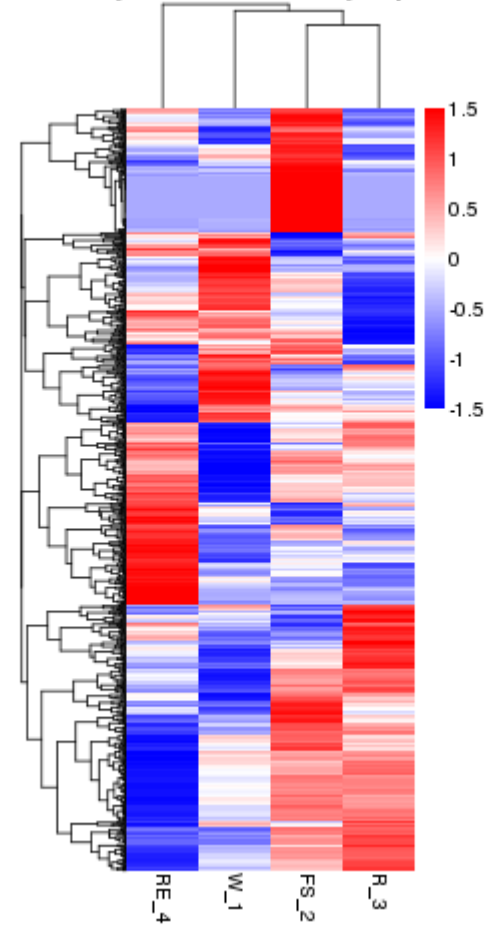



# 6B

The Most Enriched GO Terms (FS\_2vsW\_1)

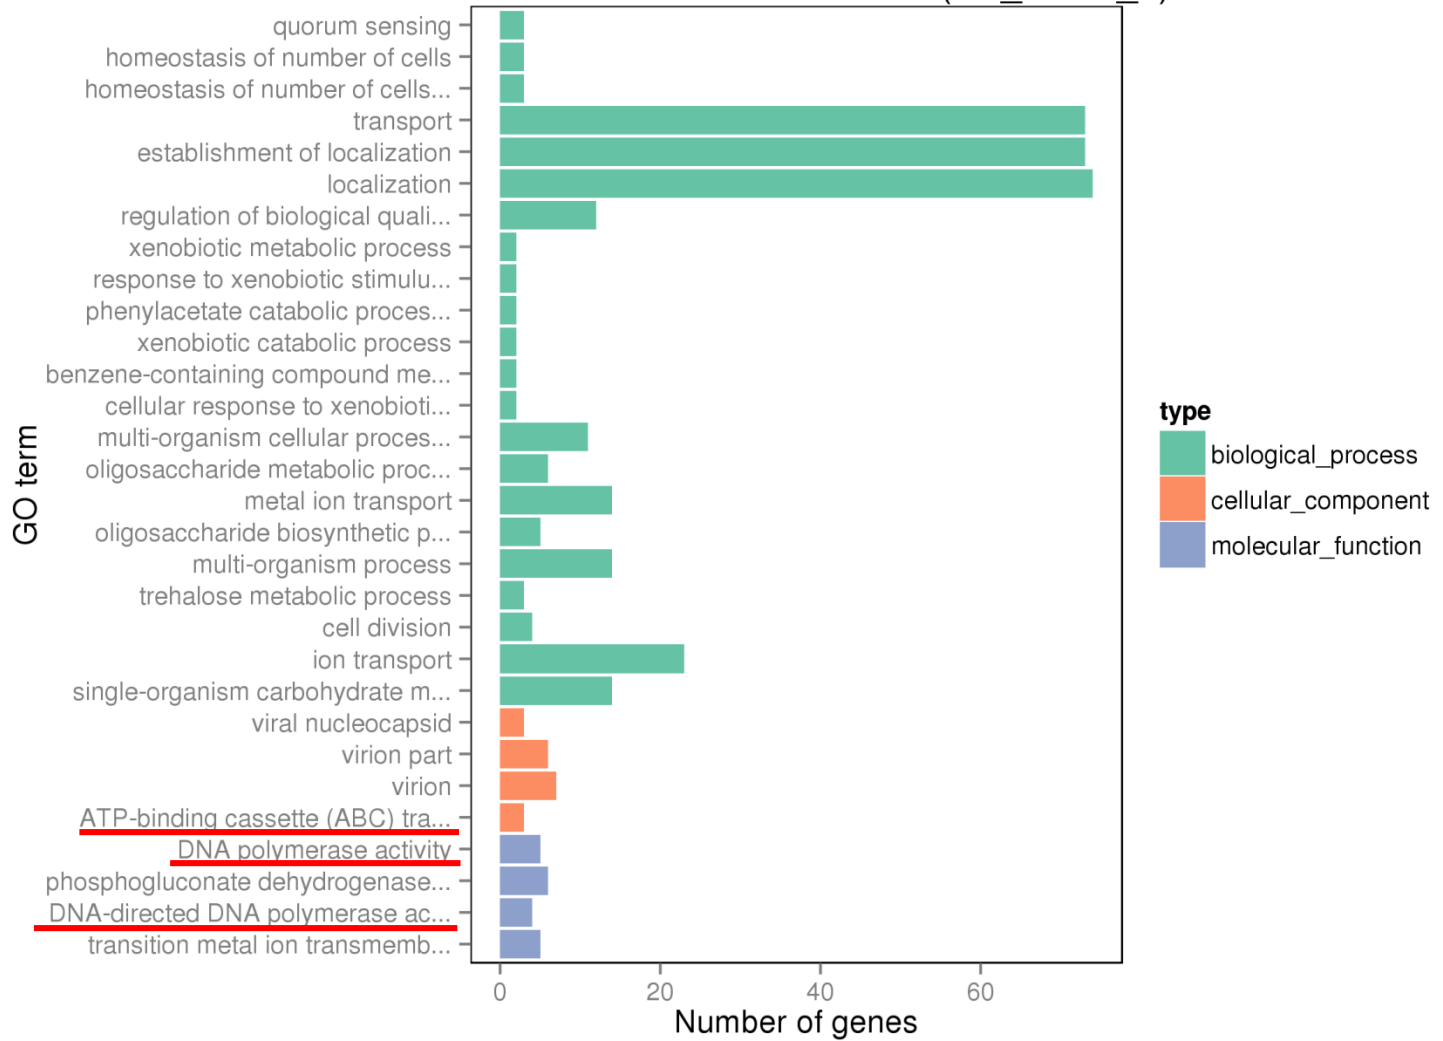

# 6C

The Most Enriched GO Terms (R\_3vsFS\_2)

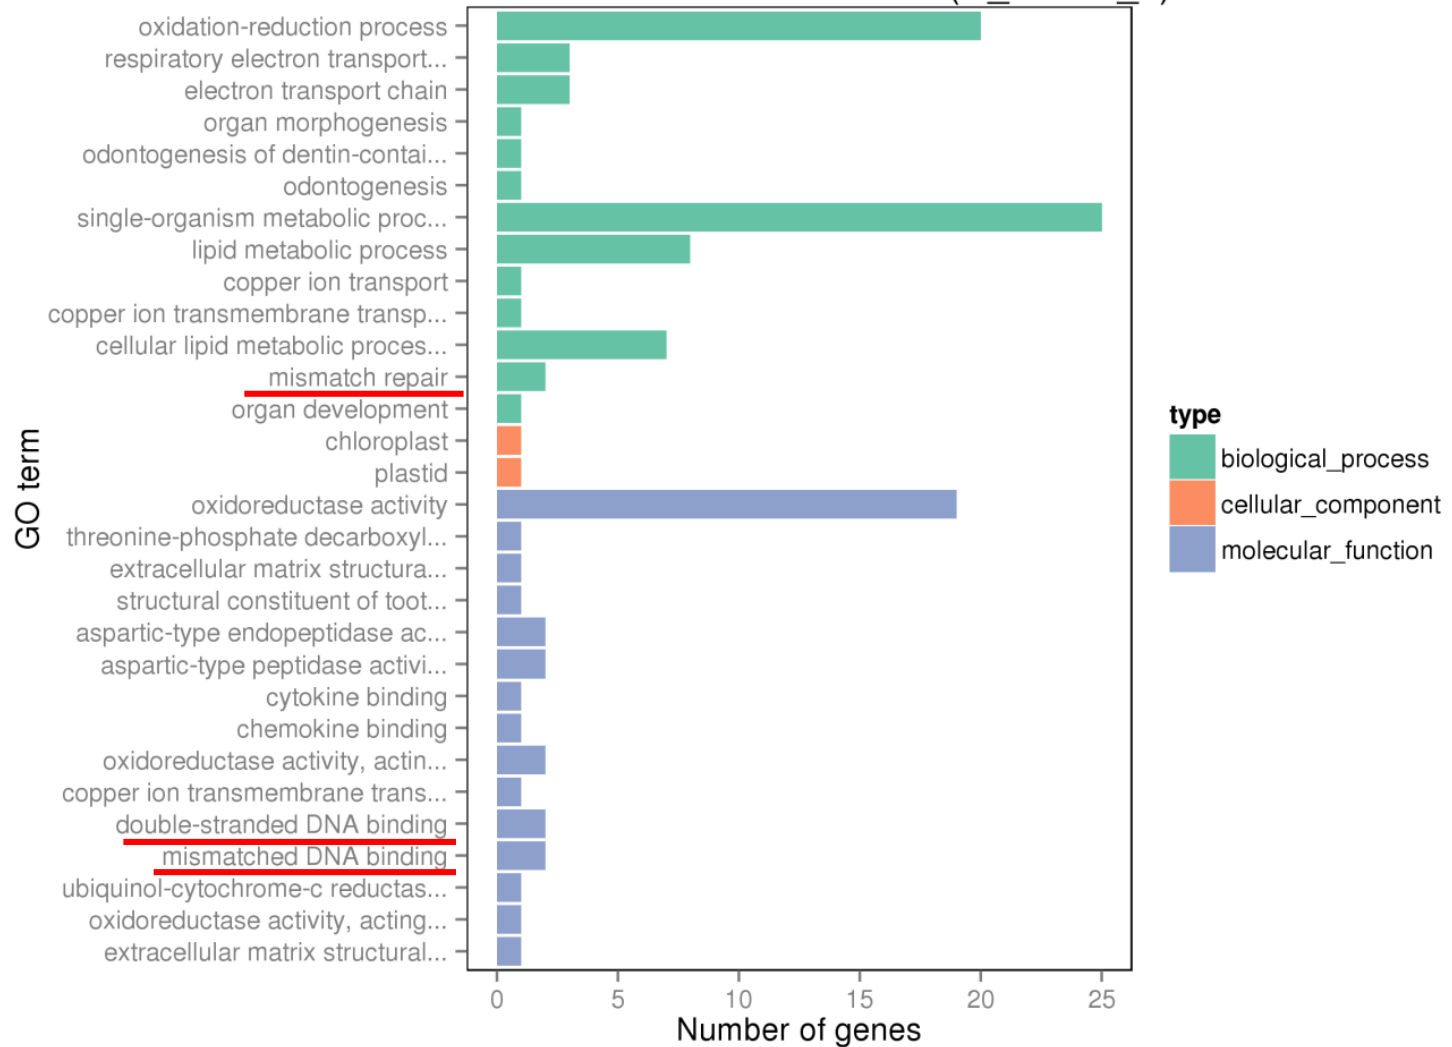

# 6D genes upregulated in DNA replication

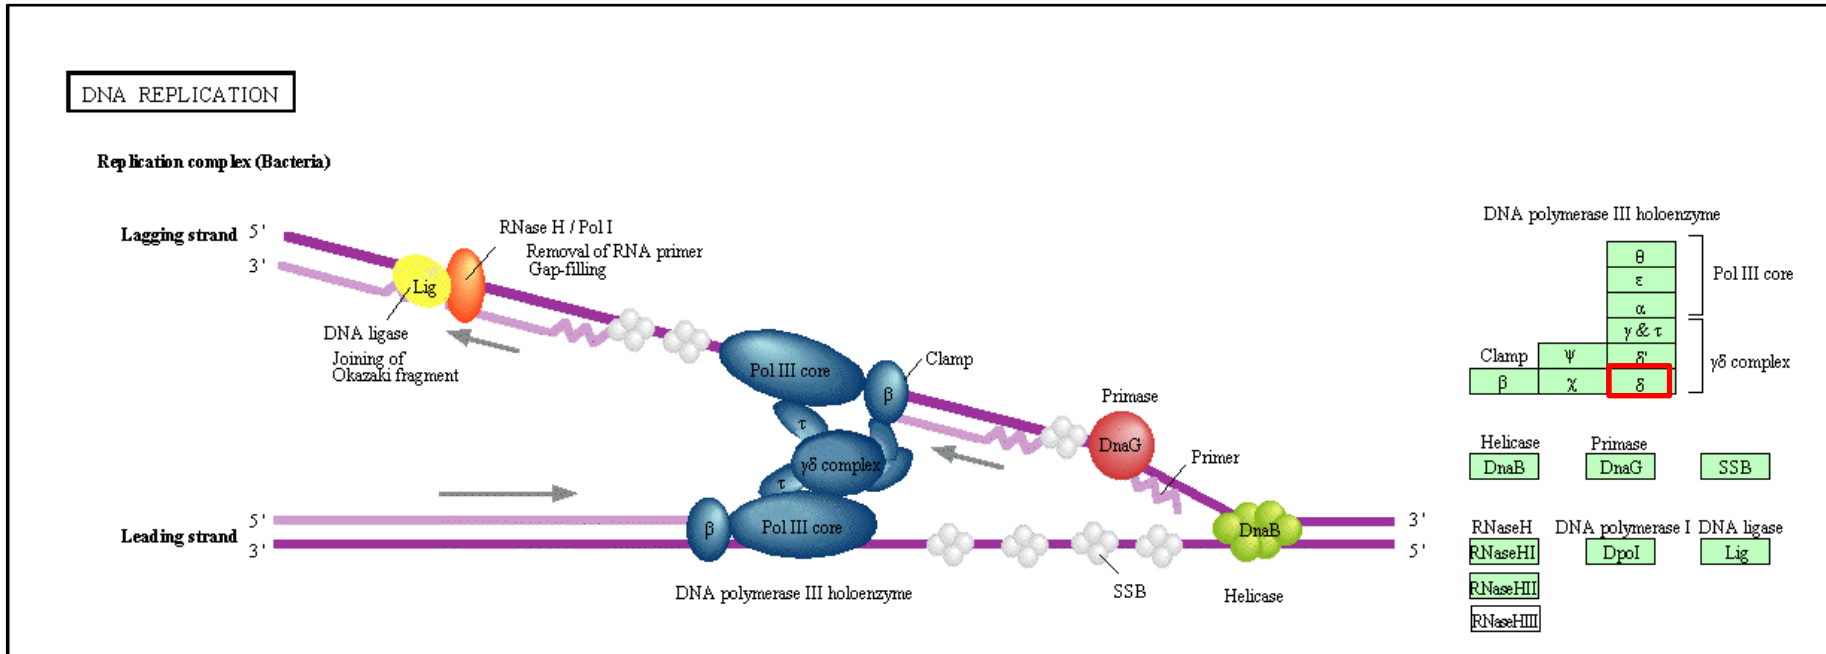

# 6E genes upregulated in RNA degradation/processing

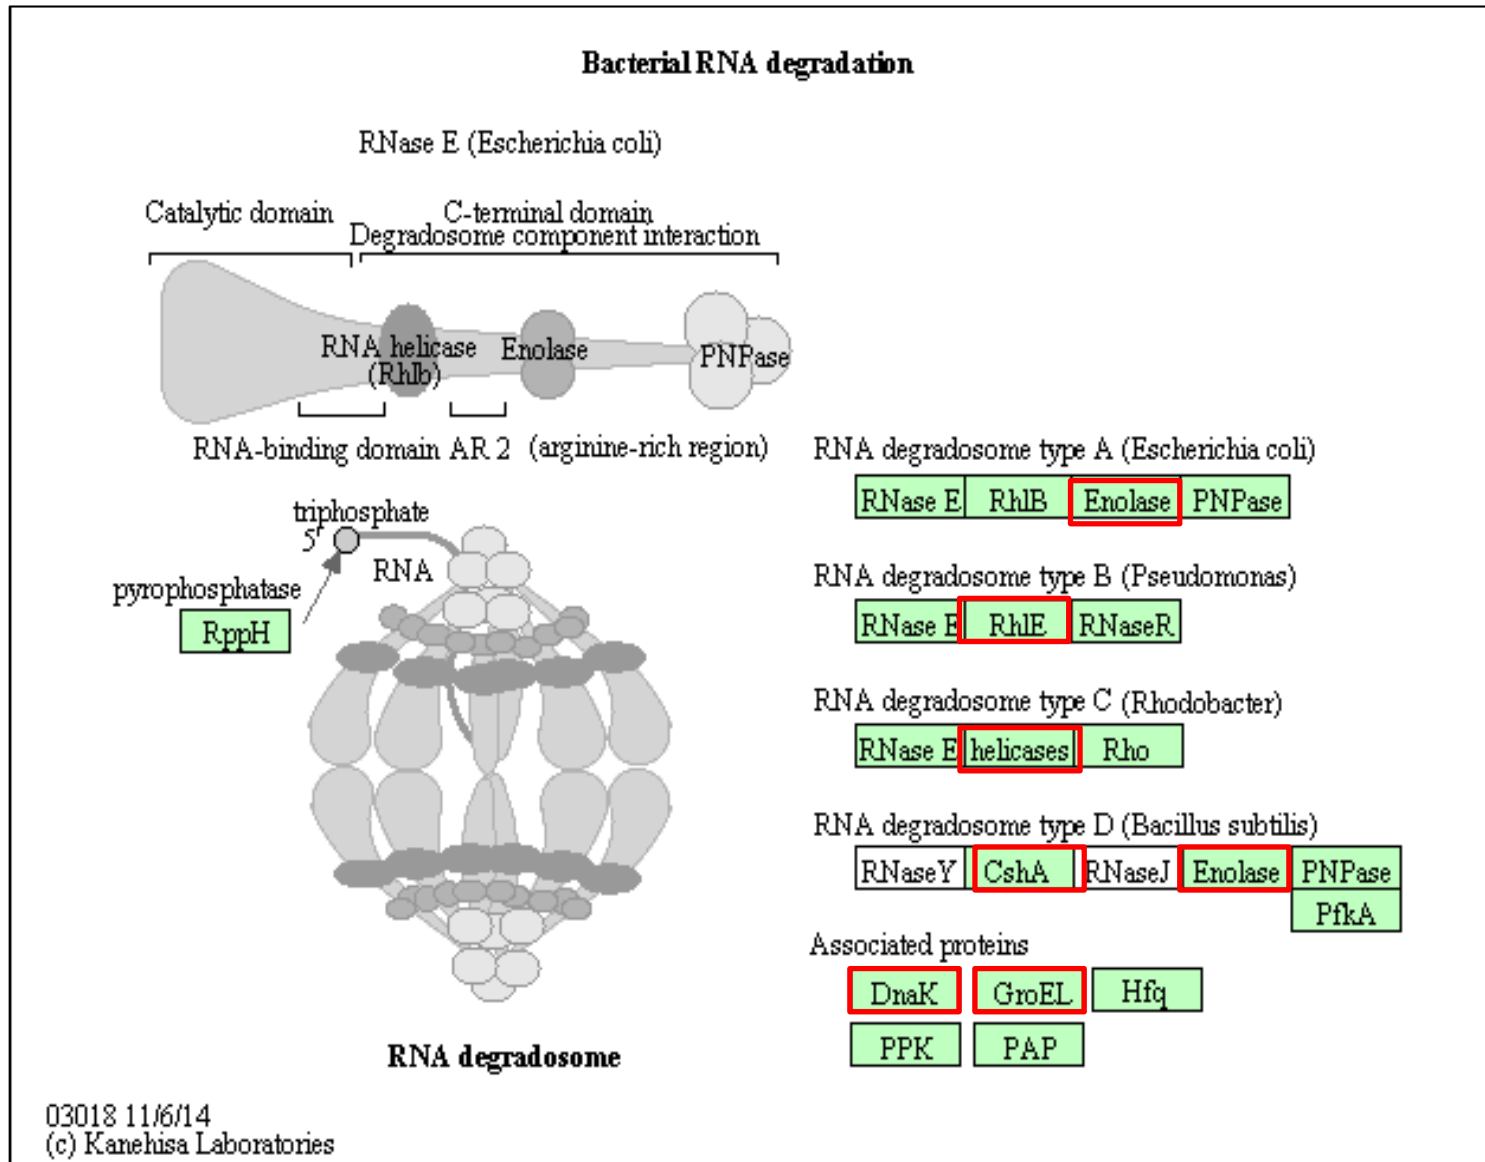

# 6F genes upregulated in mismatch repair/homologous recombination

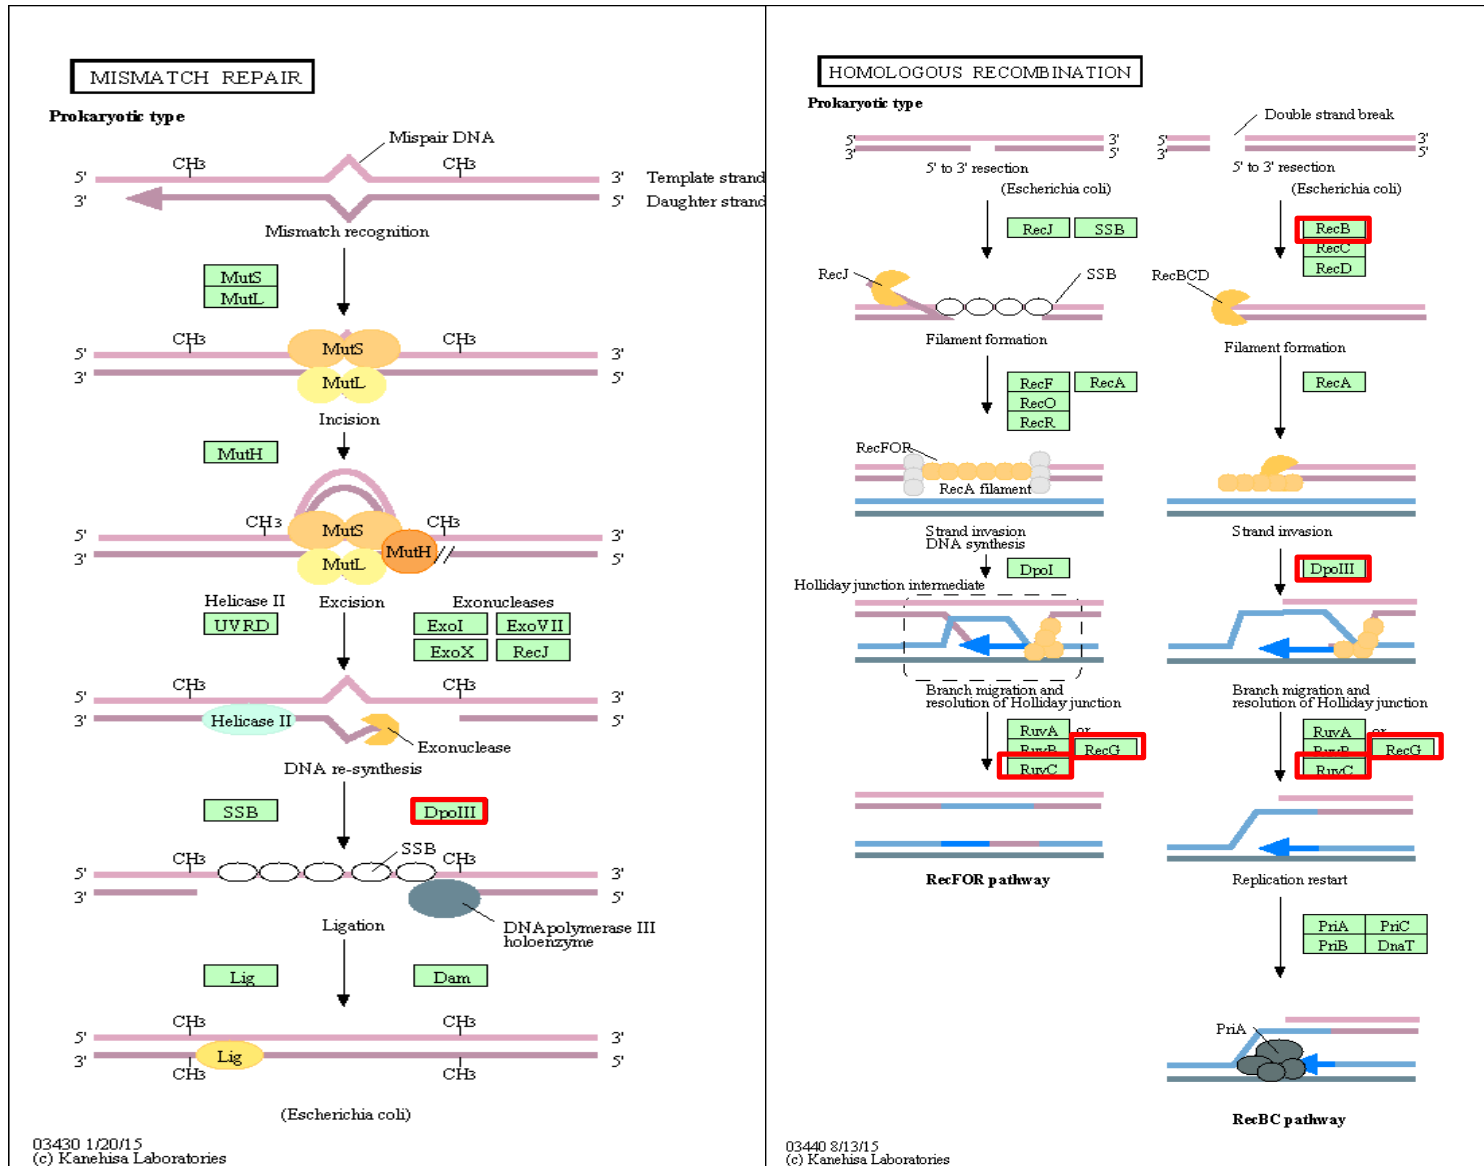

**Fig 7A.** Frameshift repair induced by DNA or RNA oligos (10 nM)

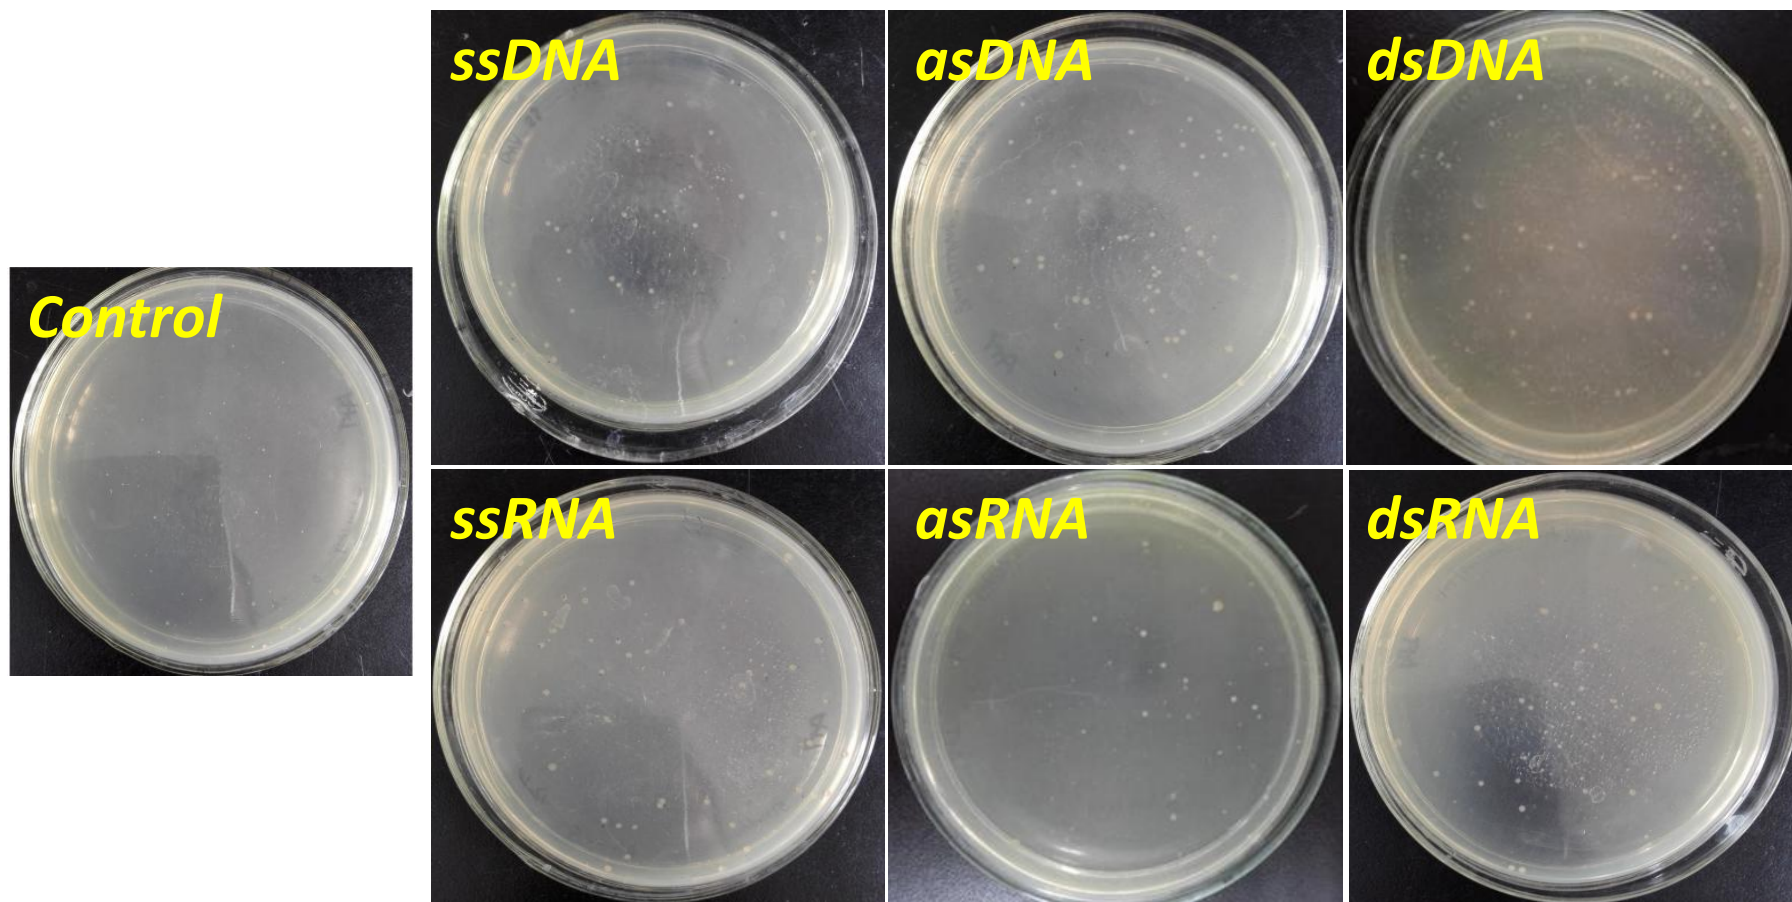

**Fig 7B.** The rate of reversions in different group

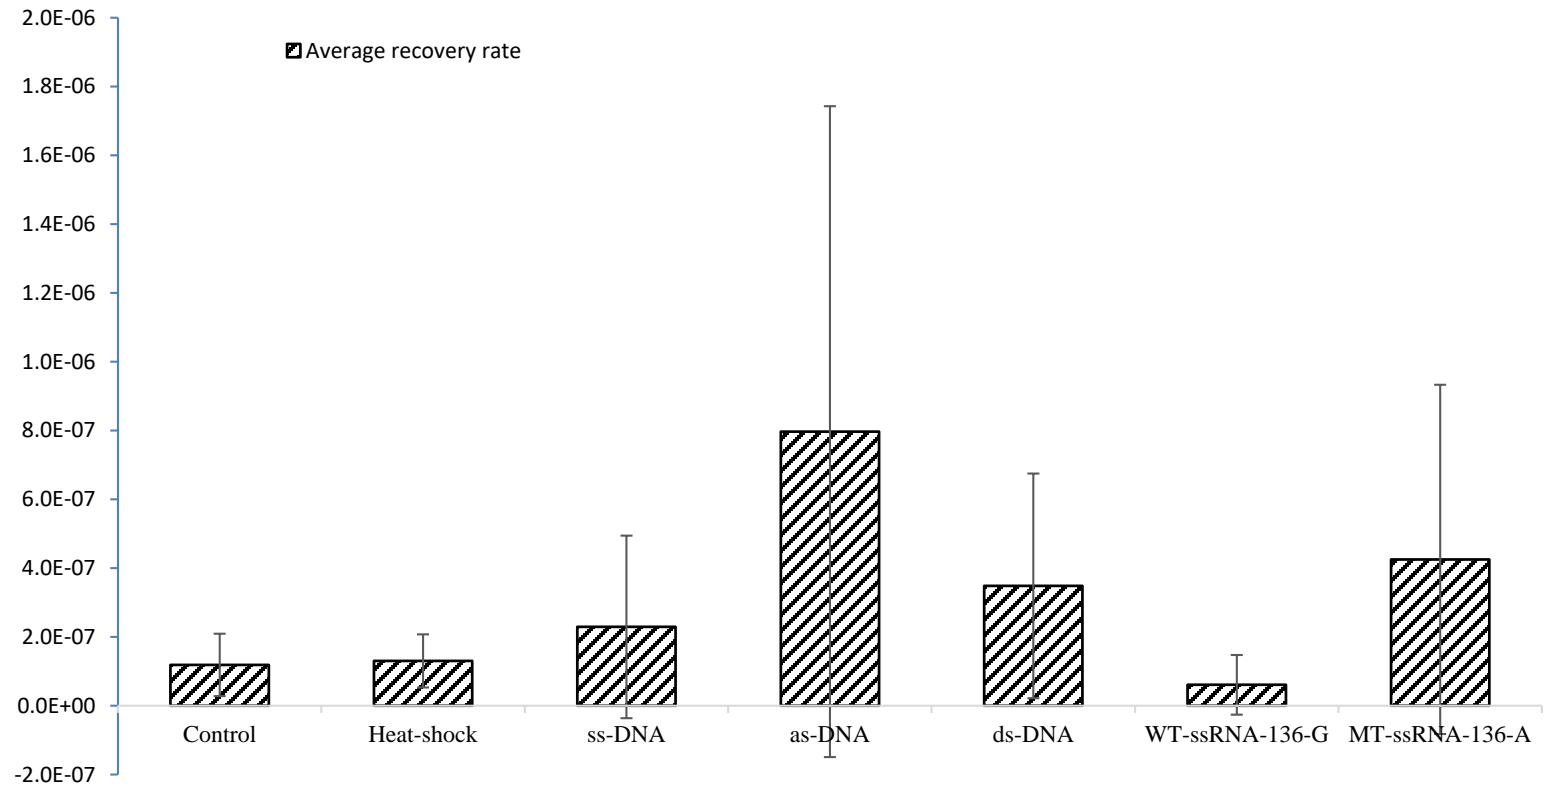





# Fig 7D. Sanger sequencing diagram of the RNA-induced revertants

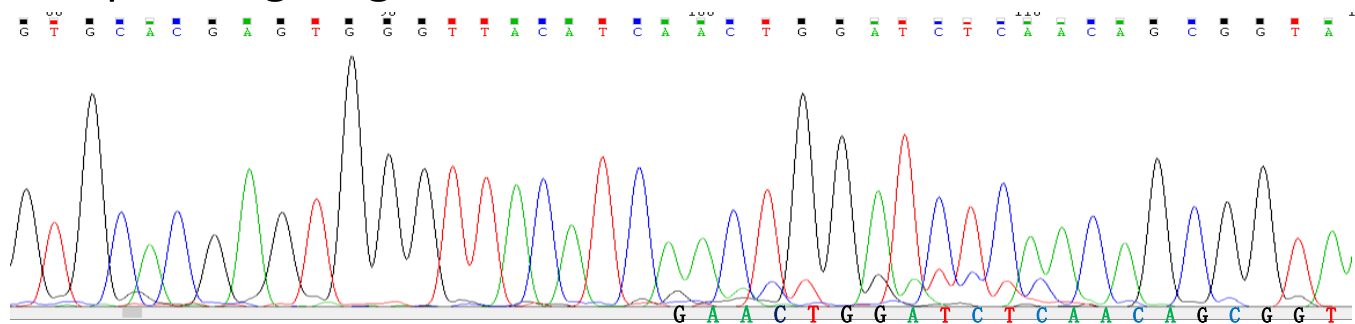

*Main Peaks:* T G C A C G A G T G G G T T A C A T C - A A C T G G A T C T C A A C A G C G G T

*2<sup>nd</sup> Peaks:* T G G A C G A G T G G G T T A C A T C G A A C T G G A T C T C A A C A G C G G T

*WT RNA oligo:* U G G A C G A G U G G G U U A C A U C G A A C U G G A U C U C A A C A G C G G U

*Wild-type:* T G C A C G A G T G G G T T A C A T C G A A C T G G A T C T C A A C A G C G G T

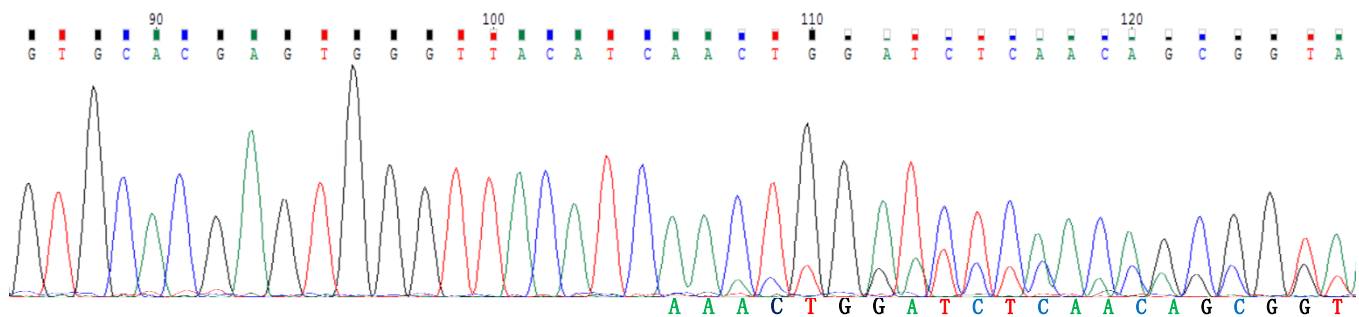

*Main Peaks:* T G C A C G A G T G G G T T A C A T C - A A C T G G A T C T C A A C A G C G G T

*2<sup>nd</sup> Peaks:* T G G A C G A G T G G G T T A C A T C A A A C T G G A T C T C A A C A G C G G T

*MT RNA oligo:* U G G A C G A G U G G G U U A C A U C A A A C U G G A U C U C A A C A G C G G U

*Wild-type:* T G C A C G A G T G G G T T A C A T C G A A C T G G A T C T C A A C A G C G G T

**Fig 8** *Nonsense-mediated gene editing (NMGE)*

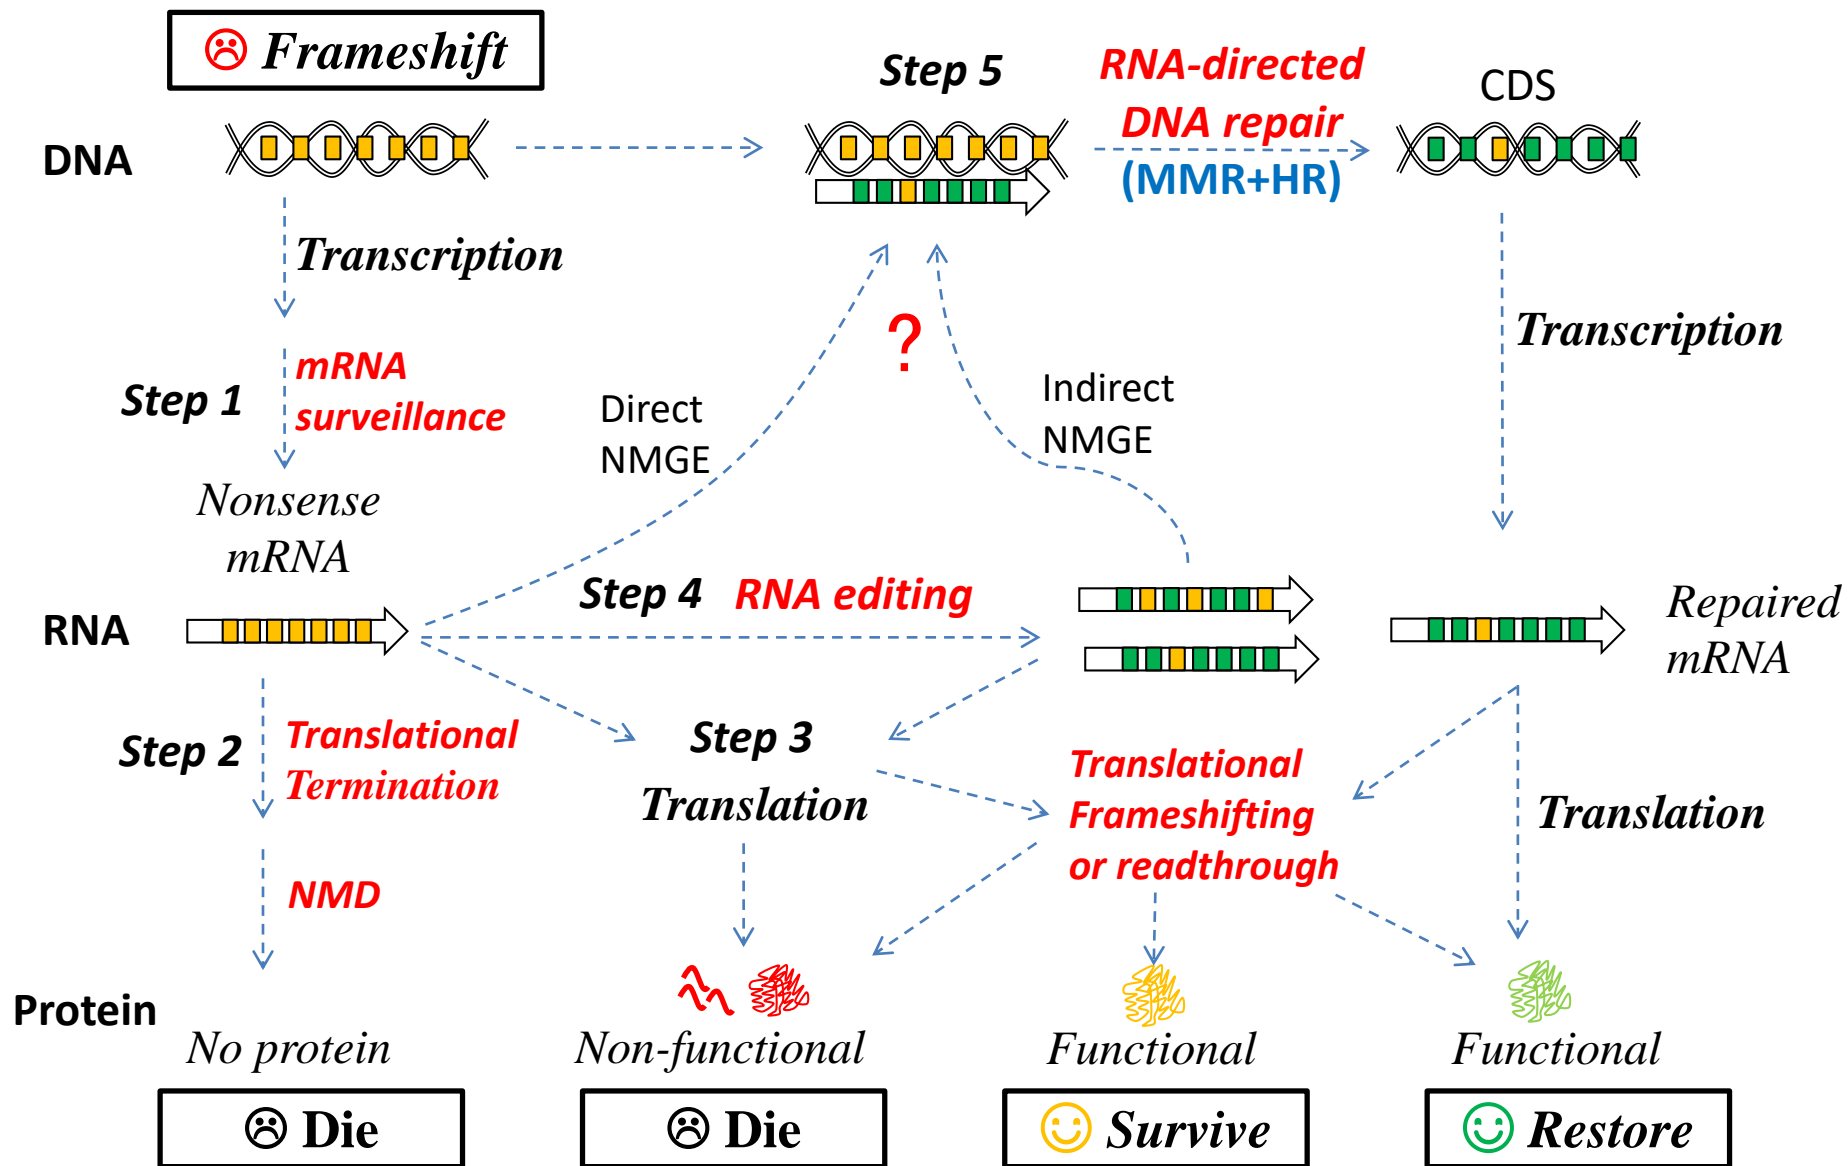

Source: https://www.biorxiv.org/content/10.1101/069971v4.full.pdf
